# Supplementary material for: The impact of the digital economy on green total factor productivity in Belt and Road countries: the mediating role of energy transition
Source: Frontiers journal article supplement (doi:10.3389/fenvs.2023.1213961), 2023-07-06
Supplement: Table_1.XLS [file Table_1.XLS]

## Sheet: Sheet1
id	year	GTFP	_CX	_CY	soc	de	de2	de22	ASEAN	WASIA	SASIA	MASIA	CIS	MEEU	fdi	urban	service	IC	rgdp	renewgener	renewableconsumption	country	industry2	indimobile	mobilecellular	fixedbroadband	fixedtele	indiinternet	iexports	iimports	egovi	eparti	eonlinei	humani	infras	CountryName	EGovernmentRank	EGovernmentIndex	EParticipationIndex	OnlineServiceIndex	HumanCapitalIndex	TelecommunicationInfrastructure	ictimports	ictexports	individualinternet	individualmobile	fixedtelephone	fixbroadband	labor2
4	2006	1.27261	47.5285	40.2883	AZE	-0.898202	0.806766	0.00807981	0	0	0	0	1	0	1289475000	52.589	23.3141	0.572781	2473.08	2.493	0.0277545	Azerbaijan	12.3535		3320000	0.0451311	1180000	11.9922	0.03667	4.32972	0.405187	0.0939133	0.252053	0.880737	0.08338								4.32972	0.03667	11.9922		1180000	0.0451311	4110.8
4	2007	1.3044	47.5285	40.2883	AZE	-0.816689	0.666981	0.0128958	0	0	0	0	1	0	5034521000	52.79	21.6322	0.575179	3851.44	2.34	0.0223165	Azerbaijan	12.6255		4520000	0.164444	1250000	14.54	0.02694	3.86787	0.433043	0.171957	0.323347	0.881473	0.09554								3.86787	0.02694	14.54		1250000	0.164444	4162.2
4	2008	0.991982	47.5285	40.2883	AZE	-0.730028	0.53294	0.0192451	0	0	0	0	1	0	540824000	52.99	23.4421	0.549131	5574.6	2.21	0.0197438	Azerbaijan	12.1302	69.5085	6550000	0.666689	1310000	17.08	0.00386	3.52746	0.4609	0.25	0.39464	0.88221	0.1077	Azerbaijan	89	0.4609	0.25	0.39464	0.88221	0.1077	3.52746	0.00386	17.08	69.5085	1310000	0.666689	4198.45
4	2009	1.07664	47.5285	40.2883	AZE	-0.670523	0.449601	0.0243383	0	0	0	0	1	0	-147181000	53.19	31.2245	0.573489	4950.29	2.287	0.0213999	Azerbaijan	12.6691	76.397	7760000	1.09654	1400000	27.4	0.01319	5.44188	0.45898	0.21071	0.35922	0.900355	0.12031								5.44188	0.01319	27.4		1400000	1.09654	4244.23
4	2010	0.920606	47.5285	40.2883	AZE	-0.680176	0.46264	0.0234714	0	0	0	0	1	0	-331155000	53.406	27.9336	0.610245	5843.53	3.413	0.0320621	Azerbaijan	13.7168	83.2855	9100000	5.14544	1510000	46	0.00657	3.46529	0.45706	0.17142	0.3238	0.9185	0.13292	Azerbaijan	83	0.45706	0.17142	0.3238	0.9185	0.13292	3.46529	0.00657	46	83.2855	1510000	5.14544	4308.12
4	2011	0.876738	47.5285	40.2883	AZE	-0.606705	0.36809	0.0304644	0	0	0	0	1	0	-932582000	53.637	27.3238	0.607395	7189.69	2.649	0.0234278	Azerbaijan	14.0745	83.959	10100000	10.4057	1680000	50	0.00381	3.45804	0.47772	0.15151	0.344905	0.87218	0.218095								3.45804	0.00381	50		1680000	10.4057	4352.18
4	2012	0.848991	47.5285	40.2883	AZE	-0.542935	0.294778	0.0372721	0	0	0	0	1	0	-812407000	53.883	29.2083	0.596035	7496.29	1.803	0.0153183	Azerbaijan	14.287	84.6325	10100000	14.4387	1720000	54.2	0.00303	3.3144	0.49838	0.1316	0.36601	0.82586	0.30327	Azerbaijan	96	0.49838	0.1316	0.36601	0.82586	0.30327	3.3144	0.00303	54.2		1720000	14.4387	4402.82
4	2013	0.996752	47.5285	40.2883	AZE	-0.405331	0.164293	0.0542987	0	0	0	0	1	0	-1141550000	54.145	30.914	0.599111	7875.76	1.61	0.0141054	Azerbaijan	14.375	85.306	10100000	17.8083	1760000	73	0.03836	2.4132	0.52279	0.281485	0.39954	0.78693	0.38188								2.4132	0.03836	73		1760000	17.8083	4491.27
4	2014	0.926033	47.5285	40.2883	AZE	-0.281055	0.078992	0.0724209	0	0	0	0	1	0	-2443393000	54.422	33.6159	0.591285	7891.31	1.466	0.0126963	Azerbaijan	14.3042	85.9795	10600000	19.4836	1800000	75	0.00782	2.96531	0.5472	0.43137	0.43307	0.748	0.46049	Azerbaijan	68	0.5472	0.43137	0.43307	0.748	0.46049	2.96531	0.00782	75		1800000	19.4836	4567.95
4	2015	0.937451	47.5285	40.2883	AZE	-0.145692	0.0212262	0.0951239	0	0	0	0	1	0	-838252000	54.714	39.996	0.577912	5500.31	1.813	0.0163597	Azerbaijan	14.0637	86.653	10700000	19.2575	1800000	77	0.01924	2.8407	0.587305	0.55467	0.557115	0.731915	0.47287								2.8407	0.01924	77		1800000	19.2575	4643.38
4	2016	0.921701	47.5285	40.2883	AZE	-0.0167729	0.000281329	0.11962	0	0	0	0	1	0	-1926065000	55.021	38.6925	0.586844	3880.74	2.172	0.0167013	Azerbaijan	14.328	87.3265	10200000	18.0796	1700000	78.2	0.0227	2.74446	0.62741	0.67797	0.68116	0.71583	0.48525	Azerbaijan	56	0.62741	0.67797	0.68116	0.71583	0.48525	2.74446	0.0227	78.2		1700000	18.0796	4722.35
4	2017	0.961685	47.5285	40.2883	AZE	0.0433224	0.00187683	0.131996	0	0	0	0	1	0	-3.03106e+08	55.343	37.5761	0.586852	4147.09	1.958	0.01403	Azerbaijan	14.4721	88	10100000	17.9239	1690000	79	0.01904	3.74631	0.642405	0.678885	0.70518	0.726365	0.495725								3.74631	0.01904	79	88	1690000	17.9239	4822.1
4	2018	0.979862	47.5285	40.2883	AZE	0.103066	0.0106225	0.144904	0	0	0	0	1	0	357879000	55.68	34.798	0.590755	4739.84	2.034	0.0140348	Azerbaijan	14.674	86.9	10300000	18.6251	1680000	79.8	0.02232	4.57399	0.6574	0.6798	0.7292	0.7369	0.5062	Azerbaijan	70	0.6574	0.6798	0.7292	0.7369	0.5062	4.57399	0.02232	79.8	86.9	1680000	18.6251	4879.25
4	2019	0.963239	47.5285	40.2883	AZE	0.133054	0.0177033	0.15161	0	0	0	0	1	0	927801000	56.031	36.4911	0.598725	4805.75	1.89435	0.0122493	Azerbaijan	14.906	86.9	10800000	18.9882	1670000	81.1	0.0206	3.94601	0.6837	0.68515	0.71755	0.7541	0.5795								3.94601	0.0206	81.1	86.9	1670000	18.9882	4938.54
4	2020	0.930994	47.5285	40.2883	AZE	0.242751	0.0589281	0.177433	0	0	0	0	1	0	318126200	56.397	42.3542	0.61951	4229.91	1.411	0.00891894	Azerbaijan	14.9515	89.1	10300000	19.4019	1650000	84.6	0.14377	5.86171	0.71	0.6905	0.7059	0.7713	0.6528	Azerbaijan	70	0.71	0.6905	0.7059	0.7713	0.6528	5.86171	0.14377	84.6	89.1	1650000	19.4019	4876.62
4	2021	1.00815	47.5285	40.2883	AZE	0.279409	0.0780695	0.186515	0	0	0	0	1	0	1784653000	56.776	37.6273	0.621883	5388	1.6173	0.00899892	Azerbaijan	15.445	89.9	10800000	19.9326	1640000	86	0.02349	5.51419	0.7363	0.69585	0.69425	0.7885	0.7261								5.51419	0.02349	86	89.9	1640000	19.9326	4988.22
5	2006	2.89564	25.2387	42.7653	BGR	-0.424952	0.180584	0.0516756	0	0	0	0	0	1	-7582756076	70.932	52.9401	1.59835	4523.05	4.223	0.020317	Bulgaria	34.4726	60.7951	8250000	4.95326	2400000	27.09	1.37894	5.26237	0.56428	0.184457	0.5078	0.915407	0.270483								5.26237	1.37894	27.09	60.7951	2400000	4.95326	3110
5	2007	0.977161	25.2387	42.7653	BGR	-0.394024	0.155255	0.0558398	0	0	0	0	0	1	-12903082289	71.278	53.9232	1.61729	5888.78	2.898	0.0211028	Bulgaria	35.5003	70.2965	9900000	8.14967	2300000	33.64	1.9169	5.3874	0.56809	0.114953	0.49637	0.920813	0.288777								5.3874	1.9169	33.64	70.2965	2300000	8.14967	3252.6
5	2008	0.9967	25.2387	42.7653	BGR	-0.38746	0.150125	0.0567443	0	0	0	0	0	1	-9179244610	71.622	53.2163	1.64904	7271.4	2.934	0.0135703	Bulgaria	36.427	78.1705	10400000	10.991	2190000	39.67	2.17401	4.95636	0.5719	0.04545	0.48494	0.92622	0.30707	Bulgaria	43	0.5719	0.04545	0.48494	0.92622	0.30707	4.95636	2.17401	39.67	78.1705	2190000	10.991	3360.6
5	2009	0.931774	25.2387	42.7653	BGR	-0.308047	0.0948932	0.0682633	0	0	0	0	0	1	-3535417639	71.963	56.0934	1.59502	6988.23	3.683	0.0206463	Bulgaria	35.2361	79.0115	10500000	13.0723	2210000	45	3.01692	5.69773	0.56546	0.172725	0.44723	0.930625	0.322055								5.69773	3.01692	45		2210000	13.0723	3253.53
5	2010	1.02034	25.2387	42.7653	BGR	-0.290881	0.0846118	0.0708932	0	0	0	0	0	1	-1253650000	72.302	59.4952	1.46722	6853	5.71268	0.0288709	Bulgaria	32.9793	79.8525	10200000	14.8141	2160000	46.23	2.46892	5.63615	0.55902	0.3	0.40952	0.93503	0.33704	Bulgaria	44	0.55902	0.3	0.40952	0.93503	0.33704	5.63615	2.46892	46.23		2160000	14.8141	3075.25
5	2011	1.09657	25.2387	42.7653	BGR	-0.267004	0.0712912	0.0746338	0	0	0	0	0	1	-1611440000	72.638	57.5895	1.35745	7849.17	3.86028	0.00288289	Bulgaria	31.4547	80.6935	10500000	16.6615	2270000	47.98	2.12888	5.6127	0.586085	0.16315	0.449855	0.891835	0.41883								5.6127	2.12888	47.98		2270000	16.6615	2965.18
5	2012	1.1054	25.2387	42.7653	BGR	-0.22078	0.0487436	0.0821486	0	0	0	0	0	1	-1378130000	72.975	57.1835	1.30671	7432.48	5.24722	0.0234148	Bulgaria	31.3219	81.5345	10800000	17.7843	2130000	51.9	1.95615	6.20418	0.61315	0.0263	0.49019	0.84864	0.50062	Bulgaria	60	0.61315	0.0263	0.49019	0.84864	0.50062	6.20418	1.95615	51.9	81.5345	2130000	17.7843	2933.95
5	2013	1.03435	25.2387	42.7653	BGR	-0.300578	0.0903472	0.0694015	0	0	0	0	0	1	-1637500000	73.313	58.1843	1.25812	7681.93	6.84064	0.0461891	Bulgaria	30.1871		10500000	19.1296	1940000	53.0615	2.34544	4.71289	0.57762	0.1406	0.363205	0.82232	0.54734								4.71289	2.34544	53.0615		1940000	19.1296	2934.93
5	2014	0.975777	25.2387	42.7653	BGR	-0.335389	0.112485	0.0641774	0	0	0	0	0	1	-211260000	73.651	58.7294	1.24485	7901.79	7.33898	0.0400839	Bulgaria	30.1153		9490000	20.0876	1820000	55.49	2.5159	4.93027	0.54209	0.2549	0.23622	0.796	0.59406	Bulgaria	73	0.54209	0.2549	0.23622	0.796	0.59406	4.93027	2.5159	55.49		1820000	20.0876	2981.38
5	2015	1.00587	25.2387	42.7653	BGR	-0.123764	0.0153176	0.0990925	0	0	0	0	0	1	-2098190000	73.99	58.2884	1.22846	7074.68	8.70545	0.0471974	Bulgaria	29.8949		9190000	22.089	1650000	56.6563	2.89683	5.15417	0.589865	0.47491	0.40072	0.791735	0.577145								5.15417	2.89683	56.6563		1650000	22.089	3031.85
5	2016	1.04447	25.2387	42.7653	BGR	0.0812568	0.00660267	0.140122	0	0	0	0	0	1	-661410000	74.329	57.6113	1.22011	7569.48	7.0052	0.0455737	Bulgaria	29.7895		8970000	23.428	1480000	59.8255	2.85251	5.37051	0.63764	0.69492	0.56522	0.78747	0.56023	Bulgaria	52	0.63764	0.69492	0.56522	0.78747	0.56023	5.37051	2.85251	59.8255		1480000	23.428	3016.75
5	2017	1.02586	25.2387	42.7653	BGR	0.201187	0.0404763	0.16741	0	0	0	0	0	1	-1511540000	74.669	57.9823	1.21244	8366.29	6.10255	0.039287	Bulgaria	29.8993		8530000	25.015	1290000	63.4101	2.75429	4.94191	0.67767	0.78286	0.66456	0.799035	0.569365								4.94191	2.75429	63.4101		1290000	25.015	3150.25
5	2018	1.05895	25.2387	42.7653	BGR	0.342776	0.117496	0.202749	0	0	0	0	0	1	-885510000	75.008	60.8551	1.21232	9446.72	8.32943	0.0509205	Bulgaria	30.1135		8390000	26.7505	1120000	64.782	3.25291	5.04977	0.7177	0.8708	0.7639	0.8106	0.5785	Bulgaria	47	0.7177	0.8708	0.7639	0.8106	0.5785	5.04977	3.25291	64.782		1120000	26.7505	3152.6
5	2019	1.04852	25.2387	42.7653	BGR	0.435828	0.189946	0.227814	0	0	0	0	0	1	-1392120000	75.347	61.4158	1.20587	9879.33	6.28995	0.0379465	Bulgaria	30.0217		8130000	28.5681	975355	67.947	3.21251	5.23544	0.75785	0.88185	0.76725	0.8257	0.68055								5.23544	3.21251	67.947		975355	28.5681	3233.05
5	2020	0.976213	25.2387	42.7653	BGR	0.537629	0.289045	0.25691	0	0	0	0	0	1	-3162440000	75.686	61.4468	1.25634	10129.8	6.37738	0.0463137	Bulgaria	30.3211		7950000	30.3053	872757	70.1625	3.42345	5.66072	0.798	0.8929	0.7706	0.8408	0.7826	Bulgaria	44	0.798	0.8929	0.7706	0.8408	0.7826	5.66072	3.42345	70.1625		872757	30.3053	3121.72
5	2021	1.02077	25.2387	42.7653	BGR	0.639149	0.408512	0.287666	0	0	0	0	0	1	-1195900000	76.025	62.2663	1.24187	12221.5	8.32734	0.0446913	Bulgaria	30.8428		7900000	32.7334	787637	75.2714	3.32433	5.89362	0.83815	0.90395	0.77395	0.8559	0.88465								5.89362	3.32433	75.2714		787637	32.7334	3076.45
6	2006	3.13325	17.784	44.1742	BIH	-0.861262	0.741773	0.0101234	0	0	0	0	0	1	-7.64132e+08	44.282	52.5945	1.42618	3170.12	5.798	0.0380251	Bosnia and Herzegovina	30.7594		1890000	0.985686	989000	25.1224	0.21548	3.58611	0.418227	0.04088	0.28015	0.851473	0.124643								3.58611	0.21548	25.1224		989000	0.985686	810.792
6	2007	1.0662	17.784	44.1742	BIH	-0.82029	0.672875	0.0126594	0	0	0	0	0	1	-1777373275	44.601	52.54	1.48424	3936.94	3.961	0.0239553	Bosnia and Herzegovina	32.5799		2450000	2.11311	1060000	27.92	0.2143	3.27373	0.434563	0.06589	0.28723	0.862947	0.156687								3.27373	0.2143	27.92		1060000	2.11311	849.57
6	2008	0.946876	17.784	44.1742	BIH	-0.742129	0.550755	0.0182824	0	0	0	0	0	1	-9.65405e+08	44.92	53.6513	1.46991	4846.78	4.818	0.0279978	Bosnia and Herzegovina	32.47		3180000	4.77913	1030000	34.66	0.25676	3.60947	0.4509	0.0909	0.29431	0.87442	0.18873	Bosnia and Herzegovina	94	0.4509	0.0909	0.29431	0.87442	0.18873	3.60947	0.25676	34.66		1030000	4.77913	890.239
6	2009	0.766832	17.784	44.1742	BIH	-0.726767	0.52819	0.0195087	0	0	0	0	0	1	-2.31999e+08	45.239	55.6401	1.42486	4542.28	6.177	0.0397024	Bosnia and Herzegovina	31.477		3260000	7.53305	998644	37.74	0.23237	3.15117	0.46034	0.066875	0.28525	0.88149	0.2196								3.15117	0.23237	37.74		998644	7.53305	859.218
6	2010	0.994406	17.784	44.1742	BIH	-0.701985	0.492782	0.021571	0	0	0	0	0	1	-3.6266e+08	45.558	55.5087	1.37292	4507.05	7.946	0.0506364	Bosnia and Herzegovina	30.8597		3110000	10.257	998615	42.75	0.14859	2.89443	0.46978	0.04285	0.27619	0.88856	0.25047	Bosnia and Herzegovina	74	0.46978	0.04285	0.27619	0.88856	0.25047	2.89443	0.14859	42.75		998615	10.257	838.64
6	2011	1.13091	17.784	44.1742	BIH	-0.643013	0.413466	0.0268948	0	0	0	0	0	1	-4.76437e+08	45.878	55.8147	1.24648	4981.04	4.344	0.025764	Bosnia and Herzegovina	28.8834		3170000	11.4943	955737	43.8877	0.13626	2.56688	0.501285	0.021425	0.324365	0.86135	0.321075								2.56688	0.13626	43.8877		955737	11.4943	816.036
6	2012	1.02622	17.784	44.1742	BIH	-0.570179	0.325104	0.0342797	0	0	0	0	0	1	-3.32376e+08	46.199	56.7862	1.26658	4688.38	4.174	0.0344858	Bosnia and Herzegovina	30.36		3360000	12.7749	929453	45.0645	0.18938	2.67578	0.53279	0	0.37254	0.83414	0.39168	Bosnia and Herzegovina	79	0.53279	0	0.37254	0.83414	0.39168	2.67578	0.18938	45.0645		929453	12.7749	813.683
6	2013	1.01198	17.784	44.1742	BIH	-0.575803	0.331549	0.0336775	0	0	0	0	0	1	-2.27033e+08	46.519	56.1571	1.24272	5025.07	7.167	0.048906	Bosnia and Herzegovina	29.8177		3490000	14.2666	891622	48.5213	0.17962	2.80067	0.50174	0.117645	0.328	0.78147	0.39574								2.80067	0.17962	48.5213		891622	14.2666	821.6
6	2014	1.03072	17.784	44.1742	BIH	-0.589656	0.347694	0.0322172	0	0	0	0	0	1	-534904936	46.84	56.7835	1.24022	5196.86	5.885	0.0370619	Bosnia and Herzegovina	30.0032		3490000	15.1889	849216	49.9177	0.16691	2.9316	0.47069	0.23529	0.28346	0.7288	0.3998	Bosnia and Herzegovina	97	0.47069	0.23529	0.28346	0.7288	0.3998	2.9316	0.16691	49.9177		849216	15.1889	812.031
6	2015	1.00685	17.784	44.1742	BIH	-0.468019	0.219042	0.0461458	0	0	0	0	0	1	-2.88356e+08	47.173	56.1755	1.21137	4599.9	5.505	0.0363517	Bosnia and Herzegovina	29.4792		3440000	18.0173	785755	52.6	0.25776	3.01921	0.49126	0.37188	0.36637	0.705155	0.402255								3.01921	0.25776	52.6		785755	18.0173	821.512
6	2016	1.01357	17.784	44.1742	BIH	-0.350211	0.122648	0.0620149	0	0	0	0	0	1	-3.09306e+08	47.518	55.4138	1.281	4858.78	5.61065	0.029379	Bosnia and Herzegovina	31.2762		3400000	19.031	784223	60.2565	0.17077	2.95547	0.51183	0.50847	0.44928	0.68151	0.40471	Bosnia and Herzegovina	92	0.51183	0.50847	0.44928	0.68151	0.40471	2.95547	0.17077	60.2565		784223	19.031	801.084
6	2017	1.02962	17.784	44.1742	BIH	-0.33988	0.115518	0.0635182	0	0	0	0	0	1	-4.08666e+08	47.876	55.6864	1.19648	5255.81	3.7801	0.0193344	Bosnia and Herzegovina	29.5057		3440000	20.3588	759351	64.892	0.15208	2.62144	0.521065	0.470535	0.43994	0.701605	0.421605								2.62144	0.15208	64.892		759351	20.3588	815.659
6	2018	1.02115	17.784	44.1742	BIH	-0.320549	0.102752	0.0663794	0	0	0	0	0	1	-5.82799e+08	48.245	54.9338	1.29368	5936.1	6.48562	0.0293031	Bosnia and Herzegovina	32.1344		3460000	21.0688	740807	70.1201	0.17251	2.63774	0.5303	0.4326	0.4306	0.7217	0.4385	Bosnia and Herzegovina	105	0.5303	0.4326	0.4306	0.7217	0.4385	2.63774	0.17251	70.1201		740807	21.0688	802.337
6	2019	1.01653	17.784	44.1742	BIH	-0.18157	0.0329676	0.0888055	0	0	0	0	0	1	-4.25945e+08	48.626	55.7306	1.27376	6011.37	6.31219	0.0325104	Bosnia and Herzegovina	31.7118		3760000	22.1943	728322	69.9463	0.19875	2.82787	0.58375	0.51985	0.48295	0.73425	0.534								2.82787	0.19875	69.9463		728322	22.1943	820.974
6	2020	0.939546	17.784	44.1742	BIH	-0.0344576	0.00118732	0.116093	0	0	0	0	0	1	-3.60431e+08	49.02	55.8097	1.38218	6012.06	4.9	0.0200907	Bosnia and Herzegovina	33.3582		3510000	23.2167	706918	73.2118	0.16121	3.05047	0.6372	0.6071	0.5353	0.7468	0.6295	Bosnia and Herzegovina	94	0.6372	0.6071	0.5353	0.7468	0.6295	3.05047	0.16121	73.2118		706918	23.2167	813.085
6	2021	1.77231	17.784	44.1742	BIH	0.0957439	0.00916689	0.14329	0	0	0	0	0	1	-5.56145e+08	49.425	54.8948	1.38116	7143.31	7.191	0.0352049	Bosnia and Herzegovina	34.3021	63.5911	3730000	24.3934	689295	75.6762	0.16381	2.68754	0.69065	0.69435	0.58765	0.75935	0.725								2.68754	0.16381	75.6762	63.5911	689295	24.3934	823.599
7	2006	3.09543	28.0536	53.5424	BLR	-0.642342	0.412604	0.0269587	0	0	0	0	1	0	-354100000	72.816	40.8329	1.51683	3847.43	0.065	0.0179979	Belarus	32.7144		5960000	0.115639	3370000	16.2	0.47695	2.60735	0.528327	0.210193	0.43489	0.953233	0.198813								2.60735	0.47695	16.2		3370000	0.115639	4344.4
7	2007	0.936583	28.0536	53.5424	BLR	-0.673822	0.454036	0.0240403	0	0	0	0	1	0	-1792100000	73.273	40.4715	1.48679	4735.66	0.069	0.0178838	Belarus	32.6359		6960000	1.72813	3670000	19.7	0.42036	2.16569	0.524813	0.150547	0.38132	0.956467	0.240557								2.16569	0.42036	19.7		3670000	1.72813	4434.05
7	2008	0.95793	28.0536	53.5424	BLR	-0.690572	0.476889	0.0225555	0	0	0	0	1	0	-2157300000	73.726	37.9914	1.48014	6377.37	0.073	0.0092795	Belarus	32.6959		8130000	4.88341	3720000	23	0.33733	2.01166	0.5213	0.0909	0.32775	0.9597	0.2823	Belarus	56	0.5213	0.0909	0.32775	0.9597	0.2823	2.01166	0.33733	23		3720000	4.88341	4523.7
7	2009	0.914699	28.0536	53.5424	BLR	-0.65716	0.431859	0.0255642	0	0	0	0	1	0	-1774200000	74.172	42.1729	1.45808	5352.58	0.105	0.0181552	Belarus	32.2109		9690000	11.1941	3980000	27.43	0.40007	1.85483	0.50563	0.166875	0.314665	0.962815	0.245185								1.85483	0.40007	27.43		3980000	11.1941	4613.35
7	2010	0.988796	28.0536	53.5424	BLR	-0.604877	0.365876	0.03065	0	0	0	0	1	0	-1342800000	74.672	43.475	1.43032	6033.69	0.121	0.012591	Belarus	32.1501		10300000	17.1263	4140000	31.8	0.49912	2.42585	0.48996	0.24285	0.30158	0.96593	0.20807	Belarus	64	0.48996	0.24285	0.30158	0.96593	0.20807	2.42585	0.49912	31.8		4140000	17.1263	4703
7	2011	0.991216	28.0536	53.5424	BLR	-0.493315	0.24336	0.0430436	0	0	0	0	1	0	-3876900000	75.188	44.1312	1.38175	6527.17	0.123	0.0226455	Belarus	32.0179		10700000	21.614	4210000	39.6489	0.37796	1.7071	0.54948	0.160875	0.35667	0.938955	0.35566								1.7071	0.37796	39.6489		4210000	21.614	4657.55
7	2012	0.947514	28.0536	53.5424	BLR	-0.33519	0.112352	0.0642066	0	0	0	0	1	0	-1308100000	75.697	43.2936	1.32625	6953.13	0.169	0.0301355	Belarus	31.7901		10700000	26.1183	4410000	46.91	0.63174	2.4384	0.609	0.0789	0.41176	0.91198	0.50325	Belarus	61	0.609	0.0789	0.41176	0.91198	0.50325	2.4384	0.63174	46.91		4410000	26.1183	4612.1
7	2013	1.02994	28.0536	53.5424	BLR	-0.24167	0.0584045	0.0787077	0	0	0	0	1	0	-1983900000	76.199	45.4221	1.31231	7998.13	0.265	0.0266053	Belarus	31.4875	89.9263	11100000	28.7463	4470000	54.17	0.66388	3.61886	0.607145	0.21592	0.367295	0.89904	0.55508								3.61886	0.66388	54.17	89.9263	4470000	28.7463	4578.4
7	2014	1.03158	28.0536	53.5424	BLR	-0.221616	0.0491137	0.0820094	0	0	0	0	1	0	-1788600000	76.693	45.6523	1.29048	8341.4	0.254	0.0156119	Belarus	31.2189	91.3404	11400000	27.6916	4510000	59.02	0.56401	3.16772	0.60529	0.35294	0.32283	0.8861	0.60691	Belarus	55	0.60529	0.35294	0.32283	0.8861	0.60691	3.16772	0.56401	59.02	91.3404	4510000	27.6916	4550.5
7	2015	1.02435	28.0536	53.5424	BLR	-0.112186	0.0125858	0.101221	0	0	0	0	1	0	-1545700000	77.181	47.7422	1.27655	5967.05	0.28	0.0130602	Belarus	31.0654	92.0166	11400000	29.9311	4540000	62.2304	0.5241	2.87742	0.63389	0.45613	0.40417	0.878845	0.61864								2.87742	0.5241	62.2304	92.0166	4540000	29.9311	4496
7	2016	1.0096	28.0536	53.5424	BLR	0.0305072	0.00093069	0.129306	0	0	0	0	1	0	-1124000000	77.661	48.523	1.27023	5039.68	0.391	0.0154877	Belarus	31.0133	96.0148	11400000	31.5976	4520000	71.113	0.61645	3.25451	0.66249	0.55932	0.48551	0.87159	0.63037	Belarus	49	0.66249	0.55932	0.48551	0.87159	0.63037	3.25451	0.61645	71.113	96.0148	4520000	31.5976	4861.79
7	2017	1.121	28.0536	53.5424	BLR	0.209579	0.0439232	0.16941	0	0	0	0	1	0	-1208500000	78.134	47.6337	1.27054	5785.67	0.75	0.0173862	Belarus	31.3321	96.6303	11400000	32.5847	4500000	74.4364	0.70299	3.2678	0.713295	0.72066	0.610805	0.869845	0.659235								3.2678	0.70299	74.4364	96.6303	4500000	32.5847	4901.83
7	2018	1.04625	28.0536	53.5424	BLR	0.397743	0.158199	0.217379	0	0	0	0	1	0	-1371300000	78.595	47.8105	1.27585	6360.06	0.77076	0.00524386	Belarus	31.6915	97.1604	11600000	33.0204	4490000	79.1299	0.74578	3.60652	0.7641	0.882	0.7361	0.8681	0.6881	Belarus	38	0.7641	0.882	0.7361	0.8681	0.6881	3.60652	0.74578	79.1299	97.1604	4490000	33.0204	4896.7
7	2019	1.00822	28.0536	53.5424	BLR	0.426024	0.181497	0.225105	0	0	0	0	1	0	-1277100000	79.044	48.4267	1.28751	6837.72	1.00752	0.00232797	Belarus	32.0541	97.4218	11600000	33.2322	4450000	82.7892	0.80623	3.69681	0.78625	0.816	0.721	0.87965	0.7581								3.69681	0.80623	82.7892	97.4218	4450000	33.2322	4909.11
7	2020	0.993859	28.0536	53.5424	BLR	0.458942	0.210628	0.234267	0	0	0	0	1	0	-1310500000	79.483	49.5348	1.33338	6542.8	1.342	0.0111191	Belarus	32.1804	97.9332	11700000	33.7932	4410000	85.0879	1.0189	3.91042	0.8084	0.75	0.7059	0.8912	0.8281	Belarus	40	0.8084	0.75	0.7059	0.8912	0.8281	3.91042	1.0189	85.0879	97.9332	4410000	33.7932	4885.41
7	2021	0.998563	28.0536	53.5424	BLR	0.470583	0.221448	0.237551	0	0	0	0	1	0	-1309906223	79.91	48.3064	1.31065	7302.26	1.34661	0.0112463	Belarus	32.5511	98.2921	11800000	33.8152	4330000	86.89	1.09393	3.60658	0.83055	0.684	0.6908	0.90275	0.8981								3.60658	1.09393	86.89	98.2921	4330000	33.8152	4850.65
9	2006	2.1835	33.2349	35.0492	CYP	-0.0613937	0.00376919	0.110824	0	1	0	0	0	0	-9.74111e+08	68.125	66.9929	1.04996	26729.3	0.001	9.919e-06	Cyprus	22.6451	88.0951	867785	8.32353	408319	35.83	14.4395	7.46188	0.592113	0.0832067	0.467107	0.894623	0.415907								7.46188	14.4395	35.83	88.0951	408319	8.32353	357.281
9	2007	0.920722	33.2349	35.0492	CYP	-0.2396	0.057408	0.0790455	0	1	0	0	0	0	-1032003154	67.982	66.0996	1.02592	31244.9	0.003	2.9652e-05	Cyprus	22.5194	91.1598	988312	12.5725	409279	40.77	6.20568	5.20765	0.597007	0.0870533	0.472683	0.899247	0.421673								5.20765	6.20568	40.77	91.1598	409279	12.5725	377.948
9	2008	0.92563	33.2349	35.0492	CYP	-0.198009	0.0392077	0.0859829	0	1	0	0	0	0	2072036810	67.839	66.3693	1.04328	35397.4	0.015	0.00014781	Cyprus	23.0458	90.6115	1020000	18.4811	413323	42.31	6.8075	4.66475	0.6019	0.0909	0.47826	0.90387	0.42744	Cyprus	35	0.6019	0.0909	0.47826	0.90387	0.42744	4.66475	6.8075	42.31	90.6115	413323	18.4811	382.852
9	2009	0.953873	33.2349	35.0492	CYP	-0.087222	0.00760767	0.105886	0	1	0	0	0	0	-2995359578	67.695	69.9769	0.987796	32109.2	0.031	0.00030256	Cyprus	21.8217	92.0514	977521	21.4899	414512	49.81	8.97902	5.18785	0.586215	0.288305	0.42484	0.9087	0.43005								5.18785	8.97902	49.81		414512	21.4899	382.918
9	2010	1.09087	33.2349	35.0492	CYP	-0.0620069	0.00384486	0.110705	0	1	0	0	0	0	6.81923e+08	67.551	71.6414	0.907694	31105.4	0.074	0.000721944	Cyprus	20.4027	93.4914	1030000	23.1549	413192	52.99	9.16512	4.68944	0.57053	0.48571	0.37142	0.91353	0.43266	Cyprus	42	0.57053	0.48571	0.37142	0.91353	0.43266	4.68944	9.16512	52.99		413192	23.1549	395.223
9	2011	1.06558	33.2349	35.0492	CYP	-0.0856738	0.00734	0.106179	0	1	0	0	0	0	6927315537	67.406	73.9856	0.901855	32486.4	0.179	0.00173916	Cyprus	20.8978	94.9313	1090000	24.6113	405024	56.8599	5.64087	4.55895	0.61067	0.282305	0.466755	0.89431	0.47396								4.55895	5.64087	56.8599		405024	24.6113	398.214
9	2012	1.04814	33.2349	35.0492	CYP	-0.0948513	0.00899677	0.104449	0	1	0	0	0	0	5274931528	67.261	74.9483	0.841491	28993.3	0.257	0.00244561	Cyprus	20.1706	96.3712	1110000	25.4741	373196	60.6899	3.48186	4.10814	0.65081	0.0789	0.56209	0.87509	0.51526	Cyprus	45	0.65081	0.0789	0.56209	0.87509	0.51526	4.10814	3.48186	60.6899	96.3712	373196	25.4741	385.227
9	2013	1.20643	33.2349	35.0492	CYP	-0.0789665	0.00623571	0.107452	0	1	0	0	0	0	3885092659	67.137	76.1139	0.731956	27799.1	0.33	0.00314853	Cyprus	17.5625	96.7193	1100000	26.7127	349108	65.4548	3.88273	4.44352	0.623285	0.19631	0.517265	0.828945	0.523645								4.44352	3.88273	65.4548		349108	26.7127	365.078
9	2014	1.32217	33.2349	35.0492	CYP	-0.120493	0.0145187	0.0996914	0	1	0	0	0	0	14314297363	67.031	75.8274	0.682778	27245.4	0.314	0.00298614	Cyprus	16.5176	97.0675	1110000	28.7616	327874	69.33	2.93078	3.60834	0.59576	0.31372	0.47244	0.7828	0.53203	Cyprus	58	0.59576	0.31372	0.47244	0.7828	0.53203	3.60834	2.93078	69.33		327874	28.7616	362.741
9	2015	1.24377	33.2349	35.0492	CYP	-0.0402734	0.00162195	0.114945	0	1	0	0	0	0	15284627941	66.946	75.5176	0.666735	23487.1	0.399515	0.00372308	Cyprus	16.2252	97.4156	1110000	30.725	323707	71.7157	3.55513	3.87565	0.59901	0.41957	0.504335	0.7805	0.512185								3.87565	3.55513	71.7157		323707	30.725	358.202
9	2016	1.15067	33.2349	35.0492	CYP	0.0397381	0.00157912	0.131241	0	1	0	0	0	0	-2086206013	66.881	74.5691	0.698341	24715.7	0.424639	0.00392027	Cyprus	17.0503	97.7637	1130000	32.5787	320573	75.9002	4.80202	3.55365	0.60226	0.52542	0.53623	0.7782	0.49234	Cyprus	64	0.60226	0.52542	0.53623	0.7782	0.49234	3.55365	4.80202	75.9002		320573	32.5787	363.06
9	2017	0.817461	33.2349	35.0492	CYP	0.276594	0.0765041	0.185809	0	1	0	0	0	0	-578113094	66.836	74.1425	0.691285	26697.2	0.43546	0.00401189	Cyprus	17.0474	98.1118	1180000	34.215	317241	80.7432	4.90636	3.43761	0.68793	0.67281	0.660465	0.79325	0.61012								3.43761	4.90636	80.7432		317241	34.215	379.622
9	2018	0.749207	33.2349	35.0492	CYP	0.504768	0.254791	0.247327	0	1	0	0	0	0	-6432932085	66.81	73.262	0.670746	29418.9	0.477533	0.00434746	Cyprus	16.661	98.46	1200000	35.8108	311559	84.4336	4.47373	3.50109	0.7736	0.8202	0.7847	0.8083	0.7279	Cyprus	36	0.7736	0.8202	0.7847	0.8083	0.7279	3.50109	4.47373	84.4336		311559	35.8108	400.878
9	2019	1.0274	33.2349	35.0492	CYP	0.600231	0.360277	0.27567	0	1	0	0	0	0	-8.83119e+08	66.805	72.9831	0.740464	29417.1	0.514832	0.00458458	Cyprus	18.4348	98.8081	1240000	36.7753	323914	86.0636	2.29766	4.06706	0.82335	0.8863	0.82765	0.8256	0.8168								4.06706	2.29766	86.0636	98.8081	323914	36.7753	416.478
9	2020	1.05299	33.2349	35.0492	CYP	0.734543	0.539554	0.31815	0	1	0	0	0	0	-8617568064	66.821	74.1625	0.808439	28036.2	0.597016	0.00523762	Cyprus	19.5113	99.2468	1240000	37.3964	311439	90.8019	1.91425	4.54334	0.8731	0.9524	0.8706	0.8429	0.9057	Cyprus	18	0.8731	0.9524	0.8706	0.8429	0.9057	4.54334	1.91425	90.8019	99.2468	311439	37.3964	417.354
9	2021	0.914243	33.2349	35.0492	CYP	0.860076	0.73973	0.360604	0	1	0	0	0	0	-5275522957	66.856	73.2249	0.721741	31551.8	0.777436	0.00682045	Cyprus	17.925		1320000	38.3755	304581	90.7595	2.07639	4.71026	0.92285	1.0185	0.91355	0.8602	0.9946								4.71026	2.07639	90.7595		304581	38.3755	431.716
10	2006	2.69024	15.3345	49.7391	CZE	0.292396	0.0854951	0.189787	0	0	0	0	0	1	-4042665554	73.533	54.3915	1.8532	15261.8	3.502	-0.0148896	Czechia	39.9692	87.8461	12400000	10.7959	2890000	47.93	12.9596	13.5561	0.649567	0.20574	0.607467	0.925393	0.4161								13.5561	12.9596	47.93	87.8461	2890000	10.7959	4828.06
10	2007	1.01744	15.3345	49.7391	CZE	0.393931	0.155182	0.216348	0	0	0	0	0	1	-8963737209	73.463	54.2919	1.8322	18466.5	3.397	-0.0234608	Czechia	40.2179	90.1413	13200000	14.4781	2400000	51.93	13.9009	14.7354	0.659583	0.20514	0.626473	0.930787	0.42201								14.7354	13.9009	51.93	90.1413	2400000	14.4781	4921.99
10	2008	0.969373	15.3345	49.7391	CZE	0.445455	0.19843	0.230491	0	0	0	0	0	1	-2257634944	73.394	55.1494	1.83458	22804.6	3.711	-0.0106205	Czechia	40.5256	92.5281	13800000	16.954	2480000	62.97	14.1105	14.1852	0.6696	0.20454	0.64548	0.93618	0.42792	Czech Republic	25	0.6696	0.20454	0.64548	0.93618	0.42792	14.1852	14.1105	62.97	92.5281	2480000	16.954	5002.5
10	2009	0.917477	15.3345	49.7391	CZE	0.424022	0.179795	0.224553	0	0	0	0	0	1	-1951523283	73.324	55.7403	1.746	19861.7	4.63	-0.00208414	Czechia	38.5713	93.3936	13100000	19.5376	2530000	64.43	14.4444	15.6966	0.63781	0.166555	0.54972	0.93954	0.42686								15.6966	14.4444	64.43		2530000	19.5376	4934.27
10	2010	1.0443	15.3345	49.7391	CZE	0.428347	0.183481	0.225745	0	0	0	0	0	1	-4918465928	73.255	55.7882	1.69001	19960.1	5.91	0.00683009	Czechia	37.9872	94.259	12900000	21.6076	2370000	68.82	15.0108	17.787	0.60602	0.12857	0.45396	0.9429	0.4258	Czech Republic	33	0.60602	0.12857	0.45396	0.9429	0.4258	17.787	15.0108	68.82		2370000	21.6076	4885.24
10	2011	1.05831	15.3345	49.7391	CZE	0.46283	0.214211	0.235361	0	0	0	0	0	1	-2592551186	73.185	54.6823	1.65945	21871.3	7.285	0.0136554	Czechia	38.4528	95.1245	13200000	23.9044	2200000	70.49	15.3284	15.8158	0.62758	0.195885	0.49822	0.91637	0.470455								15.8158	15.3284	70.49		2200000	23.9044	4872.41
10	2012	0.990145	15.3345	49.7391	CZE	0.499118	0.249119	0.245697	0	0	0	0	0	1	-6180626420	73.197	54.7651	1.59045	19870.8	8.083	0.0181268	Czechia	38.1231	95.99	13500000	25.2779	2120000	73.43	14.5308	14.7311	0.64914	0.2632	0.54248	0.88984	0.51511	Czech Republic	46	0.64914	0.2632	0.54248	0.88984	0.51511	14.7311	14.5308	73.43	95.99	2120000	25.2779	4890.05
10	2013	1.01746	15.3345	49.7391	CZE	0.397549	0.158045	0.217326	0	0	0	0	0	1	3.79979e+08	73.29	54.6147	1.56338	20133.2	9.319	0.0304817	Czechia	37.5115	96.3417	13700000	27.164	2000000	74.1104	13.1118	13.7249	0.628045	0.25905	0.456275	0.88267	0.545215								13.7249	13.1118	74.1104		2000000	27.164	4937.08
10	2014	1.04691	15.3345	49.7391	CZE	0.364439	0.132816	0.208454	0	0	0	0	0	1	-4014531794	73.384	54.1933	1.57241	19890.9	9.214	0.0255227	Czechia	38.0395	96.6933	13900000	28.4755	2000000	74.2317	13.4191	14.1135	0.60695	0.2549	0.37007	0.8755	0.57532	Czech Republic	53	0.60695	0.2549	0.37007	0.8755	0.57532	14.1135	13.4191	74.2317		2000000	28.4755	4974.3
10	2015	1.05597	15.3345	49.7391	CZE	0.500789	0.25079	0.246179	0	0	0	0	0	1	2026234172	73.477	54.0574	1.56256	17829.7	9.454	0.0418694	Czechia	38.0255	97.045	12500000	27.9996	1910000	75.6688	13.536	15.6296	0.62616	0.40711	0.424165	0.86908	0.58525								15.6296	13.536	75.6688		1910000	27.9996	5041.9
10	2016	0.986511	15.3345	49.7391	CZE	0.544261	0.29622	0.258866	0	0	0	0	0	1	-7711369348	73.57	54.4522	1.55932	18575.2	9.41741	0.0478978	Czechia	38.0713	97.3966	12500000	29.1612	1760000	76.4812	12.715	14.2435	0.64537	0.55932	0.47826	0.86266	0.59518	Czech Republic	50	0.64537	0.55932	0.47826	0.86266	0.59518	14.2435	12.715	76.4812		1760000	29.1612	5138.58
10	2017	1.01683	15.3345	49.7391	CZE	0.678674	0.460598	0.30011	0	0	0	0	0	1	-1834383759	73.675	55.0962	1.54327	20636.2	9.66066	0.0337349	Czechia	38.0578	97.7483	12600000	29.8737	1640000	78.7192	13.3346	15.3324	0.676885	0.58866	0.56553	0.86893	0.59614								15.3324	13.3346	78.7192	97.7483	1640000	29.8737	5221.6
10	2018	1.03519	15.3345	49.7391	CZE	0.83229	0.692706	0.350978	0	0	0	0	0	1	-2244655309	73.792	56.4117	1.5096	23424.5	9.44341	0.0284076	Czechia	37.4976	95.9947	12700000	30.5929	1510000	80.6882	15.1039	16.3308	0.7084	0.618	0.6528	0.8752	0.5971	Czech Republic	54	0.7084	0.618	0.6528	0.8752	0.5971	16.3308	15.1039	80.6882	95.9947	1510000	30.5929	5293.79
10	2019	0.995582	15.3345	49.7391	CZE	1.02086	1.04215	0.418862	0	0	0	0	0	1	-5975777816	73.921	56.9636	1.49621	23664.8	10.0871	0.0347423	Czechia	37.2499	96.8587	13100000	35.4907	1490000	80.8669	16.1705	17.3949	0.76095	0.6721	0.68815	0.8891	0.70555								17.3949	16.1705	80.8669	96.8587	1490000	35.4907	5303.1
10	2020	0.927453	15.3345	49.7391	CZE	1.25022	1.56305	0.509516	0	0	0	0	0	1	-6428184038	74.061	58.3677	1.54325	22992.9	10.4083	0.0483963	Czechia	37.2455	98.7804	13000000	36.5155	1340000	81.3389	17.9557	20.0955	0.8135	0.7262	0.7235	0.903	0.814	Czech Republic	39	0.8135	0.7262	0.7235	0.903	0.814	20.0955	17.9557	81.3389	98.7804	1340000	36.5155	5107.83
10	2021	1.01927	15.3345	49.7391	CZE	1.23387	1.52244	0.50276	0	0	0	0	0	1	-2.52852e+08	74.214	58.7537	1.48377	26821.2	10.1301	0.0415463	Czechia	36.8507	98.7626	13300000	37.5696	1300000	82.6706	15.5069	16.888	0.86605	0.7803	0.75885	0.9169	0.92245								16.888	15.5069	82.6706	98.7626	1300000	37.5696	5071.83
11	2006	2.83765	29.7819	26.5616	EGY	-0.791746	0.626862	0.0145934	0	1	0	0	0	0	-9894400000	43.073	44.69	1.02458	1332.34	13.7452	0.121512	Egypt	22.0977		18000000	0.320634	10800000	13.66	0.10287	4.20877	0.41176	0.13624	0.499217	0.657433	0.0773567								4.20877	0.10287	13.66		10800000	0.320634	20302.5
11	2007	0.969495	29.7819	26.5616	EGY	-0.7002	0.49028	0.0217235	0	1	0	0	0	0	-10913300000	43.078	46.894	1.00975	1586.47	16.5262	0.149194	Egypt	22.1646		30100000	0.580685	11200000	16.03	0.03233	4.28866	0.44423	0.19312	0.552283	0.694867	0.0829833								4.28866	0.03233	16.03		11200000	0.580685	21528
11	2008	0.944337	29.7819	26.5616	EGY	-0.620584	0.385124	0.0290736	0	1	0	0	0	0	-7574400000	43.058	46.6683	1.03696	1941.9	15.7772	0.141193	Egypt	22.9063		41300000	0.918058	11900000	18.01	0.33888	3.69897	0.4767	0.25	0.60535	0.7323	0.08861	Egypt	79	0.4767	0.25	0.60535	0.7323	0.08861	3.69897	0.33888	18.01		11900000	0.918058	22507.3
11	2009	0.928406	29.7819	26.5616	EGY	-0.65356	0.427141	0.0258995	0	1	0	0	0	0	-6140400000	43.039	46.5661	1.07535	2212.22	14.1772	0.125384	Egypt	23.7559		55400000	1.26021	10300000	20	0.16641	3.22559	0.46425	0.267855	0.56775	0.714815	0.10708								3.22559	0.16641	20		10300000	1.26021	22975.3
11	2010	1.03119	29.7819	26.5616	EGY	-0.655816	0.430095	0.0256891	0	1	0	0	0	0	-5210100000	43.019	46.2327	1.12925	2509.77	14.934	0.133593	Egypt	25.3827		70700000	1.66371	9620000	21.6	0.13505	3.74802	0.4518	0.28571	0.53015	0.69733	0.12555	Egypt	86	0.4518	0.28571	0.53015	0.69733	0.12555	3.74802	0.13505	21.6		9620000	1.66371	23829
11	2011	1.00456	29.7819	26.5616	EGY	-0.567453	0.322003	0.0345735	0	1	0	0	0	0	1108200000	43	45.716	1.01728	2645.62	14.868	0.135091	Egypt	23.5724		83400000	2.06866	8710000	25.6	0.22681	3.54254	0.45646	0.484955	0.565725	0.628085	0.174375								3.54254	0.22681	25.6		8710000	2.06866	23345.8
11	2012	0.994033	29.7819	26.5616	EGY	-0.485672	0.235877	0.0439695	0	1	0	0	0	0	-2586600000	42.946	51.7716	1.03713	3059.14	14.661	0.135947	Egypt	24.8599		96800000	2.50851	8560000	26.4	0.23972	3.42974	0.46112	0.6842	0.6013	0.55884	0.2232	Egypt	107	0.46112	0.6842	0.6013	0.55884	0.2232	3.42974	0.23972	26.4		8560000	2.50851	23564.4
11	2013	1.03339	29.7819	26.5616	EGY	-0.448061	0.200758	0.0486695	0	1	0	0	0	0	-3891200000	42.893	52.3007	1.00485	3088.89	14.98	0.139946	Egypt	24.1104	77.6654	99700000	2.86606	6820000	29.4	0.42388	3.55158	0.487025	0.616605	0.595925	0.57502	0.290125								3.55158	0.42388	29.4	77.6654	6820000	2.86606	23975.1
11	2014	1.05845	29.7819	26.5616	EGY	-0.34753	0.120777	0.0624033	0	1	0	0	0	0	-4359500000	42.839	52.321	1.0089	3196.86	15.693	0.144413	Egypt	24.4072	80.9789	95300000	3.20934	6320000	33.8946	2.83808	4.2224	0.51293	0.54901	0.59055	0.5912	0.35705	Egypt	80	0.51293	0.54901	0.59055	0.5912	0.35705	4.2224	2.83808	33.8946	80.9789	6320000	3.20934	24331.2
11	2015	1.072	29.7819	26.5616	EGY	-0.390732	0.152672	0.0562924	0	1	0	0	0	0	-6743500000	42.785	53.1706	1.03073	3370.38	15.954	0.145036	Egypt	25.0832	86.7007	94000000	3.91554	6240000	37.8194	3.69912	4.47338	0.48617	0.477895	0.53078	0.59798	0.329755								4.47338	3.69912	37.8194	86.7007	6240000	3.91554	24778.8
11	2016	1.00769	29.7819	26.5616	EGY	-0.483738	0.234003	0.0442054	0	1	0	0	0	0	-7900200000	42.732	54.4833	1.04454	3331.61	15.813	0.144502	Egypt	25.5029	89.3469	97800000	4.47884	6120000	41.2481	2.82125	4.21387	0.45941	0.40678	0.47101	0.60476	0.30246	Egypt	108	0.45941	0.40678	0.47101	0.60476	0.30246	4.21387	2.82125	41.2481	89.3469	6120000	4.47884	25331.2
11	2017	0.951797	29.7819	26.5616	EGY	-0.422163	0.178222	0.0520445	0	1	0	0	0	0	-7209700000	42.705	53.2409	1.07716	2315.9	15.8434	0.142299	Egypt	26.5633	98.037	103000000	5.14186	6600000	44.9502	2.93262	4.01041	0.473705	0.47304	0.502855	0.60598	0.31233								4.01041	2.93262	44.9502	98.037	6600000	5.14186	26006.2
11	2018	0.982052	29.7819	26.5616	EGY	-0.340054	0.115637	0.0634927	0	1	0	0	0	0	-7817811000	42.704	51.5017	1.08155	2407.09	17.629	0.156816	Egypt	26.8652	99.435	93800000	6.38555	7870000	46.9243	2.40454	5.0694	0.488	0.5393	0.5347	0.6072	0.3222	Egypt	114	0.488	0.5393	0.5347	0.6072	0.3222	5.0694	2.40454	46.9243	99.435	7870000	6.38555	26021
11	2019	0.992984	29.7819	26.5616	EGY	-0.228122	0.0520397	0.0809308	0	1	0	0	0	0	-8605068000	42.73	50.4717	1.14914	2869.58	21.109	0.184308	Egypt	28.6093	99.3777	95300000	7.17027	8760000	57.2829	2.86874	5.64677	0.52035	0.5256	0.55265	0.6132	0.39525								5.64677	2.86874	57.2829	99.3777	8760000	7.17027	26122.6
11	2020	1.03971	29.7819	26.5616	EGY	-0.171379	0.0293707	0.0905781	0	1	0	0	0	0	-5525300000	42.783	51.7605	1.18074	3398.8	21.157	0.183421	Egypt	28.4964	99.4072	95400000	8.68664	9860000	71.9142	2.95061	3.98744	0.5527	0.5119	0.5706	0.6192	0.4683	Egypt	111	0.5527	0.5119	0.5706	0.6192	0.4683	3.98744	2.95061	71.9142	99.4072	9860000	8.68664	26199
11	2021	1.01097	29.7819	26.5616	EGY	-0.0857823	0.00735859	0.106159	0	1	0	0	0	0	-4755300000	42.862	52.2299	1.17106	3698.83	23.3636	0.202613	Egypt	29.0841		103000000	9.91731	11000000	72.06	2.8825	4.84629	0.58505	0.4982	0.58855	0.6252	0.54135								4.84629	2.8825	72.06		11000000	9.91731	26275.4
12	2006	1.61812	25.5495	58.6732	EST	0.576832	0.332735	0.26858	0	0	0	0	0	1	-3.12039e+08	68.607	57.8681	1.55515	12639.4	0.13	-0.00129149	Estonia	33.541	88.6663	1660000	18.3262	451912	63.51	13.0486	9.85973	0.743153	0.655117	0.701557	0.977813	0.550623								9.85973	13.0486	63.51	88.6663	451912	18.3262	651.705
12	2007	1.01523	25.5495	58.6732	EST	0.395068	0.156079	0.216655	0	0	0	0	0	1	-6.45707e+08	68.479	57.0638	1.60032	16744.6	0.145	-0.00681498	Estonia	35.1279	92.8811	1680000	19.7638	495492	66.19	6.21619	6.67264	0.751577	0.691193	0.706963	0.975627	0.573197								6.67264	6.21619	66.19	92.8811	495492	19.7638	657.591
12	2008	0.824499	25.5495	58.6732	EST	0.418091	0.1748	0.222924	0	0	0	0	0	1	-6.87425e+08	68.351	59.5514	1.59654	18205	0.197	-0.00125692	Estonia	35.2672	92.6388	1620000	22.0387	498129	70.58	5.42183	6.2782	0.76	0.72727	0.71237	0.97344	0.59577	Estonia	13	0.76	0.72727	0.71237	0.97344	0.59577	6.2782	5.42183	70.58	92.6388	498129	22.0387	656.006
12	2009	1.13383	25.5495	58.6732	EST	0.314209	0.0987271	0.195346	0	0	0	0	0	1	-5.03313e+08	68.223	60.8484	1.42327	14711.7	0.5411	0.00556772	Estonia	31.4419	90.5343	1570000	23.5004	492759	72.5	4.73078	5.60366	0.728265	0.70649	0.606975	0.970035	0.61153								5.60366	4.73078	72.5		492759	23.5004	593.894
12	2010	1.12327	25.5495	58.6732	EST	0.423693	0.179516	0.224463	0	0	0	0	0	1	-1350833077	68.094	59.922	1.3488	14663	1.0441	-0.00091249	Estonia	30.3176	88.4297	1650000	26.1265	482211	74.1	7.95131	9.63591	0.69653	0.68571	0.50158	0.96663	0.62729	Estonia	20	0.69653	0.68571	0.50158	0.96663	0.62729	9.63591	7.95131	74.1		482211	26.1265	567.97
12	2011	1.71918	25.5495	58.6732	EST	0.686633	0.471465	0.302648	0	0	0	0	0	1	-2490397606	67.965	58.2904	1.39973	17487.8	1.1792	-0.000686725	Estonia	32.4345	86.3251	1810000	26.2874	471908	76.5	11.4748	11.4262	0.74763	0.724455	0.66255	0.93755	0.64575								11.4262	11.4748	76.5		471908	26.2874	603.197
12	2012	0.549258	25.5495	58.6732	EST	0.793273	0.629282	0.337681	0	0	0	0	0	1	-5.05877e+08	67.974	58.8033	1.2976	17403.2	1.4773	0.00642517	Estonia	31.1035	84.2206	2000000	26.4241	448212	78.3899	10.9029	10.5431	0.79873	0.7632	0.82352	0.90847	0.66421	Estonia	20	0.79873	0.7632	0.82352	0.90847	0.66421	10.5431	10.9029	78.3899	84.2206	448212	26.4241	614.925
12	2013	0.987923	25.5495	58.6732	EST	0.828647	0.686655	0.349726	0	0	0	0	0	1	-2.46699e+08	68.122	59.1739	1.26172	19056	1.281	-1.39561e-05	Estonia	30.2735		1930000	27.3864	426490	80.0043	11.6114	10.5975	0.808345	0.76395	0.797585	0.898685	0.72879								10.5975	11.6114	80.0043		426490	27.3864	621.339
12	2014	1.38567	25.5495	58.6732	EST	0.90344	0.816203	0.375887	0	0	0	0	0	1	-6.45748e+08	68.269	59.2652	1.24621	20261.1	1.465	0.00454186	Estonia	30.1482		1900000	28.2238	407289	84.2415	12.7982	11.5012	0.81796	0.7647	0.77165	0.8889	0.79337	Estonia	15	0.81796	0.7647	0.77165	0.8889	0.79337	11.5012	12.7982	84.2415		407289	28.2238	624.83
12	2015	1.01017	25.5495	58.6732	EST	0.93121	0.867153	0.385841	0	0	0	0	0	1	1.40347e+08	68.416	59.9947	1.25998	17402	1.636	0.0120912	Estonia	30.6622		1900000	29.6865	387607	88.4097	11.9074	11.2111	0.8257	0.78913	0.831475	0.88249	0.76316								11.2111	11.9074	88.4097		387607	29.6865	640.884
12	2016	1.14476	25.5495	58.6732	EST	0.993242	0.98653	0.408546	0	0	0	0	0	1	-560729295	68.563	60.0342	1.21738	18295.3	1.65268	0.00830728	Estonia	29.7227		1900000	31.4971	370589	87.2402	12.5274	11.5297	0.83344	0.81356	0.8913	0.87608	0.73295	Estonia	13	0.83344	0.81356	0.8913	0.87608	0.73295	11.5297	12.5274	87.2402		370589	31.4971	644.635
12	2017	1.04525	25.5495	58.6732	EST	0.90605	0.820926	0.376817	0	0	0	0	0	1	-1085198793	68.717	60.3672	1.21504	20437.8	1.94249	0.00856846	Estonia	29.9635		1900000	32.5189	362117	88.1025	9.28219	9.40468	0.84102	0.86183	0.89705	0.87894	0.747125								9.40468	9.28219	88.1025		362117	32.5189	658.573
12	2018	0.974297	25.5495	58.6732	EST	0.900927	0.81167	0.374993	0	0	0	0	0	1	-1459135847	68.88	60.8762	1.19361	23165.8	2.0848	0.0125089	Estonia	29.6486		1920000	33.3679	345690	89.357	8.51217	8.47983	0.8486	0.9101	0.9028	0.8818	0.7613	Estonia	16	0.8486	0.9101	0.9028	0.8818	0.7613	8.47983	8.51217	89.357		345690	33.3679	664.746
12	2019	1.10964	25.5495	58.6732	EST	0.965604	0.932391	0.398349	0	0	0	0	0	1	-1198040768	69.051	61.5471	1.1529	23424.5	2.2065	0.0270093	Estonia	28.7028		1950000	33.8453	324388	90.2289	7.59259	7.46709	0.89795	0.95505	0.94845	0.9042	0.84125								7.46709	7.59259	90.2289		324388	33.8453	671.337
12	2020	0.974966	25.5495	58.6732	EST	1.11515	1.24355	0.455055	0	0	0	0	0	1	-3314322297	69.229	62.9753	1.20751	23595.2	2.58316	0.035087	Estonia	29.1426		1930000	34.2758	304728	89.0583	9.57819	7.66079	0.9473	1	0.9941	0.9266	0.9212	Estonia	3	0.9473	1	0.9941	0.9266	0.9212	7.66079	9.57819	89.0583		304728	34.2758	656.592
12	2021	0.954279	25.5495	58.6732	EST	1.24544	1.55111	0.507534	0	0	0	0	0	1	-7.90842e+08	69.415	62.5382	1.16968	27943.7	3.1547	0.0366454	Estonia	29.05		1980000	37.4429	296620	91.04	9.80072	7.60014	0.99665	1.04495	1.03975	0.949	1.00115								7.60014	9.80072	91.04		296620	37.4429	654.225
14	2006	2.50039	22.9894	39.0432	GRC	-0.355481	0.126367	0.061255	0	1	0	0	0	0	-1176469324	74.827	65.4215	1.02096	24821.9	7.645	0.0904603	Greece	22.0197	75.8624	11000000	4.39561	6170000	32.25	3.00835	5.67309	0.585333	0.13612	0.479257	0.956597	0.321723								5.67309	3.00835	32.25	75.8624	6170000	4.39561	4482.14
14	2007	1.02008	22.9894	39.0432	GRC	-0.354637	0.125767	0.0613765	0	1	0	0	0	0	3303433978	75.199	67.1773	1.02247	28864	4.593	0.0609065	Greece	22.4438	80.2925	12300000	9.17347	5470000	35.88	2.38983	5.85115	0.578567	0.11351	0.446983	0.963193	0.328667								5.85115	2.38983	35.88	80.2925	5470000	9.17347	4516.48
14	2008	0.833192	22.9894	39.0432	GRC	-0.378232	0.143059	0.0580282	0	1	0	0	0	0	-2525399819	75.568	69.8914	1.00585	32128	5.736	0.0757881	Greece	22.2189	81.9552	13800000	13.6089	5250000	38.2	2.20724	5.02701	0.5718	0.0909	0.41471	0.96979	0.33561	Greece	44	0.5718	0.0909	0.41471	0.96979	0.33561	5.02701	2.20724	38.2	81.9552	5250000	13.6089	4569.93
14	2009	0.952161	22.9894	39.0432	GRC	-0.326481	0.10659	0.0654946	0	1	0	0	0	0	-3.24725e+08	75.932	71.2964	0.956547	29828.8	8.15	0.0945928	Greece	21.1314	83.6555	13300000	17.3364	6000000	42.4	2.09483	5.27536	0.571275	0.17402	0.38513	0.975075	0.35924								5.27536	2.09483	42.4		6000000	17.3364	4510.61
14	2010	1.03075	22.9894	39.0432	GRC	-0.303956	0.0923892	0.0688856	0	1	0	0	0	0	1163732571	76.292	70.3335	0.871396	26716.6	10.622	0.123222	Greece	19.5868	85.3559	12300000	20.416	5900000	44.4	1.98651	4.82581	0.57075	0.25714	0.35555	0.98036	0.38287	Greece	41	0.57075	0.25714	0.35555	0.98036	0.38287	4.82581	1.98651	44.4		5900000	20.416	4348.28
14	2011	1.00736	22.9894	39.0432	GRC	-0.138975	0.019314	0.096331	0	1	0	0	0	0	7.2637e+08	76.649	70.1497	0.763378	25483.9	8.24331	0.0918509	Greece	17.689	87.0562	12100000	22.3929	5740000	51.65	1.97019	4.78515	0.628955	0.29962	0.465355	0.956765	0.468005								4.78515	1.97019	51.65		5740000	22.3929	4015.55
14	2012	1.23181	22.9894	39.0432	GRC	0.0203122	0.000412586	0.127185	0	1	0	0	0	0	-983789755	77.004	69.9536	0.690165	21913	9.506	0.0971263	Greece	16.5433	88.7565	13400000	24.5304	5460000	55.07	1.64939	5.08131	0.68716	0.3421	0.57516	0.93317	0.55314	Greece	37	0.68716	0.3421	0.57516	0.93317	0.55314	5.08131	1.64939	55.07	88.7565	5460000	24.5304	3655
14	2013	1.27818	22.9894	39.0432	GRC	0.0995118	0.00990259	0.144119	0	1	0	0	0	0	-3642778629	77.355	70.207	0.648463	21787.8	14.425	0.144331	Greece	15.5592		12500000	26.691	5390000	59.8663	1.35564	3.92133	0.69946	0.57301	0.590725	0.903635	0.604005								3.92133	1.35564	59.8663		5390000	26.691	3481.57
14	2014	1.15136	22.9894	39.0432	GRC	0.241598	0.0583697	0.177151	0	1	0	0	0	0	3.1893e+08	77.702	70.5923	0.619158	21616.7	12.265	0.146799	Greece	14.9786		12100000	29.0535	5320000	63.21	2.40606	4.16714	0.71176	0.80392	0.60629	0.8741	0.65487	Greece	34	0.71176	0.80392	0.60629	0.8741	0.65487	4.16714	2.40606	63.21		5320000	29.0535	3505.42
14	2015	1.19023	22.9894	39.0432	GRC	0.248876	0.0619394	0.178935	0	1	0	0	0	0	3.13664e+08	78.046	69.9938	0.613889	18083.9	14.646	0.169283	Greece	14.9392		12600000	31.8233	5260000	66.835	3.07063	4.88967	0.70138	0.707045	0.593	0.88211	0.629025								4.88967	3.07063	66.835		5260000	31.8233	3580.86
14	2016	1.16945	22.9894	39.0432	GRC	0.216351	0.0468079	0.171033	0	1	0	0	0	0	-4461888212	78.387	69.1742	0.624388	17924	15.1007	0.169442	Greece	15.2447		12500000	33.629	5200000	69.0879	3.49234	4.66771	0.691	0.61017	0.57971	0.89012	0.60318	Greece	43	0.691	0.61017	0.57971	0.89012	0.60318	4.66771	3.49234	69.0879		5200000	33.629	3640.55
14	2017	0.920675	22.9894	39.0432	GRC	0.350044	0.122531	0.204654	0	1	0	0	0	0	-3283464014	78.724	69.6627	0.624806	18582.1	13.8005	0.148472	Greece	15.408		12900000	35.3366	5180000	69.893	2.78008	4.34425	0.73715	0.743285	0.699555	0.88841	0.62354								4.34425	2.78008	69.893		5180000	35.3366	3721.83
14	2018	0.828441	22.9894	39.0432	GRC	0.520854	0.271289	0.251995	0	1	0	0	0	0	-3505884540	79.058	69.3996	0.61385	19757	15.4399	0.162002	Greece	15.2477		12200000	37.2591	5110000	72.2384	3.10629	4.44365	0.7833	0.8764	0.8194	0.8867	0.6439	Greece	35	0.7833	0.8764	0.8194	0.8867	0.6439	4.44365	3.10629	72.2384		5110000	37.2591	3540.65
14	2019	1.0334	22.9894	39.0432	GRC	0.527961	0.278743	0.254071	0	1	0	0	0	0	-4372859649	79.388	69.4744	0.616091	19144.3	16.0437	0.176814	Greece	15.3384		11900000	38.8809	4810000	75.6712	3.11251	4.47632	0.7927	0.83105	0.76265	0.8886	0.72695								4.47632	3.11251	75.6712		4810000	38.8809	3540.73
14	2020	0.986588	22.9894	39.0432	GRC	0.571055	0.326104	0.266844	0	1	0	0	0	0	-2655346656	79.715	68.5063	0.621638	17658.9	17.5079	0.18384	Greece	15.0029		11400000	40.4959	4860000	78.1158	3.51206	5.60472	0.8021	0.7857	0.7059	0.8905	0.81	Greece	42	0.8021	0.7857	0.7059	0.8905	0.81	5.60472	3.51206	78.1158		4860000	40.4959	3577.79
14	2021	1.29746	22.9894	39.0432	GRC	0.553602	0.306476	0.261634	0	1	0	0	0	0	-4904551441	80.038	68.1532	0.615281	20192.6	21.6602	0.20261	Greece	15.281		11500000	42.4599	4910000	78.4943	3.03855	5.30948	0.8115	0.74035	0.64915	0.8924	0.89305								5.30948	3.03855	78.4943		4910000	42.4599	3927.98
15	2006	2.55686	16.4202	45.026	HRV	-0.386625	0.149479	0.0568598	0	0	0	0	0	1	-3077969935	54.483	56.7475	1.36072	11810.1	5.97	0.0771203	Croatia	29.3476		4400000	5.69998	1830000	37.98	2.68654	6.01451	0.55368	0.161853	0.438677	0.89972	0.323947								6.01451	2.68654	37.98		1830000	5.69998	1586.2
15	2007	1.03538	16.4202	45.026	HRV	-0.361624	0.130772	0.0603751	0	0	0	0	0	1	-4266112258	54.651	57.9602	1.396	14069.3	4.237	0.0631009	Croatia	30.6429	77.1529	5030000	8.78555	1850000	41.44	2.83285	5.72238	0.55934	0.149107	0.435053	0.89944	0.346133								5.72238	2.83285	41.44	77.1529	1850000	8.78555	1733.72
15	2008	0.956394	16.4202	45.026	HRV	-0.349353	0.122048	0.062139	0	0	0	0	0	1	-3855003768	54.819	57.9688	1.39674	16461.3	5.225	0.0727194	Croatia	30.8536	81.3469	4550000	12.0171	1880000	44.24	2.68548	5.21938	0.565	0.13636	0.43143	0.89916	0.36832	Croatia	47	0.565	0.13636	0.43143	0.89916	0.36832	5.21938	2.68548	44.24	81.3469	1880000	12.0171	1770.53
15	2009	0.891129	16.4202	45.026	HRV	-0.247484	0.0612482	0.0777633	0	0	0	0	0	1	-1694947242	54.987	58.9303	1.31314	14708.9	6.742	0.0835666	Croatia	29.009	82.1675	4680000	16.37	1860000	50.58	2.60201	5.27113	0.5754	0.29675	0.426825	0.908645	0.39516								5.27113	2.60201	50.58		1860000	16.37	1756.97
15	2010	1.01007	16.4202	45.026	HRV	-0.157092	0.0246779	0.0930928	0	0	0	0	0	1	-1098855797	55.155	60.0072	1.2213	14124.8	9.207	0.104156	Croatia	27.4517	82.9881	4930000	19.1788	1870000	56.55	2.09857	5.51989	0.5858	0.45714	0.42222	0.91813	0.422	Croatia	35	0.5858	0.45714	0.42222	0.91813	0.422	5.51989	2.09857	56.55		1870000	19.1788	1690.17
15	2011	1.16984	16.4202	45.026	HRV	-0.0676385	0.00457497	0.10962	0	0	0	0	0	1	-1309375115	55.322	60.3546	1.20625	14812.9	5.239	0.0760649	Croatia	27.9513	83.8086	5120000	20.5163	1850000	57.79	1.54842	4.2149	0.65932	0.37332	0.53137	0.889825	0.559245								4.2149	1.54842	57.79		1850000	20.5163	1624.9
15	2012	1.07345	16.4202	45.026	HRV	0.0839725	0.00705138	0.140713	0	0	0	0	0	1	-1552272122	55.506	59.9395	1.16444	13443.1	5.214	0.0757952	Croatia	27.9116	84.6292	4970000	21.2213	1740000	61.94	1.89152	4.35066	0.73284	0.2895	0.64052	0.86152	0.69649	Croatia	30	0.73284	0.2895	0.64052	0.86152	0.69649	4.35066	1.89152	61.94	84.6292	1740000	21.2213	1566.1
15	2013	1.06215	16.4202	45.026	HRV	0.0414059	0.00171445	0.131592	0	0	0	0	0	1	-9.94175e+08	55.706	59.4916	1.15134	13871.3	9.189	0.10162	Croatia	27.6251		4720000	22.1572	1670000	66.7476	2.55397	5.36008	0.680505	0.311415	0.55254	0.82716	0.6618								5.36008	2.55397	66.7476		1670000	22.1572	1524.03
15	2014	1.04929	16.4202	45.026	HRV	-0.0753024	0.00567045	0.108151	0	0	0	0	0	1	-9.36806e+08	55.923	59.7075	1.11524	13784.5	9.847	0.107912	Croatia	26.9796		4460000	22.9807	1570000	68.57	2.01221	4.86428	0.62817	0.33333	0.46456	0.7928	0.62711	Croatia	47	0.62817	0.33333	0.46456	0.7928	0.62711	4.86428	2.01221	68.57		1570000	22.9807	1565.67
15	2015	1.05796	16.4202	45.026	HRV	0.120821	0.0145977	0.148856	0	0	0	0	0	1	-2.20433e+08	56.155	59.5104	1.09767	11952.3	7.442	0.0932511	Croatia	26.7122		4420000	23.1788	1480000	69.845	2.44873	5.22557	0.672205	0.556495	0.60547	0.79889	0.61223								5.22557	2.44873	69.845		1480000	23.1788	1585.25
15	2016	1.01665	16.4202	45.026	HRV	0.30918	0.0955925	0.194058	0	0	0	0	0	1	-2203360302	56.403	59.4469	1.10481	12552.3	8.291	0.0962878	Croatia	26.9743		4410000	24.7125	1440000	72.6973	2.70098	5.04596	0.71624	0.77966	0.74638	0.80498	0.59735	Croatia	37	0.71624	0.77966	0.74638	0.80498	0.59735	5.04596	2.70098	72.6973		1440000	24.7125	1589.95
15	2017	0.968128	16.4202	45.026	HRV	0.275288	0.0757836	0.185483	0	0	0	0	0	1	-1284055368	56.667	59.7976	1.07117	13655.8	7.0581	0.089689	Croatia	26.4155		4320000	26.1393	1400000	67.0962	2.51035	5.0201	0.70902	0.77468	0.71349	0.81229	0.601225								5.0201	2.51035	67.0962		1400000	26.1393	1625.05
15	2018	0.995434	16.4202	45.026	HRV	0.270365	0.0730973	0.184253	0	0	0	0	0	1	-1025226668	56.947	59.6376	1.10398	15244.4	9.69789	0.107535	Croatia	27.4224		4390000	27.1024	1360000	75.2946	2.32967	4.80921	0.7018	0.7697	0.6806	0.8196	0.6051	Croatia	55	0.7018	0.7697	0.6806	0.8196	0.6051	4.80921	2.32967	75.2946		1360000	27.1024	1655.05
15	2019	1.04736	16.4202	45.026	HRV	0.37457	0.140303	0.211149	0	0	0	0	0	1	-3849662514	57.242	59.5604	1.11126	15331.9	8.36868	0.0962658	Croatia	27.6662		4400000	27.9623	1330000	79.0798	2.32681	4.89194	0.73815	0.8313	0.71675	0.8305	0.6672								4.89194	2.32681	79.0798		1330000	27.9623	1679.45
15	2020	0.830143	16.4202	45.026	HRV	0.457953	0.209721	0.233989	0	0	0	0	0	1	-7.82075e+08	57.553	59.8429	1.17	14198.8	8.5255	0.0914266	Croatia	28.2374		4380000	25.1649	1300000	78.3209	2.46178	5.22765	0.7745	0.8929	0.7529	0.8414	0.7293	Croatia	51	0.7745	0.8929	0.7529	0.8414	0.7293	5.22765	2.46178	78.3209		1300000	25.1649	1657.35
15	2021	1.17112	16.4202	45.026	HRV	0.533092	0.284187	0.255576	0	0	0	0	0	1	-3280111990	57.878	60.4016	1.15891	17685.3	10.4208	0.102911	Croatia	28.7826		4400000	25.824	1270000	81.254	2.03749	4.68332	0.81085	0.9545	0.78905	0.8523	0.7914								4.68332	2.03749	81.254		1270000	25.824	1678.17
16	2006	2.71845	19.4179	47.1661	HUN	0.701694	0.492374	0.307479	0	0	0	0	0	1	-3.59697e+08	66.895	56.1095	1.49851	11489.6	1.623	0.0361329	Hungary	32.3193	74.24	9970000	11.9239	3360000	47.06	24.0913	18.3937	0.652187	0.322147	0.67491	0.953477	0.32848								18.3937	24.0913	47.06	74.24	3360000	11.9239	3928.38
16	2007	0.996557	19.4179	47.1661	HUN	0.696556	0.485191	0.305827	0	0	0	0	0	1	-2352495093	67.421	55.8283	1.48128	13940.9	2.027	0.0266122	Hungary	32.5148	85.3599	11000000	14.4855	3250000	53.3	22.5194	19.1999	0.650793	0.263343	0.64598	0.956953	0.35005								19.1999	22.5194	53.3	85.3599	3250000	14.4855	3901.97
16	2008	0.994944	19.4179	47.1661	HUN	0.660618	0.436416	0.294392	0	0	0	0	0	1	-1457150599	67.943	56.4602	1.45875	15772.3	2.469	0.0308221	Hungary	32.2235	93.5078	12200000	17.6642	3090000	61	22.6616	17.4671	0.6494	0.20454	0.61705	0.96043	0.37162	Hungary	30	0.6494	0.20454	0.61705	0.96043	0.37162	17.4671	22.6616	61	93.5078	3090000	17.6642	3848.31
16	2009	0.935642	19.4179	47.1661	HUN	0.811269	0.658157	0.343782	0	0	0	0	0	1	-9.72286e+08	68.46	56.8749	1.41037	13077.3	3.01	0.0437768	Hungary	31.1569	93.02	11800000	19.7503	3070000	62	25.9953	20.4755	0.640435	0.25941	0.560905	0.960065	0.40271								20.4755	25.9953	62		3070000	19.7503	3747.75
16	2010	1.03447	19.4179	47.1661	HUN	0.829056	0.687334	0.349866	0	0	0	0	0	1	-3936697507	68.911	56.6584	1.36599	13217.5	3.15685	0.0397919	Hungary	30.704	92.5322	12000000	21.6227	2980000	65	25.5855	21.2001	0.63147	0.31428	0.50476	0.9597	0.4338	Hungary	27	0.63147	0.31428	0.50476	0.9597	0.4338	21.2001	25.5855	65		2980000	21.6227	3732.39
16	2011	1.11722	19.4179	47.1661	HUN	0.779751	0.608011	0.333133	0	0	0	0	0	1	-1961626798	69.358	55.9977	1.33087	14234.5	2.82144	0.0415082	Hungary	30.8389	92.0443	11700000	23.2396	2930000	68.02	21.5783	17.4781	0.675805	0.38084	0.595515	0.9331	0.50073								17.4781	21.5783	68.02		2930000	23.2396	3759.02
16	2012	1.07148	19.4179	47.1661	HUN	0.793702	0.629962	0.337826	0	0	0	0	0	1	-2877531842	69.678	55.2709	1.24288	12984.8	2.73191	0.044402	Hungary	29.7919	91.5565	11600000	24.1484	2960000	70.58	17.4499	16.2655	0.72014	0.4474	0.68627	0.9065	0.56766	Hungary	31	0.72014	0.4474	0.68627	0.9065	0.56766	16.2655	17.4499	70.58	91.5565	2960000	24.1484	3827.22
16	2013	1.06759	19.4179	47.1661	HUN	0.66088	0.436763	0.294475	0	0	0	0	0	1	-2.78232e+08	69.953	55.4837	1.24595	13715.1	2.85862	0.0536849	Hungary	29.8951		11600000	26.2481	2980000	72.6439	14.7658	15.0024	0.69194	0.44919	0.62266	0.88665	0.56651								15.0024	14.7658	72.6439		2980000	26.2481	3892.76
16	2014	1.02502	19.4179	47.1661	HUN	0.478173	0.228649	0.239704	0	0	0	0	0	1	-3819551081	70.227	54.8696	1.26089	14294.3	3.237	0.0640519	Hungary	30.5031		11700000	26.1508	3010000	75.6532	11.9188	12.3838	0.66374	0.45098	0.55905	0.8668	0.56536	Hungary	39	0.66374	0.45098	0.55905	0.8668	0.56536	12.3838	11.9188	75.6532		3010000	26.1508	4100.84
16	2015	0.926145	19.4179	47.1661	HUN	0.502486	0.252492	0.246668	0	0	0	0	0	1	-2890619219	70.5	54.0817	1.2463	12717	3.33903	0.0699934	Hungary	30.3291		9900000	27.6181	3090000	72.8347	11.6238	12.5805	0.669145	0.471255	0.59474	0.84925	0.56343								12.5805	11.6238	72.8347		3090000	27.6181	4375.36
16	2016	0.948243	19.4179	47.1661	HUN	0.542999	0.294848	0.258493	0	0	0	0	0	1	-2983727247	70.779	55.4481	1.24668	13104.7	3.44201	0.0633605	Hungary	30.4381		9950000	28.6754	3120000	79.2594	11.3843	12.5185	0.67455	0.49153	0.63043	0.8317	0.5615	Hungary	46	0.67455	0.49153	0.63043	0.8317	0.5615	12.5185	11.3843	79.2594		3120000	28.6754	4482.21
16	2017	1.07086	19.4179	47.1661	HUN	0.629715	0.396541	0.284734	0	0	0	0	0	1	-2376170201	71.062	55.8863	1.27829	14621.2	3.654	0.0709315	Hungary	31.5233		9950000	30.2033	3130000	76.7505	11.1838	12.5637	0.700525	0.599715	0.683265	0.83405	0.5843								12.5637	11.1838	76.7505		3130000	30.2033	4548.37
16	2018	1.04085	19.4179	47.1661	HUN	0.723489	0.523437	0.314539	0	0	0	0	0	1	-3531634246	71.351	55.884	1.30532	16425.1	3.959	0.0797211	Hungary	32.4235		10000000	31.5	3080000	76.0744	11.3424	12.4824	0.7265	0.7079	0.7361	0.8364	0.6071	Hungary	45	0.7265	0.7079	0.7361	0.8364	0.6071	12.4824	11.3424	76.0744		3080000	31.5	4606.38
16	2019	0.920898	19.4179	47.1661	HUN	0.842266	0.709411	0.354419	0	0	0	0	0	1	-4.97078e+08	71.644	56.41	1.2889	16783	4.897	0.0793466	Hungary	32.0888		10300000	32.6418	3050000	80.3717	12.8195	13.7527	0.7505	0.69325	0.7416	0.84365	0.6663								13.7527	12.8195	80.3717		3050000	32.6418	4644.57
16	2020	0.872046	19.4179	47.1661	HUN	0.908523	0.825414	0.3777	0	0	0	0	0	1	-3000797705	71.942	56.6144	1.32185	16121	5.724	0.083637	Hungary	31.9022		10300000	33.4884	2970000	84.7712	13.092	14.0342	0.7745	0.6786	0.7471	0.8509	0.7255	Hungary	52	0.7745	0.6786	0.7471	0.8509	0.7255	14.0342	13.092	84.7712		2970000	33.4884	4603.23
16	2021	1.05546	19.4179	47.1661	HUN	0.918792	0.844179	0.381374	0	0	0	0	0	1	-3333956161	72.245	57.012	1.26618	18728.1	6.98812	0.0920854	Hungary	31.4466		10400000	34.8322	2960000	88.6408	12.2871	13.0255	0.7985	0.66395	0.7526	0.85815	0.7847								13.0255	12.2871	88.6408		2960000	34.8322	4634.55
17	2006	2.42352	117.278	-2.22636	IDN	-0.779785	0.608065	0.0154447	1	0	0	0	0	0	-2188448467	46.738	40.0826	0.861995	1572.8	16.217	0.162108	Indonesia	18.5912		63800000	0.0838521	14800000	4.76481	6.08931	3.49921	0.391473	0.205623	0.308913	0.809973	0.0563433								3.49921	6.08931	4.76481		14800000	0.0838521	95456.9
17	2007	0.990237	117.278	-2.22636	IDN	-0.74925	0.561375	0.0177275	1	0	0	0	0	0	-2253330000	47.535	39.4842	0.85719	1840.33	18.23	0.181659	Indonesia	18.8158		93400000	0.331591	19500000	5.78627	5.28082	4.95203	0.401087	0.125537	0.321677	0.819947	0.0632467								4.95203	5.28082	5.78627		19500000	0.331591	99930.2
17	2008	1.00993	117.278	-2.22636	IDN	-0.630566	0.397613	0.0280935	1	0	0	0	0	0	-3418723399	48.335	37.4575	0.83485	2144.39	19.7694	0.196311	Indonesia	18.4416		141000000	0.412531	30400000	7.91748	4.75628	9.06136	0.4107	0.04545	0.33444	0.82992	0.07015	Indonesia	106	0.4107	0.04545	0.33444	0.82992	0.07015	9.06136	4.75628	7.91748		30400000	0.412531	102301
17	2009	0.975647	117.278	-2.22636	IDN	-0.613124	0.375921	0.0298171	1	0	0	0	0	0	-2628247483	49.134	37.0577	0.828182	2239.1	20.6321	0.203044	Indonesia	18.2956	27.0007	164000000	0.77343	34800000	6.92	5.94017	8.90152	0.40667	0.08701	0.28944	0.84196	0.09222								8.90152	5.94017	6.92	27.0007	34800000	0.77343	104678
17	2010	0.971577	117.278	-2.22636	IDN	-0.628791	0.395378	0.0282665	1	0	0	0	0	0	-11106333135	49.914	40.666	0.829915	3094.44	26.738	0.262793	Indonesia	18.6544	34.5063	211000000	0.934494	40900000	10.92	4.98318	8.49366	0.40264	0.12857	0.24444	0.854	0.11429	Indonesia	109	0.40264	0.12857	0.24444	0.854	0.11429	8.49366	4.98318	10.92	34.5063	40900000	0.934494	107807
17	2011	1.05473	117.278	-2.22636	IDN	-0.553847	0.306746	0.0360585	1	0	0	0	0	0	-11528394762	50.595	40.5846	0.862701	3613.8	22.012	0.215783	Indonesia	19.9905	39.861	250000000	1.1074	38600000	12.28	3.85504	7.40555	0.44875	0.169535	0.370585	0.826095	0.151975								7.40555	3.85504	12.28		38600000	1.1074	109724
17	2012	0.989468	117.278	-2.22636	IDN	-0.429244	0.18425	0.0511105	1	0	0	0	0	0	-13716225988	51.276	40.8734	0.879019	3668.21	31.163	0.299251	Indonesia	21.0701	45.2158	282000000	1.19214	38000000	14.52	4.05894	7.07661	0.49486	0.2105	0.49673	0.79819	0.18966	Indonesia	97	0.49486	0.2105	0.49673	0.79819	0.18966	7.07661	4.05894	14.52		38000000	1.19214	113537
17	2013	0.990913	117.278	-2.22636	IDN	-0.477364	0.227877	0.0449871	1	0	0	0	0	0	-12170055179	51.955	41.5165	0.87331	3602.89	35.561	0.343072	Indonesia	20.9541	50.5705	313000000	1.2839	30700000	14.94	3.61527	7.0931	0.4718	0.252305	0.429465	0.738395	0.24755								7.0931	3.61527	14.94		30700000	1.2839	114345
17	2014	0.993731	117.278	-2.22636	IDN	-0.518054	0.26838	0.0401142	1	0	0	0	0	0	-14733198283	52.635	42.2422	0.884428	3476.62	34.473	0.333751	Indonesia	21.3959	55.9253	326000000	1.32693	26200000	17.14	3.47401	6.99693	0.44874	0.29411	0.3622	0.6786	0.30544	Indonesia	106	0.44874	0.29411	0.3622	0.6786	0.30544	6.99693	3.47401	17.14		26200000	1.32693	116399
17	2015	1.01898	117.278	-2.22636	IDN	-0.48438	0.234624	0.044127	1	0	0	0	0	0	-10704478317	53.313	43.3091	0.905614	3322.58	33.642	0.319735	Indonesia	22.0385	61.28	339000000	1.53729	10400000	22.0627	3.52102	7.63179	0.44829	0.333495	0.36226	0.6791	0.30351								7.63179	3.52102	22.0627		10400000	1.53729	117833
17	2016	1.01894	117.278	-2.22636	IDN	-0.4512	0.203581	0.0482681	1	0	0	0	0	0	-16135916019	53.989	43.6418	0.88976	3558.82	39.659	0.383889	Indonesia	21.7238	66.6348	386000000	1.99633	10800000	25.4474	3.3692	7.96688	0.44784	0.37288	0.36232	0.6796	0.30158	Indonesia	116	0.44784	0.37288	0.36232	0.6796	0.30158	7.96688	3.3692	25.4474		10800000	1.99633	119530
17	2017	1.00913	117.278	-2.22636	IDN	-0.307376	0.09448	0.0683653	1	0	0	0	0	0	-18502038861	54.659	43.6141	0.892831	3839.79	43.262	0.412905	Indonesia	22.0177	71.9895	435000000	2.35008	11100000	32.3358	2.98515	7.97212	0.48682	0.49544	0.46586	0.68265	0.31189								7.97212	2.98515	32.3358	71.9895	11100000	2.35008	122781
17	2018	0.985199	117.278	-2.22636	IDN	-0.178617	0.0319041	0.0893173	1	0	0	0	0	0	-12510610514	55.325	43.4048	0.89667	3902.66	48.376	0.459063	Indonesia	22.2728	73.7731	319000000	3.32281	8300000	39.9046	2.88195	7.70309	0.5258	0.618	0.5694	0.6857	0.3222	Indonesia	107	0.5258	0.618	0.5694	0.6857	0.3222	7.70309	2.88195	39.9046	73.7731	8300000	3.32281	126675
17	2019	0.991851	117.278	-2.22636	IDN	0.00590978	3.49255e-05	0.124219	1	0	0	0	0	0	-20531070566	55.985	44.2207	0.895628	4151.23	48.04	0.444879	Indonesia	22.2978	75.5658	341000000	3.81492	9660000	47.6906	3.00691	8.06078	0.5935	0.684	0.6259	0.70995	0.44455								8.06078	3.00691	47.6906	75.5658	9660000	3.81492	131896
17	2020	0.976546	117.278	-2.22636	IDN	0.216422	0.0468384	0.17105	1	0	0	0	0	0	-14142473958	56.641	44.3959	0.892308	3894.27	52.916	0.488621	Indonesia	21.5354	78.5619	356000000	4.31189	9660000	53.7265	3.33146	9.4273	0.6612	0.75	0.6824	0.7342	0.5669	Indonesia	88	0.6612	0.75	0.6824	0.7342	0.5669	9.4273	3.33146	53.7265	78.5619	9660000	4.31189	131187
17	2021	0.999532	117.278	-2.22636	IDN	0.351965	0.123879	0.205159	1	0	0	0	0	0	-17105962221	57.29	42.8177	0.876213	4332.71	56.191	0.517622	Indonesia	21.7614	81.2847	366000000	4.53672	9020000	62.1	2.91655	8.49755	0.7289	0.816	0.7389	0.75845	0.68925								8.49755	2.91655	62.1	81.2847	9020000	4.53672	130518
18	2006	2.47931	79.2897	22.7456	IND	-0.669551	0.448299	0.0244264	0	0	1	0	0	0	-5992285935	29.569	44.0432	0.898162	802.014	130.899	1.42865	India	19.3712		166000000	0.196183	40800000	2.8055	1.10866	7.64959	0.393887	0.189153	0.54788	0.599833	0.0329667								7.64959	1.10866	2.8055		40800000	0.196183	332160
18	2007	0.96361	79.2897	22.7456	IND	-0.679903	0.462268	0.0234958	0	0	1	0	0	0	-8201628958	29.906	44.0082	0.910968	1022.73	127.333	1.40612	India	19.9962		234000000	0.263093	39300000	3.95	1.0742	7.37869	0.387643	0.219577	0.51307	0.609667	0.0382333								7.37869	1.0742	3.95		39300000	0.263093	342956
18	2008	0.924964	79.2897	22.7456	IND	-0.773222	0.597872	0.0159221	0	0	1	0	0	0	-24149749830	30.246	45.8825	0.929511	993.504	139.149	1.45499	India	20.5327		347000000	0.437544	37900000	4.38	0.9733	4.0883	0.3814	0.25	0.47826	0.6195	0.0435	India	113	0.3814	0.25	0.47826	0.6195	0.0435	4.0883	0.9733	4.38		37900000	0.437544	353752
18	2009	0.98913	79.2897	22.7456	IND	-0.643482	0.414069	0.0268501	0	0	1	0	0	0	-19485789183	30.587	45.9849	0.955893	1096.63	142.824	1.46686	India	21.1169		525000000	0.633006	37100000	5.12	3.45018	7.7886	0.369065	0.225	0.423255	0.63138	0.05091								7.7886	3.45018	5.12		37100000	0.633006	364548
18	2010	1.02771	79.2897	22.7456	IND	-0.727221	0.52885	0.0194719	0	0	1	0	0	0	-11428785746	30.93	45.0337	0.970267	1350.63	148.118	1.49678	India	21.8091		752000000	0.885852	35100000	7.5	1.99804	6.30845	0.35673	0.2	0.36825	0.64326	0.05832	India	119	0.35673	0.2	0.36825	0.64326	0.05832	6.30845	1.99804	7.5		35100000	0.885852	375344
18	2011	0.98672	79.2897	22.7456	IND	-0.669628	0.448401	0.0244194	0	0	1	0	0	0	-23890659988	31.276	45.4421	0.997368	1449.6	174.541	1.7652	India	23.111		894000000	1.06162	32800000	10.07	2.18267	5.97356	0.3698	0.1921	0.452095	0.572875	0.084245								5.97356	2.18267	10.07		32800000	1.06162	384949
18	2012	0.972589	79.2897	22.7456	IND	-0.649054	0.421271	0.0263225	0	0	1	0	0	0	-15442447343	31.634	46.3011	1.01606	1434.02	167.043	1.683	India	24.3551		865000000	1.17555	30900000	11.1	1.98005	5.31103	0.38287	0.1842	0.53594	0.50249	0.11017	India	125	0.38287	0.1842	0.53594	0.50249	0.11017	5.31103	1.98005	11.1		30900000	1.17555	394554
18	2013	1.01427	79.2897	22.7456	IND	-0.572597	0.327868	0.0340201	0	0	1	0	0	0	-26388082470	32.003	46.6987	1.01831	1438.06	195.605	1.95518	India	24.4332		886000000	1.15617	29000000	12.3	1.59177	5.77512	0.38315	0.405825	0.53962	0.486145	0.1237								5.77512	1.59177	12.3		29000000	1.15617	386692
18	2014	1.02932	79.2897	22.7456	IND	-0.494806	0.244833	0.0428641	0	0	1	0	0	0	-22890162761	32.384	47.8224	1.01389	1559.86	199.266	1.99595	India	24.5279		944000000	1.20482	27000000	13.5	0.97367	6.3118	0.38343	0.62745	0.5433	0.4698	0.13723	India	118	0.38343	0.62745	0.5433	0.4698	0.13723	6.3118	0.97367	13.5		27000000	1.20482	378829
18	2015	1.06836	79.2897	22.7456	IND	-0.313923	0.0985474	0.0673747	0	0	1	0	0	0	-36495216491	32.777	47.7837	1.01021	1590.17	190.436	1.85581	India	24.5839		1000000000	1.28076	25500000	14.9	0.88909	8.56399	0.42359	0.69508	0.64484	0.485845	0.140105								8.56399	0.88909	14.9		25500000	1.28076	370967
18	2016	1.05174	79.2897	22.7456	IND	-0.163732	0.0268082	0.0919197	0	0	1	0	0	0	-39411278940	33.182	47.7494	1.01218	1714.28	212.932	2.07794	India	24.7128		1130000000	1.39346	24400000	16.5	0.95256	9.33334	0.46375	0.76271	0.74638	0.50189	0.14298	India	107	0.46375	0.76271	0.74638	0.50189	0.14298	9.33334	0.95256	16.5		24400000	1.39346	363104
18	2017	1.01793	79.2897	22.7456	IND	-0.00909182	8.26612e-05	0.121168	0	0	1	0	0	0	-28875941053	33.6	47.6709	1.00753	1957.97	237.73	2.29271	India	24.8462		1170000000	1.31857	23200000	18.2	0.86412	9.71654	0.515325	0.858905	0.84889	0.525145	0.17194								9.71654	0.86412	18.2		23200000	1.31857	355242
18	2018	1.00208	79.2897	22.7456	IND	0.12566	0.0157906	0.149943	0	0	1	0	0	0	-30699661201	34.03	48.4316	1.00441	1974.38	267.071	2.56099	India	24.9491		1180000000	1.32724	21900000	20.0813	1.18222	9.1794	0.5669	0.9551	0.9514	0.5484	0.2009	India	96	0.5669	0.9551	0.9514	0.5484	0.2009	9.1794	1.18222	20.0813		21900000	1.32724	347379
18	2019	0.981099	79.2897	22.7456	IND	0.168958	0.0285469	0.159839	0	0	1	0	0	0	-37469945322	34.472	50.1077	1.019	2047.23	302.334	2.77013	India	25.3692		1150000000	1.38503	21000000	29.5235	2.00399	9.45635	0.58165	0.9061	0.90215	0.5666	0.2762								9.45635	2.00399	29.5235		21000000	1.38503	379952
18	2020	0.931528	79.2897	22.7456	IND	0.243068	0.0590819	0.177511	0	0	1	0	0	0	-53239697391	34.926	48.4369	0.991615	1910.42	309.805	2.78723	India	23.9321		1150000000	1.64353	20100000	43.4054	2.05474	10.8139	0.5964	0.8571	0.8529	0.5848	0.3515	India	100	0.5964	0.8571	0.8529	0.5848	0.3515	10.8139	2.05474	43.4054		20100000	1.64353	386825
18	2021	1.0791	79.2897	22.7456	IND	0.216076	0.0466888	0.170967	0	0	1	0	0	0	-27488543123	35.393	47.5104	1.0203	2256.59	340.58	3.01277	India	25.34		1150000000	1.95799	23800000	46.31	2.227	9.38645	0.61115	0.8081	0.80365	0.603	0.4268								9.38645	2.227	46.31		23800000	1.95799	393697
19	2006	2.18542	35.0223	31.4822	ISR	0.225681	0.050932	0.173281	0	1	0	0	0	0	1042400000	91.58	66.5936	0.98442	22494.6	0.025	-0.00604375	Israel	21.2316		8400000	20.7989	3000000	27.8811	7.53811	9.56983	0.706653	0.3177	0.709023	0.942017	0.469667								9.56983	7.53811	27.8811		3000000	20.7989	2573.57
19	2007	1.01995	35.0223	31.4822	ISR	0.183113	0.0335302	0.163142	0	1	0	0	0	0	-193600000	91.641	66.1868	0.976675	25633.6	0.024	-0.00686316	Israel	21.4385		8900000	21.9865	3070000	48.1281	2.71706	8.47665	0.722977	0.31794	0.687287	0.944033	0.539103								8.47665	2.71706	48.1281		3070000	21.9865	2681.97
19	2008	0.964303	35.0223	31.4822	ISR	0.374375	0.140157	0.211097	0	1	0	0	0	0	-3065000000	91.702	66.6663	0.956993	30173.4	0.032	-0.0121931	Israel	21.1398		8980000	23.8037	3220000	59.39	10.27	7.84521	0.7393	0.31818	0.66555	0.94605	0.60854	Israel	17	0.7393	0.31818	0.66555	0.94605	0.60854	7.84521	10.27	59.39		3220000	23.8037	2776.69
19	2009	0.904495	35.0223	31.4822	ISR	0.489854	0.239957	0.243038	0	1	0	0	0	0	-2855800000	91.763	67.2635	0.899378	28317	0.099	-0.0119414	Israel	19.8684		9020000	23.9315	3320000	63.12	16.3841	9.7234	0.697235	0.36623	0.624835	0.948105	0.520955								9.7234	16.3841	63.12		3320000	23.9315	2785.9
19	2010	1.09366	35.0223	31.4822	ISR	0.340561	0.115982	0.20217	0	1	0	0	0	0	958700000	91.826	66.8451	0.875668	31266.6	0.17	-0.0118735	Israel	19.6828	91.2506	9110000	24.0433	3410000	67.5	12.2885	9.20145	0.65517	0.41428	0.58412	0.95016	0.43337	Israel	26	0.65517	0.41428	0.58412	0.95016	0.43337	9.20145	12.2885	67.5	91.2506	3410000	24.0433	2938.24
19	2011	1.1163	35.0223	31.4822	ISR	0.539934	0.291529	0.257589	0	1	0	0	0	0	-1252100000	91.892	67.6149	0.83479	34354.7	0.301	-0.0114809	Israel	19.3437		9200000	25.1889	3500000	68.8739	10.6898	8.72505	0.73259	0.65449	0.716895	0.92231	0.55964								8.72505	10.6898	68.8739		3500000	25.1889	3024.68
19	2012	0.83253	35.0223	31.4822	ISR	0.804487	0.6472	0.341477	0	1	0	0	0	0	-6741700000	91.96	67.9728	0.729698	33156.2	0.492	-0.0104469	Israel	17.4909		9230000	25.5133	3590000	70.8	11.7007	8.85602	0.81001	0.8947	0.84967	0.89446	0.68591	Israel	16	0.81001	0.8947	0.84967	0.89446	0.68591	8.85602	11.7007	70.8		3590000	25.5133	3352.88
19	2013	1.04761	35.0223	31.4822	ISR	0.809621	0.655486	0.343221	0	1	0	0	0	0	-7984000000	92.031	67.6882	0.73914	36941.8	0.57	-0.0105127	Israel	17.7348		9500000	25.9232	3400000	70.2503	11.8446	8.75702	0.81308	0.87872	0.86184	0.87448	0.702945								8.75702	11.8446	70.2503		3400000	25.9232	3439.32
19	2014	0.99967	35.0223	31.4822	ISR	0.826788	0.683579	0.349088	0	1	0	0	0	0	-1523400000	92.104	68.1996	0.730904	38259.7	0.965	-0.00735058	Israel	17.6819		9500000	27.0987	3430000	75.0178	11.1899	8.99978	0.81615	0.86274	0.87401	0.8545	0.71998	Israel	17	0.81615	0.86274	0.87401	0.8545	0.71998	8.99978	11.1899	75.0178		3430000	27.0987	3545.66
19	2015	0.991896	35.0223	31.4822	ISR	0.927002	0.859333	0.384325	0	1	0	0	0	0	-367800000	92.179	68.4517	0.722188	36206.5	1.222	-0.00634435	Israel	17.5747		10600000	27.1361	3410000	77.3521	14.3299	11.4613	0.798355	0.846625	0.868165	0.858195	0.66873								11.4613	14.3299	77.3521		3410000	27.1361	3634.23
19	2016	1.11491	35.0223	31.4822	ISR	0.832276	0.692684	0.350974	0	1	0	0	0	0	2590400000	92.256	69.3105	0.716691	37690.5	1.7124	-0.00313796	Israel	17.4983		10600000	27.6749	3340000	79.6531	11.7346	10.8765	0.78056	0.83051	0.86232	0.86189	0.61748	Israel	20	0.78056	0.83051	0.86232	0.86189	0.61748	10.8765	11.7346	79.6531		3340000	27.6749	3727.22
19	2017	0.998971	35.0223	31.4822	ISR	0.778979	0.606808	0.332874	0	1	0	0	0	0	-9268600000	92.336	70.5552	0.704782	41114.8	1.8664	-0.00207924	Israel	17.3803		10500000	28.1854	3240000	81.5812	10.7697	8.9439	0.79018	0.831005	0.84436	0.862695	0.66349								8.9439	10.7697	81.5812		3240000	28.1854	3813.85
19	2018	1.33061	35.0223	31.4822	ISR	0.814403	0.663253	0.344851	0	1	0	0	0	0	-15427900000	92.418	70.4837	0.694443	42406.8	1.9092	-0.0026232	Israel	17.2496		10700000	28.7945	3200000	83.7332	11.6004	8.88514	0.7998	0.8315	0.8264	0.8635	0.7095	Israel	31	0.7998	0.8315	0.8264	0.8635	0.7095	8.88514	11.6004	83.7332		3200000	28.7945	973.615
19	2019	1.07286	35.0223	31.4822	ISR	0.791497	0.626467	0.337082	0	1	0	0	0	0	-8673400000	92.501	70.9196	0.685118	44452.2	2.9192	0.00446234	Israel	17.0569		11700000	28.8217	3140000	86.7879	9.98852	8.77816	0.81795	0.7729	0.78675	0.87795	0.7892								8.77816	9.98852	86.7879		3140000	28.8217	989.019
19	2020	1.01343	35.0223	31.4822	ISR	0.940381	0.884316	0.389157	0	1	0	0	0	0	-18684600000	92.587	71.8158	0.708319	44846.8	3.905	0.0129574	Israel	17.0949		12300000	29.7126	3370000	90.1273	14.2784	10.5037	0.8361	0.7143	0.7471	0.8924	0.8689	Israel	30	0.8361	0.7143	0.7471	0.8924	0.8689	10.5037	14.2784	90.1273		3370000	29.7126	979.141
19	2021	1.10115	35.0223	31.4822	ISR	0.933479	0.871382	0.38666	0	1	0	0	0	0	-12030800000	92.674	72.4485	0.684095	52170.7	5.005	0.0216524	Israel	16.99		12500000	29.851	3500000	90.3	14.0152	10.2777	0.85425	0.6557	0.70745	0.90685	0.9486								10.2777	14.0152	90.3		3500000	29.851	988.066
20	2006	2.77567	36.7883	31.2496	JOR	-0.51864	0.268988	0.040046	0	1	0	0	0	0	-3682087447	80.97	63.7999	1.16893	2478.29	0.059	0.00217209	Jordan	25.2111		4340000	0.80029	614000	13.8671	3.78629	6.40987	0.491947	0.213557	0.491523	0.862567	0.121203								6.40987	3.78629	13.8671		614000	0.80029	1788.54
20	2007	1.07689	36.7883	31.2496	JOR	-0.288293	0.0831126	0.0712941	0	1	0	0	0	0	-2574048817	82.371	63.14	1.13937	2643.17	0.072	0.000863159	Jordan	25.0099		4770000	1.37203	559000	20	6.87691	7.89655	0.519973	0.379503	0.548437	0.865133	0.145267								7.89655	6.87691	20		559000	1.37203	1818.64
20	2008	1.10304	36.7883	31.2496	JOR	-0.268219	0.0719412	0.0744412	0	1	0	0	0	0	-2813926352	83.692	58.7906	1.11749	3415.97	0.073	0.00151543	Jordan	24.6851		5310000	2.19872	518990	23	3.76939	6.44178	0.548	0.54545	0.60535	0.8677	0.16933	Jordan	50	0.548	0.54545	0.60535	0.8677	0.16933	6.44178	3.76939	23		518990	2.19872	1848.74
20	2009	0.918185	36.7883	31.2496	JOR	-0.410808	0.168763	0.05356	0	1	0	0	0	0	-2340704225	84.928	59.7287	1.09678	3618.89	0.068	0.00153837	Jordan	24.2294		6010000	3.51001	501238	26	1.55802	4.63834	0.53792	0.41558	0.56934	0.86855	0.17498								4.63834	1.55802	26		501238	3.51001	1878.84
20	2010	0.893648	36.7883	31.2496	JOR	-0.483233	0.233514	0.0442671	0	1	0	0	0	0	-1659943662	86.088	59.1153	1.04973	3914.7	0.072	0.00287388	Jordan	23.5953		6620000	4.23121	485529	27.2	1.29396	4.25929	0.52784	0.28571	0.53333	0.8694	0.18063	Jordan	51	0.52784	0.28571	0.53333	0.8694	0.18063	4.25929	1.29396	27.2		485529	4.23121	1908.94
20	2011	0.95957	36.7883	31.2496	JOR	-0.539114	0.290644	0.0377017	0	1	0	0	0	0	-1455211268	87.172	58.9053	0.995385	4152.49	0.065	0.00626949	Jordan	23.065		7480000	4.17177	465388	34.9	1.47155	4.09132	0.50811	0.195505	0.46274	0.835365	0.22614								4.09132	1.47155	34.9		465388	4.17177	1939.05
20	2012	1.00519	36.7883	31.2496	JOR	-0.618351	0.382358	0.0292952	0	1	0	0	0	0	-1543039437	88.185	60.2741	0.937332	4386.46	0.069	0.00300626	Jordan	22.4679		8980000	4.16389	434437	37	1.61203	3.63049	0.48838	0.1053	0.39215	0.80133	0.27165	Jordan	98	0.48838	0.1053	0.39215	0.80133	0.27165	3.63049	1.61203	37		434437	4.16389	1969.15
20	2013	1.14119	36.7883	31.2496	JOR	-0.520499	0.270919	0.0398302	0	1	0	0	0	0	-1930929598	89.125	60.4144	0.915286	4477.62	0.061	0.00171802	Jordan	21.9613		10300000	4.26758	378411	41.4	1.38522	3.45186	0.50256	0.28794	0.455915	0.760765	0.291								3.45186	1.38522	41.4		378411	4.26758	1999.25
20	2014	1.10746	36.7883	31.2496	JOR	-0.411805	0.169584	0.053426	0	1	0	0	0	0	-2095070423	90	60.0883	0.888254	4255.89	0.063	0.00190793	Jordan	21.4885		11100000	4.06309	375483	46.2	1.88749	3.17178	0.51674	0.47058	0.51968	0.7202	0.31035	Jordan	79	0.51674	0.47058	0.51968	0.7202	0.31035	3.17178	1.88749	46.2		375483	4.06309	2029.35
20	2015	0.984868	36.7883	31.2496	JOR	-0.375871	0.141279	0.058359	0	1	0	0	0	0	-1599295775	90.256	60.1408	0.862775	4064.25	0.23	0.00406452	Jordan	20.996		13800000	3.26225	368938	54.22	1.77728	4.39951	0.5145	0.464105	0.4881	0.72731	0.328095								4.39951	1.77728	54.22		368938	3.26225	2059.45
20	2016	0.97614	36.7883	31.2496	JOR	-0.348064	0.121149	0.0623258	0	1	0	0	0	0	-1549718310	90.506	60.6939	0.840394	4003.4	0.865	0.00900784	Jordan	20.5186		9820000	2.98379	404112	56.15	3.17713	4.78534	0.51226	0.45763	0.45652	0.73442	0.34584	Jordan	91	0.51226	0.45763	0.45652	0.73442	0.34584	4.78534	3.17713	56.15		404112	2.98379	2089.55
20	2017	1.01725	36.7883	31.2496	JOR	-0.283636	0.0804495	0.072018	0	1	0	0	0	0	-2023098592	90.747	60.3679	0.817065	4073.12	1.399	0.0129198	Jordan	20.1492		9700000	3.24927	357203	64.5	3.39429	4.45245	0.53488	0.470365	0.47481	0.73656	0.39322								4.45245	3.39429	64.5		357203	3.24927	2119.65
20	2018	1.03674	36.7883	31.2496	JOR	-0.251859	0.063433	0.0770562	0	1	0	0	0	0	-9.62535e+08	90.979	60.4766	0.79132	4146.41	2.1587	0.0199928	Jordan	19.656		8730000	3.82028	369145	65.2	1.99411	4.74363	0.5575	0.4831	0.4931	0.7387	0.4406	Jordan	98	0.5575	0.4831	0.4931	0.7387	0.4406	4.74363	1.99411	65.2		369145	3.82028	2149.75
20	2019	1.0244	36.7883	31.2496	JOR	-0.28681	0.0822597	0.0715242	0	1	0	0	0	0	-6.86338e+08	91.203	60.7247	0.740609	4205.56	2.9564	0.0268292	Jordan	18.4384		7780000	4.27619	355537	70.0847	2.13527	4.95571	0.5442	0.4082	0.42595	0.70935	0.4973								4.95571	2.13527	70.0847		355537	4.27619	2295.06
20	2020	1.15076	36.7883	31.2496	JOR	-0.345182	0.11915	0.0627445	0	1	0	0	0	0	-733943662	91.418	61.4185	0.728185	4042.77	4.2663	0.0380918	Jordan	17.5744		6990000	5.76961	391486	75.4477	0.99541	4.98811	0.5309	0.3333	0.3588	0.68	0.554	Jordan	117	0.5309	0.3333	0.3588	0.68	0.554	4.98811	0.99541	75.4477		391486	5.76961	2374.53
20	2021	1.1149	36.7883	31.2496	JOR	-0.396722	0.157388	0.0554701	0	1	0	0	0	0	-605915493	91.626	61.0521	0.710083	4103.26	5.08516	0.0450834	Jordan	17.6355		7280000	6.44965	427517	82.7556	1.20886	4.28475	0.5176	0.2584	0.29165	0.65065	0.6107								4.28475	1.20886	82.7556		427517	6.44965	2341.57
21	2006	2.98039	67.2637	48.1703	KAZ	-0.760333	0.578107	0.0168807	0	0	0	1	0	0	-6689399480	56.536	51.625	0.855043	5291.58	7.691	0.0975373	Kazakhstan	18.4413		7780000	0.19276	2930000	3.26837	0.02706	3.56671	0.478933	0.16786	0.407023	0.945293	0.0860533								3.56671	0.02706	3.26837		2930000	0.19276	7403.65
21	2007	0.888217	67.2637	48.1703	KAZ	-0.762553	0.581488	0.0167136	0	0	0	1	0	0	-8030520279	56.609	54.2303	0.861987	6771.41	8.09	0.100293	Kazakhstan	18.9211		12300000	1.68916	3240000	4.02	0.03498	4.03658	0.476617	0.12938	0.364047	0.960587	0.108337								4.03658	0.03498	4.02		3240000	1.68916	7631.75
21	2008	0.877798	67.2637	48.1703	KAZ	-0.826236	0.682666	0.0122738	0	0	0	1	0	0	-13114745080	56.682	52.1049	0.856668	8458.02	7.386	0.0954229	Kazakhstan	18.9236		14900000	2.08255	3460000	11	0.02699	1.95045	0.4743	0.0909	0.32107	0.97588	0.13062	Kazakhstan	81	0.4743	0.0909	0.32107	0.97588	0.13062	1.95045	0.02699	11		3460000	2.08255	7854.7
21	2009	1.01239	67.2637	48.1703	KAZ	-0.608478	0.370246	0.0302848	0	0	0	1	0	0	-10083300957	56.755	53.9952	0.843717	7165.22	6.811	0.092943	Kazakhstan	18.6388		17100000	3.51988	3860000	18.2	0.06162	2.91815	0.51606	0.32402	0.424025	0.971805	0.155155								2.91815	0.06162	18.2		3860000	3.51988	7904.9
21	2010	1.05289	67.2637	48.1703	KAZ	-0.343743	0.118159	0.0629539	0	0	0	1	0	0	-3665239041	56.827	51.68	0.832637	9070.49	7.943	0.110078	Kazakhstan	18.7156		19400000	5.22978	4060000	31.6	0.04922	4.96714	0.55782	0.55714	0.52698	0.96773	0.17969	Kazakhstan	46	0.55782	0.55714	0.52698	0.96773	0.17969	4.96714	0.04922	31.6		4060000	5.22978	8114.58
21	2011	1.04114	67.2637	48.1703	KAZ	-0.0636769	0.00405475	0.110383	0	0	0	1	0	0	-8582644895	56.9	48.889	0.818394	11634	7.805	0.108921	Kazakhstan	18.9638		25200000	7.07623	4270000	50.6	0.14243	5.74258	0.6211	0.75227	0.655645	0.94055	0.267575								5.74258	0.14243	50.6		4270000	7.07623	8302.81
21	2012	1.02811	67.2637	48.1703	KAZ	0.183543	0.0336879	0.163243	0	0	0	1	0	0	-11855850310	56.973	51.3899	0.80861	12386.7	7.572	0.100428	Kazakhstan	19.3824		30200000	9.57325	4360000	61.9066	0.442	5.81254	0.68438	0.9474	0.78431	0.91337	0.35546	Kazakhstan	38	0.68438	0.9474	0.78431	0.91337	0.35546	5.81254	0.442	61.9066		4360000	9.57325	8507.37
21	2013	1.02345	67.2637	48.1703	KAZ	0.205729	0.0423246	0.168491	0	0	0	1	0	0	-8034378287	57.046	53.1796	0.826242	13890.6	7.682	0.0932733	Kazakhstan	19.8248		30400000	11.2928	4390000	63.3042	0.33439	5.96442	0.706325	0.85605	0.76617	0.887635	0.46517								5.96442	0.33439	63.3042		4390000	11.2928	8580.1
21	2014	1.01751	67.2637	48.1703	KAZ	0.235343	0.0553861	0.175625	0	0	0	1	0	0	-4674570616	57.118	54.8386	0.837723	12807.3	8.293	0.0985889	Kazakhstan	20.266		28600000	12.2099	4350000	66	0.84257	5.98546	0.72827	0.7647	0.74803	0.8619	0.57488	Kazakhstan	28	0.72827	0.7647	0.74803	0.8619	0.57488	5.98546	0.84257	66		4350000	12.2099	8641.92
21	2015	0.989995	67.2637	48.1703	KAZ	0.182771	0.0334053	0.163062	0	0	0	1	0	0	-3261447512	57.191	59.2976	0.844928	10510.8	9.429	0.111001	Kazakhstan	20.5617	80.821	26300000	12.9009	4150000	70.8299	0.18527	4.8896	0.72663	0.67896	0.758075	0.851	0.570825								4.8896	0.18527	70.8299	80.821	4150000	12.9009	8542.44
21	2016	0.986217	67.2637	48.1703	KAZ	0.176101	0.0310116	0.161501	0	0	0	1	0	0	-13749208891	57.264	57.8574	0.83623	7714.84	11.919	0.126554	Kazakhstan	20.4169	89.545	25500000	12.9983	3930000	74.5877	0.15521	5.1984	0.72499	0.59322	0.76812	0.8401	0.56677	Kazakhstan	33	0.72499	0.59322	0.76812	0.8401	0.56677	5.1984	0.15521	74.5877	89.545	3930000	12.9983	8514.32
21	2017	1.03076	67.2637	48.1703	KAZ	0.281095	0.0790145	0.186938	0	0	0	1	0	0	-3800894948	57.336	57.3044	0.82847	9247.58	11.6031	0.113563	Kazakhstan	20.4305	91.1614	26700000	14.0657	3690000	76.4267	0.12546	5.84952	0.742345	0.71516	0.81811	0.83945	0.569535								5.84952	0.12546	76.4267	91.1614	3690000	14.0657	8527.14
21	2018	1.01542	67.2637	48.1703	KAZ	0.364019	0.13251	0.208342	0	0	0	1	0	0	-4992569029	57.428	55.4547	0.826411	9812.63	11.2494	0.112979	Kazakhstan	20.5276	92.9662	26100000	13.277	3210000	78.9039	0.11299	5.99119	0.7597	0.8371	0.8681	0.8388	0.5723	Kazakhstan	39	0.7597	0.8371	0.8681	0.8388	0.5723	5.99119	0.11299	78.9039	92.9662	3210000	13.277	8660.64
21	2019	1.02649	67.2637	48.1703	KAZ	0.439772	0.193399	0.228909	0	0	0	1	0	0	-5904427074	57.54	55.5283	0.828269	9812.6	11.5477	0.126151	Kazakhstan	20.6208	92.9973	25700000	13.3975	3070000	81.8776	0.11513	5.63143	0.7986	0.85905	0.8958	0.8627	0.63735								5.63143	0.11513	81.8776	92.9973	3070000	13.3975	8760.52
21	2020	0.935767	67.2637	48.1703	KAZ	0.547341	0.299583	0.259777	0	0	0	1	0	0	-5850294469	57.671	56.1028	0.854616	9121.64	12.2163	0.132916	Kazakhstan	20.6257	94.4591	24300000	13.8067	3090000	85.9426	0.10987	6.25597	0.8375	0.881	0.9235	0.8866	0.7024	Kazakhstan	29	0.8375	0.881	0.9235	0.8866	0.7024	6.25597	0.10987	85.9426	94.4591	3090000	13.8067	8732
21	2021	1.01065	67.2637	48.1703	KAZ	0.658027	0.433	0.293577	0	0	0	1	0	0	-1921124882	57.821	53.9194	0.852712	10373.8	12.6248	0.14006	Kazakhstan	21.1778	95.983	24500000	14.3443	2980000	90.92	0.10461	6.88051	0.8764	0.90295	0.9512	0.9105	0.76745										90.92	95.983	2980000	14.3443	8703.47
24	2006	2.81356	35.8974	33.9223	LBN	-0.737499	0.543905	0.0186478	0	1	0	0	0	0	-1799882372	86.762	72.7943	1.07065	4665.96	0.688	0.00999402	Lebanon	23.0915		1110000	0	681381	15	1.07003	3.2661	0.465333	0.210437	0.358633	0.850193	0.188127								3.2661	1.07003	15		681381	0	1078.69
24	2007	1.27838	35.8974	33.9223	LBN	-0.678194	0.459947	0.0236481	0	1	0	0	0	0	-2527890758	86.901	70.7511	1.06134	5162.03	0.579	0.0090393	Lebanon	23.2969		1260000	1.03959	697540	18.74	1.21734	3.00653	0.474667	0.309763	0.374967	0.860387	0.190553								3.00653	1.21734	18.74		697540	1.03959	1118.38
24	2008	0.889503	35.8974	33.9223	LBN	-0.627611	0.393895	0.0283819	0	1	0	0	0	0	-3346465470	87.042	72.4381	1.06413	5957.7	0.369	0.00555026	Lebanon	23.5064		1430000	2.04599	750000	22.53	1.14144	2.59153	0.484	0.40909	0.3913	0.87058	0.19298	Lebanon	74	0.484	0.40909	0.3913	0.87058	0.19298	2.59153	1.14144	22.53		750000	2.04599	1158.07
24	2009	0.828817	35.8974	33.9223	LBN	-0.619934	0.384318	0.029138	0	1	0	0	0	0	-3677830199	87.187	69.1877	1.07383	7149.79	0.616	0.00995302	Lebanon	23.7223		2390000	3.97889	803740	30.14	2.86034	3.18811	0.461375	0.340255	0.32898	0.864455	0.19472								3.18811	2.86034	30.14		803740	3.97889	1197.77
24	2010	0.903263	35.8974	33.9223	LBN	-0.571463	0.32657	0.0341418	0	1	0	0	0	0	-3793230222	87.334	71.8618	1.05003	7695.25	0.832	0.0123649	Lebanon	23.602		2860000	6.62735	838000	43.68	7.11432	2.79216	0.43875	0.27142	0.26666	0.85833	0.19646	Lebanon	93	0.43875	0.27142	0.26666	0.85833	0.19646	2.79216	7.11432	43.68		838000	6.62735	1237.46
24	2011	0.916907	35.8974	33.9223	LBN	-0.579323	0.335615	0.0333035	0	1	0	0	0	0	-2200405139	87.484	73.54	1.00632	7914.11	0.798	0.0106194	Lebanon	23.3183		3460000	7.97472	855000	52	0.94985	2.3396	0.476315	0.29361	0.37189	0.825015	0.234635								2.3396	0.94985	52		855000	7.97472	1277.15
24	2012	0.974928	35.8974	33.9223	LBN	-0.46291	0.214286	0.0467854	0	1	0	0	0	0	-2081123475	87.636	72.9665	0.963152	8500.18	1.009	0.0107037	Lebanon	23.0868		3760000	9.19571	867000	61.2498	0.64575	2.18024	0.51388	0.3158	0.47712	0.7917	0.27281	Lebanon	87	0.51388	0.3158	0.47712	0.7917	0.27281	2.18024	0.64575	61.2498		867000	9.19571	1316.85
24	2013	1.04015	35.8974	33.9223	LBN	-0.440685	0.194203	0.0496192	0	1	0	0	0	0	-6.8539e+08	87.79	72.0828	0.953269	8255.21	1.273	0.0139268	Lebanon	22.8726		3880000	8.45241	870000	70.5	0.86466	3.13775	0.506055	0.304955	0.415725	0.76455	0.337895								3.13775	0.86466	70.5		870000	8.45241	1356.54
24	2014	0.959481	35.8974	33.9223	LBN	-0.428458	0.183577	0.0512137	0	1	0	0	0	0	-1621802593	87.947	73.7327	0.930955	7665.38	0.214	0.00249917	Lebanon	22.5215		4390000	18.0439	965723	73	1.0384	2.52114	0.49823	0.29411	0.35433	0.7374	0.40298	Lebanon	89	0.49823	0.29411	0.35433	0.7374	0.40298	2.52114	1.0384	73		965723	18.0439	1396.24
24	2015	0.944769	35.8974	33.9223	LBN	-0.342987	0.11764	0.0630642	0	1	0	0	0	0	-1499077656	88.106	73.8065	0.908431	7802.75	0.507	0.00563915	Lebanon	22.107		4660000	15.8879	1010000	74	0.81808	2.25233	0.531415	0.39282	0.43441	0.71278	0.44706								2.25233	0.81808	74		1010000		1435.93
24	2016	1.03529	35.8974	33.9223	LBN	-0.240798	0.0579837	0.0788499	0	1	0	0	0	0	-1563742344	88.266	74.2025	0.894408	8172.3	0.431	0.00421442	Lebanon	21.8373		4280000	13.732	1820000	76.11	0.8309	2.29646	0.5646	0.49153	0.51449	0.68816	0.49114	Lebanon	73	0.5646	0.49153	0.51449	0.68816	0.49114	2.29646	0.8309	76.11		1820000		1475.62
24	2017	0.950766	35.8974	33.9223	LBN	-0.265448	0.0704629	0.0748808	0	1	0	0	0	0	-1204975686	88.429	75.4188	0.872442	8679.9	0.50285	0.00645476	Lebanon	21.5148		4400000	11.576	907881	78.1808	0.90864	2.33846	0.5588	0.467665	0.493345	0.67653	0.50652								2.33846	0.90864	78.1808		907881		1515.32
24	2018	0.965634	35.8974	33.9223	LBN	-0.274426	0.0753099	0.0734607	0	1	0	0	0	0	-2026788724	88.593	76.9908	0.85063	9225.85	0.46852	0.00430294	Lebanon	21.1292		4420000	9.42001	893529	80.9	0.68314	3.0673	0.553	0.4438	0.4722	0.6649	0.5219	Lebanon	99	0.553	0.4438	0.4722	0.6649	0.5219	3.0673	0.68314	80.9		893529		1555.01
24	2019	0.895953	35.8974	33.9223	LBN	-0.372688	0.138897	0.0588064	0	1	0	0	0	0	-1567351398	88.758	78.7817	0.822587	8985.57	1.11502	0.0102363	Lebanon	20.4793		4240000	7.26404	882175	79.7589	0.6713	2.60769	0.52425	0.38855	0.4449	0.6608	0.4671								2.60769	0.6713	79.7589		882175	7.26404	1594.7
24	2020	0.85508	35.8974	33.9223	LBN	-0.452112	0.204405	0.0481518	0	1	0	0	0	0	-1612858504	88.925	87.4214	0.848164	5599.96	1.20959	0.0106117	Lebanon	20.47		4290000	7.6298	875480	83.1038	0.69081	1.9178	0.4955	0.3333	0.4176	0.6567	0.4123	Lebanon	127	0.4955	0.3333	0.4176	0.6567	0.4123	1.9178	0.69081	83.1038		875480	7.6298	1634.4
24	2021	1.34207	35.8974	33.9223	LBN	-0.484759	0.234991	0.0440808	0	1	0	0	0	0	-5.69134e+08	89.093	94.1483	0.836373	4136.15	1.128	0.010203	Lebanon	20.772		4290000	7.7257	875480	86.589	0.54929	3.0439	0.46675	0.27805	0.3903	0.6526	0.3575								3.0439	0.54929	86.589		875480	7.7257	1674.09
26	2006	3.17753	23.9048	55.3358	LTU	-0.1725	0.0297561	0.0903823	0	0	0	0	0	1	-1739365665	66.706	56.3545	1.37107	9230.71	0.431	0.00360876	Lithuania	29.5709	81.3665	4720000	11.0961	792357	43.9	4.67447	6.01374	0.606313	0.233163	0.55161	0.96293	0.30495								6.01374	4.67447	43.9	81.3665	792357	11.0961	1428.95
26	2007	0.976704	23.9048	55.3358	LTU	-0.0581919	0.0033863	0.111444	0	0	0	0	0	1	-1726313224	66.777	56.69	1.3917	12285.4	0.577	0.00165294	Lithuania	30.5486	85.5685	4910000	17.0833	799436	49.9	3.87505	5.80261	0.634007	0.355217	0.58015	0.96586	0.3571								5.80261	3.87505	49.9	85.5685	799436	17.0833	1451.58
26	2008	0.854602	23.9048	55.3358	LTU	0.00393678	1.54983e-05	0.123816	0	0	0	0	0	1	-1172513251	66.848	57.2464	1.38149	14945	0.598	0.00308763	Lithuania	30.5167	87.9145	5020000	18.3013	784935	55.22	3.02062	4.70058	0.6617	0.47727	0.60869	0.96879	0.40925	Lithuania	28	0.6617	0.47727	0.60869	0.96879	0.40925	4.70058	3.02062	55.22	87.9145	784935	18.3013	1427.1
26	2009	0.823424	23.9048	55.3358	LTU	-0.0440734	0.00194246	0.114198	0	0	0	0	0	1	9.64688e+08	66.842	62.5771	1.21536	11820.8	0.68	-0.00307089	Lithuania	26.8489	90.8119	4960000	19.9272	747412	59.76	2.48696	3.86127	0.64561	0.50292	0.54561	0.968975	0.425285								3.86127	2.48696	59.76		747412	19.9272	1317.4
26	2010	1.27404	23.9048	55.3358	LTU	-0.05184	0.00268738	0.112679	0	0	0	0	0	1	-9.95861e+08	66.757	60.7263	1.09263	11987.5	0.904996	0.0297289	Lithuania	24.5595	93.7093	4890000	21.6412	753439	62.12	2.71001	4.11837	0.62952	0.52857	0.48253	0.96916	0.44132	Lithuania	28	0.62952	0.52857	0.48253	0.96916	0.44132	4.11837	2.71001	62.12	93.7093	753439	21.6412	1247.65
26	2011	1.38936	23.9048	55.3358	LTU	0.0575273	0.00330939	0.135011	0	0	0	0	0	1	-1065438728	66.741	58.4836	1.05982	14376.9	1.105	0.0342443	Lithuania	24.5581	94.3513	4940000	23.4757	711909	63.64	2.40166	3.69669	0.681405	0.527435	0.590935	0.946585	0.50892								3.69669	2.40166	63.64		711909	23.4757	1253.62
26	2012	0.971541	23.9048	55.3358	LTU	0.184707	0.0341166	0.163516	0	0	0	0	0	1	-2.55288e+08	66.864	58.4766	1.04645	14367.7	1.17632	0.0343186	Lithuania	25.0833	94.9933	5000000	25.0988	675394	67.23	2.26514	3.63475	0.73329	0.5263	0.69934	0.92401	0.57652	Lithuania	29	0.73329	0.5263	0.69934	0.92401	0.57652	3.63475	2.26514	67.23	94.9933	675394	25.0988	1275.72
26	2013	0.990561	23.9048	55.3358	LTU	0.224348	0.0503321	0.172959	0	0	0	0	0	1	-4.368e+08	66.986	59.7291	1.06382	15729.7	1.54378	0.0389769	Lithuania	25.5251		4570000	27.6139	625990	68.4529	2.42759	3.6115	0.73019	0.586675	0.72762	0.889855	0.5731								3.6115	2.42759	68.4529		625990	27.6139	1292.78
26	2014	1.08241	23.9048	55.3358	LTU	0.273638	0.0748777	0.18507	0	0	0	0	0	1	1.88404e+08	67.108	59.4997	1.02199	16551	1.54698	0.0412039	Lithuania	24.7237		4270000	26.774	586694	72.13	2.93856	4.06887	0.72709	0.64705	0.7559	0.8557	0.56968	Lithuania	29	0.72709	0.64705	0.7559	0.8557	0.56968	4.06887	2.93856	72.13		586694	26.774	1319.03
26	2015	0.966447	23.9048	55.3358	LTU	0.402184	0.161752	0.218583	0	0	0	0	0	1	-6.80317e+08	67.23	59.905	1.0303	14264	1.73231	0.0411282	Lithuania	25.0726		4180000	28.1162	561919	71.3781	3.94683	5.10225	0.75088	0.73878	0.790995	0.86372	0.597935								5.10225	3.94683	71.3781		561919	28.1162	1334.92
26	2016	0.975125	23.9048	55.3358	LTU	0.500365	0.250365	0.246056	0	0	0	0	0	1	-2.64619e+08	67.366	60.9366	1.02957	15008.3	2.18948	0.0488979	Lithuania	25.1374		4200000	29.2385	530871	74.3766	3.86378	5.49954	0.77467	0.83051	0.82609	0.87174	0.62619	Lithuania	23	0.77467	0.83051	0.82609	0.87174	0.62619	5.49954	3.86378	74.3766		530871	29.2385	1361.4
26	2017	1.00014	23.9048	55.3358	LTU	0.487236	0.237399	0.242289	0	0	0	0	0	1	-9.32827e+08	67.516	60.4381	1.01919	16885.4	2.6072	0.0540879	Lithuania	25.1338		4360000	27.5016	486895	77.6153	4.07604	5.75606	0.764035	0.816955	0.812345	0.85202	0.627745								5.75606	4.07604	77.6153		486895	27.5016	1354.8
26	2018	0.996138	23.9048	55.3358	LTU	0.43213	0.186736	0.22679	0	0	0	0	0	1	-2.6013e+08	67.679	61.4232	1.03735	19186.4	2.2763	0.0541436	Lithuania	25.7673		3760000	27.4238	427066	79.7226	3.47902	4.8859	0.7534	0.8034	0.7986	0.8323	0.6293	Lithuania	40	0.7534	0.8034	0.7986	0.8323	0.6293	4.8859	3.47902	79.7226		427066	27.4238	1374.72
26	2019	0.963705	23.9048	55.3358	LTU	0.533464	0.284584	0.255685	0	0	0	0	0	1	-1272922206	67.855	61.4981	1.03227	19595.1	2.54264	0.0550181	Lithuania	25.6997		3700000	27.7429	368213	81.5819	3.44376	5.08148	0.80995	0.77075	0.82575	0.87705	0.7271								5.08148	3.44376	81.5819		368213	27.7429	1378.42
26	2020	0.943411	23.9048	55.3358	LTU	0.670162	0.449117	0.297408	0	0	0	0	0	1	-628994647	68.046	61.3501	1.05097	20339.5	2.65108	0.0507682	Lithuania	25.3646		3670000	28.2513	322108	83.0555	3.92454	6.18066	0.8665	0.7381	0.8529	0.9218	0.8249	Lithuania	20	0.8665	0.7381	0.8529	0.9218	0.8249	6.18066	3.92454	83.0555		322108	28.2513	1358.15
26	2021	1.0511	23.9048	55.3358	LTU	0.748617	0.560427	0.322777	0	0	0	0	0	1	-1417338114	68.249	60.7367	1.058	23723.3	2.62398	0.054366	Lithuania	26.2762		3730000	28.7935	290711	86.9306	3.42643	5.6514	0.92305	0.70545	0.88005	0.96655	0.9227								5.6514	3.42643	86.9306		290711	28.7935	1368.62
27	2006	2.53854	24.9314	56.8542	LVA	-0.244937	0.0599939	0.0781764	0	0	0	0	0	1	-1493147462	67.967	64.5328	1.26899	9723.45	2.759	0.0361148	Latvia	27.3691	83.5125	2180000	4.97633	657380	53.63	2.83177	6.28765	0.601493	0.192157	0.47246	0.955133	0.378367								6.28765	2.83177	53.63	83.5125	657380	4.97633	1030.92
27	2007	1.03442	24.9314	56.8542	LVA	-0.174871	0.0305798	0.0899687	0	0	0	0	0	1	-1944010190	67.9	64.0256	1.30445	14113.5	2.801	0.0379761	Latvia	28.6334	84.7672	2220000	15.5584	644043	59.17	3.42414	6.05777	0.597947	0.209713	0.46031	0.960267	0.376213								6.05777	3.42414	59.17	84.7672	644043	15.5584	1057.45
27	2008	0.934048	24.9314	56.8542	LVA	-0.127031	0.0161368	0.0984962	0	0	0	0	0	1	-1091444008	67.834	65.3284	1.33088	16467.1	3.181	0.0399453	Latvia	29.3989	89.5111	2300000	19.1641	592850	63.41	4.61009	6.01356	0.5944	0.22727	0.44816	0.9654	0.37406	Latvia	36	0.5944	0.22727	0.44816	0.9654	0.37406	6.01356	4.61009	63.41	89.5111	592850	19.1641	1054.92
27	2009	0.74859	24.9314	56.8542	LVA	-0.10422	0.0108617	0.102698	0	0	0	0	0	1	-4.36511e+07	67.814	65.8613	1.10193	12331.9	3.521	0.0401552	Latvia	24.3431	88.6513	2300000	21.3856	561650	66.84	5.64397	5.6367	0.588505	0.249345	0.432015	0.9631	0.375135								5.6367	5.64397	66.84		561650	21.3856	908.5
27	2010	1.0293	24.9314	56.8542	LVA	-0.0861256	0.00741762	0.106094	0	0	0	0	0	1	-3.72158e+08	67.841	64.4883	1.02655	11421	3.6027	0.0382111	Latvia	23.0743	87.7915	2310000	20.6933	532100	68.42	5.77179	6.42495	0.58261	0.27142	0.41587	0.9608	0.37621	Latvia	37	0.58261	0.27142	0.41587	0.9608	0.37621	6.42495	5.77179	68.42		532100	20.6933	850.675
27	2011	1.43464	24.9314	56.8542	LVA	-0.032202	0.00103697	0.11654	0	0	0	0	0	1	-1411691737	67.869	64.1287	0.988623	13339	3.04587	0.0339144	Latvia	22.9083	86.9316	2310000	22.0235	516344	69.75	5.38858	5.44173	0.621505	0.24096	0.50205	0.924335	0.44065								5.44173	5.38858	69.75		516344	22.0235	861.575
27	2012	1.11966	24.9314	56.8542	LVA	0.0904364	0.00817874	0.142125	0	0	0	0	0	1	-9.19475e+08	67.897	64.4217	0.979434	13847.3	4.07809	0.0447285	Latvia	23.477	86.0718	2630000	23.1853	476141	73.1199	6.13792	5.9601	0.6604	0.2105	0.58823	0.88787	0.50509	Latvia	42	0.6604	0.2105	0.58823	0.88787	0.50509	5.9601	6.13792	73.1199	86.0718	476141	23.1853	875.625
27	2013	0.903879	24.9314	56.8542	LVA	0.298268	0.0889638	0.191276	0	0	0	0	0	1	-4.9413e+08	67.925	64.7954	0.996993	15007.5	3.45896	0.0376445	Latvia	23.9217		2560000	24.4156	423000	75.2344	7.6713	7.0245	0.689075	0.45819	0.644505	0.858335	0.56438								7.0245	7.6713	75.2344		423000	24.4156	893.875
27	2014	1.03786	24.9314	56.8542	LVA	0.527624	0.278387	0.253973	0	0	0	0	0	1	-3.49596e+08	67.952	65.5722	0.985767	15742.4	2.7601	0.034155	Latvia	23.8475		2380000	25.1114	400000	75.83	9.66697	8.77431	0.71775	0.70588	0.70078	0.8288	0.62367	Latvia	31	0.71775	0.70588	0.70078	0.8288	0.62367	8.77431	9.66697	75.83		400000	25.1114	884.65
27	2015	1.0666	24.9314	56.8542	LVA	0.535733	0.28701	0.256352	0	0	0	0	0	1	-669889911	67.98	65.3608	0.971654	13786.5	2.7558	0.0319004	Latvia	23.6456		2590000	25.2768	356000	79.2006	11.3643	10.004	0.699375	0.61565	0.65474	0.84	0.60339								10.004	11.3643	79.2006		356000	25.2768	896.075
27	2016	1.02164	24.9314	56.8542	LVA	0.455083	0.207101	0.233184	0	0	0	0	0	1	-9.00594e+07	68.021	65.5908	0.987658	14331.8	3.47258	0.0355837	Latvia	24.114		2650000	26.3066	362940	79.8421	10.4723	9.96727	0.681	0.52542	0.6087	0.8512	0.58311	Latvia	45	0.681	0.52542	0.6087	0.8512	0.58311	9.96727	10.4723	79.8421		362940	26.3066	893.275
27	2017	1.10364	24.9314	56.8542	LVA	0.461688	0.213156	0.23504	0	0	0	0	0	1	-6.17275e+08	68.075	64.764	0.945124	15695.1	5.43403	0.0498485	Latvia	23.3072		2460000	26.9186	342296	80.1141	9.23198	9.24702	0.6903	0.60541	0.6377	0.8322	0.600955								9.24702	9.23198	80.1141		342296	26.9186	894.825
27	2018	1.13976	24.9314	56.8542	LVA	0.475489	0.22609	0.238942	0	0	0	0	0	1	-739618749	68.142	64.5538	0.952544	17865	3.48318	0.034813	Latvia	23.6607		2070000	27.1744	266214	83.5772	8.43573	8.24197	0.6996	0.6854	0.6667	0.8132	0.6188	Latvia	57	0.6996	0.6854	0.6667	0.8132	0.6188	8.24197	8.43573	83.5772		266214	27.1744	909.375
27	2019	0.865272	24.9314	56.8542	LVA	0.538427	0.289903	0.257145	0	0	0	0	0	1	-1025449977	68.222	64.0859	0.952717	17945.2	3.17852	0.0321204	Latvia	23.7191		2070000	26.5541	235527	86.1355	8.94257	8.58355	0.7397	0.63435	0.62455	0.8652	0.72935								8.58355	8.94257	86.1355		235527	26.5541	910.025
27	2020	1.07214	24.9314	56.8542	LVA	0.683087	0.466608	0.301516	0	0	0	0	0	1	-7.42834e+08	68.315	63.4223	0.979444	18207.1	3.62894	0.037384	Latvia	23.6384		2050000	25.8595	211909	88.898	10.9411	10.7964	0.7798	0.5833	0.5824	0.9172	0.8399	Latvia	49	0.7798	0.5833	0.5824	0.9172	0.8399	10.7964	10.9411	88.898		211909	25.8595	892.975
27	2021	0.989917	24.9314	56.8542	LVA	0.639935	0.409517	0.287911	0	0	0	0	0	1	-1044340520	68.421	63.6752	0.948221	21148.2	3.58089	0.0374633	Latvia	23.5498		2160000	26.1387	192088	91.1796	8.88753	8.99703	0.8199	0.53225	0.54025	0.9692	0.95045								8.99703	8.88753	91.1796		192088	26.1387	869.475
28	2006	6.09347	28.4683	47.2057	MDA	-0.988789	0.977704	0.00404248	0	0	0	0	1	0	-259400000	42.744	52.649	0.843448	1183.02	0.365	0.0158599	Moldova	18.1912		1360000	0.552711	1020000	19.6206	0.26323	3.29187	0.38092	0.0227267	0.13957	0.87771	0.126943								3.29187	0.26323	19.6206		1020000	0.552711	1257.3
28	2007	0.828057	28.4683	47.2057	MDA	-0.891829	0.795358	0.00841597	0	0	0	0	1	0	-523900000	42.713	55.9736	0.85401	1531.22	0.354	0.0139077	Moldova	18.746		1880000	1.36209	1080000	20.45	0.22341	3.467	0.41596	0.0454533	0.2253	0.88542	0.140077								3.467	0.22341	20.45		1080000	1.36209	1247.2
28	2008	0.930456	28.4683	47.2057	MDA	-0.819821	0.672106	0.0126901	0	0	0	0	1	0	-695380000	42.682	56.43	0.89056	2110.56	0.385	0.0141627	Moldova	19.6723		2420000	3.02241	1110000	23.39	0.17356	2.40719	0.451	0.06818	0.31103	0.89313	0.15321	Republic of Moldova	93	0.451	0.06818	0.31103	0.89313	0.15321	2.40719	0.17356	23.39		1110000	3.02241	1251.05
28	2009	0.754006	28.4683	47.2057	MDA	-0.724128	0.524362	0.0197234	0	0	0	0	1	0	-268740000	42.651	60.0498	0.872614	1898.44	0.354	0.00867733	Moldova	19.2772	78	2140000	5.00508	1140000	27.5	0.53419	3.89765	0.45607	0.13409	0.30313	0.896515	0.173265								3.89765	0.53419	27.5	78	1140000	5.00508	1184.38
28	2010	1.49294	28.4683	47.2057	MDA	-0.67633	0.457422	0.0238149	0	0	0	0	1	0	-290090000	42.62	54.5367	0.829871	2436.8	0.403	0.00914438	Moldova	18.6534		2550000	7.36113	1160000	29.68	0.67686	3.94287	0.46114	0.2	0.29523	0.8999	0.19332	Republic of Moldova	80	0.46114	0.2	0.29523	0.8999	0.19332	3.94287	0.67686	29.68		1160000	7.36113	1143.37
28	2011	1.42141	28.4683	47.2057	MDA	-0.53059	0.281526	0.0386691	0	0	0	0	1	0	-337150000	42.589	53.5724	0.809043	2941.36	0.348	0.00572928	Moldova	18.7471		3220000	9.91131	1180000	32.07	0.56156	3.45045	0.51187	0.29735	0.40578	0.85638	0.275965								3.45045	0.56156	32.07		1180000	9.91131	1173.49
28	2012	0.710743	28.4683	47.2057	MDA	-0.38002	0.144415	0.0577783	0	0	0	0	1	0	-224600000	42.558	54.4512	0.804288	3044.81	0.266	0.00548941	Moldova	19.2788		3580000	11.9332	1210000	34.65	0.25683	3.34102	0.5626	0.3947	0.51633	0.81286	0.35861	Republic of Moldova	69	0.5626	0.3947	0.51633	0.81286	0.35861	3.34102	0.25683	34.65		1210000	11.9332	1146.78
28	2013	1.15382	28.4683	47.2057	MDA	-0.332134	0.110313	0.0646571	0	0	0	0	1	0	-211120000	42.527	52.7992	0.737264	3321.04	0.314	0.00800812	Moldova	17.6898		3700000	13.7381	1220000	37.44	0.17385	3.32236	0.55984	0.511075	0.52194	0.76648	0.39108								3.32236	0.17385	37.44		1220000	13.7381	1172.77
28	2014	1.11535	28.4683	47.2057	MDA	-0.288802	0.0834068	0.071215	0	0	0	0	1	0	-305070000	42.496	52.2828	0.71896	3327.79	0.332	0.00574037	Moldova	17.3929		3740000	15.253	1220000	40.5	0.19557	3.09638	0.55708	0.62745	0.52755	0.7201	0.42355	Republic of Moldova	66	0.55708	0.62745	0.52755	0.7201	0.42355	3.09638	0.19557	40.5		1220000	15.253	981.539
28	2015	0.940817	28.4683	47.2057	MDA	-0.222913	0.0496902	0.0817938	0	0	0	0	1	0	-218560000	42.49	52.9819	0.703387	2731.07	0.284	0.00278598	Moldova	17.1172		3710000	16.3055	1200000	43.1	0.25736	3.22974	0.578265	0.644235	0.560875	0.719615	0.45428								3.22974	0.25736	43.1		1200000	16.3055	989.132
28	2016	1.01559	28.4683	47.2057	MDA	-0.151587	0.0229787	0.0940708	0	0	0	0	1	0	-74110000	42.511	53.9684	0.671467	2879.39	0.247	0.00231063	Moldova	16.3941		3790000	17.2832	1170000	46.7	0.28112	3.50305	0.59945	0.66102	0.5942	0.71913	0.48501	Republic of Moldova	65	0.59945	0.66102	0.5942	0.71913	0.48501	3.50305	0.28112	46.7		1170000	17.2832	1591.34
28	2017	1.13473	28.4683	47.2057	MDA	-0.0272593	0.000743069	0.117522	0	0	0	0	1	0	-138650000	42.557	53.1993	0.635949	3509.65	0.314	0.0067631	Moldova	15.6828		3750000	18.3722	1140000	49.9	0.2753	3.86709	0.629225	0.76031	0.6825	0.723265	0.481855								3.86709	0.2753	49.9		1140000	18.3722	1524.12
28	2018	1.02294	28.4683	47.2057	MDA	0.0853605	0.00728641	0.141016	0	0	0	0	1	0	-259490000	42.629	53.5526	0.627635	4232.21	0.32924	0.00625991	Moldova	15.5901		3640000	19.8335	1110000	50.3	0.2328	4.03442	0.659	0.8596	0.7708	0.7274	0.4787	Republic of Moldova	69	0.659	0.8596	0.7708	0.7274	0.4787	4.03442	0.2328	50.3		1110000	19.8335	1470.25
28	2019	0.96694	28.4683	47.2057	MDA	0.121714	0.0148142	0.149056	0	0	0	0	1	0	-468350000	42.726	54.3166	0.627161	4493.37	0.37499	0.00553699	Moldova	15.614		3610000	21.564	1070000	57.7605	0.26006	4.02162	0.67355	0.81075	0.76185	0.7353	0.5235								4.02162	0.26006	57.7605		1070000	21.564	1485.45
28	2020	0.789546	28.4683	47.2057	MDA	0.158685	0.025181	0.157462	0	0	0	0	1	0	-152090000	42.849	55.4538	0.662533	4500.62	0.36	0.0037286	Moldova	15.9899		3420000	23.3075	1030000	59.1529	0.21313	4.65007	0.6881	0.7619	0.7529	0.7432	0.5683	Republic of Moldova	79	0.6881	0.7619	0.7529	0.7432	0.5683	4.65007	0.21313	59.1529		1030000	23.3075	1480.69
28	2021	1.1128	28.4683	47.2057	MDA	0.164183	0.0269561	0.158732	0	0	0	0	1	0	-381960000	42.998	54.8548	0.662995	5230.66	0.437	0.0155413	Moldova	16.466		3900000	24.9006	1000000	61.2878	0.17526	4.10498	0.70265	0.71305	0.74395	0.7511	0.6131								4.10498	0.17526	61.2878		1000000	24.9006	1525.42
29	2006	2.78338	109.709	3.79085	MYS	1.36924	1.87482	0.560056	1	0	0	0	0	0	-5.31395e+07	67.483	43.9263	1.40296	6137.11	6.378	0.0559532	Malaysia	30.2586		19500000	2.83296	4340000	51.638	42.7034	36.0691	0.58248	0.214883	0.609807	0.833007	0.303933								36.0691	42.7034	51.638		4340000	2.83296	10328.2
29	2007	1.01031	109.709	3.79085	MYS	1.28738	1.65734	0.525037	1	0	0	0	0	0	2744191223	68.36	44.5202	1.29663	7143.94	6.433	0.056516	Malaysia	28.4616		23300000	3.82097	4350000	55.7	39.3504	33.5025	0.59439	0.255167	0.642693	0.836013	0.303077								33.5025	39.3504	55.7		4350000	3.82097	10513.7
29	2008	1.00153	109.709	3.79085	MYS	0.758175	0.574829	0.325939	1	0	0	0	0	0	7827500376	69.225	43.9481	1.29804	8343.39	7.396	0.0716894	Malaysia	28.6735		27700000	4.80511	4510000	55.8	24.4822	23.3579	0.6063	0.29545	0.67558	0.83902	0.30222	Malaysia	34	0.6063	0.29545	0.67558	0.83902	0.30222	23.3579	24.4822	55.8		4510000	4.80511	10715.1
29	2009	0.939846	109.709	3.79085	MYS	1.23615	1.52807	0.5037	1	0	0	0	0	0	6626128852	70.075	48.836	1.22276	7167.88	7.977	0.0780882	Malaysia	27.0123		30100000	5.50586	4520000	55.9	36.4627	30.1126	0.60822	0.476295	0.65366	0.84664	0.322985								30.1126	36.4627	55.9		4520000	5.50586	11020.2
29	2010	1.05326	109.709	3.79085	MYS	1.24107	1.54026	0.50573	1	0	0	0	0	0	4463611679	70.912	48.4774	1.22846	8880.11	7.427	0.0741407	Malaysia	27.6127		33900000	7.30489	4610000	56.3	34.0057	29.8032	0.61014	0.65714	0.63174	0.85426	0.34375	Malaysia	32	0.61014	0.65714	0.63174	0.85426	0.34375	29.8032	34.0057	56.3		4610000	7.30489	11291.4
29	2011	1.01108	109.709	3.79085	MYS	1.10332	1.21732	0.450433	1	0	0	0	0	0	2988958790	71.609	47.7667	1.1896	10209.4	8.631	0.0868029	Malaysia	27.5653		36700000	8.58926	4520000	61	29.439	25.6232	0.640225	0.57857	0.71129	0.811685	0.397365								25.6232	29.439	61		4520000	8.58926	12219.6
29	2012	1.00693	109.709	3.79085	MYS	1.07205	1.14929	0.438326	1	0	0	0	0	0	8001103526	72.275	49.0224	1.15041	10601.5	10.601	0.106859	Malaysia	27.5753		41300000	9.84787	4590000	65.8	27.9008	23.1197	0.67031	0.5	0.79084	0.76911	0.45098	Malaysia	40	0.67031	0.5	0.79084	0.76911	0.45098	23.1197	27.9008	65.8		4590000	9.84787	12545
29	2013	0.95829	109.709	3.79085	MYS	0.983531	0.967332	0.404948	1	0	0	0	0	0	2111932222	72.93	49.9447	1.16457	10727.7	13.086	0.128544	Malaysia	27.9426		43000000	9.75218	4540000	57.0575	28.2119	22.6244	0.640915	0.514705	0.734	0.740505	0.44822								22.6244	28.2119	57.0575		4540000	9.75218	13352.3
29	2014	0.983592	109.709	3.79085	MYS	0.967909	0.936848	0.399195	1	0	0	0	0	0	5440442809	73.577	50.1227	1.14696	11045.4	14.434	0.140755	Malaysia	27.747		44900000	10.0012	4410000	63.6654	28.7284	23.0843	0.61152	0.52941	0.67716	0.7119	0.44546	Malaysia	52	0.61152	0.52941	0.67716	0.7119	0.44546	23.0843	28.7284	63.6654		4410000	10.0012	13852.7
29	2015	1.01301	109.709	3.79085	MYS	1.0705	1.14598	0.437732	1	0	0	0	0	0	6.84809e+08	74.213	52.0139	1.13082	9699.58	16.564	0.172435	Malaysia	27.5188	97.5001	44100000	9.86133	4490000	71.0641	30.0498	24.0108	0.614505	0.60369	0.697275	0.70362	0.442605								24.0108	30.0498	71.0641	97.5001	4490000	9.86133	14067.7
29	2016	1.01555	109.709	3.79085	MYS	1.14559	1.31237	0.46706	1	0	0	0	0	0	-3372772123	74.84	52.5315	1.1258	9555.65	21.168	0.206891	Malaysia	27.4868	97.5857	43500000	8.62388	4840000	78.7883	30.5346	24.6995	0.61749	0.67797	0.71739	0.69534	0.43975	Malaysia	60	0.61749	0.67797	0.71739	0.69534	0.43975	24.6995	30.5346	78.7883		4840000	8.62388	14163.7
29	2017	1.03464	109.709	3.79085	MYS	1.30869	1.71266	0.534044	1	0	0	0	0	0	-3760088630	75.447	51.882	1.11534	9979.8	27.678	0.276678	Malaysia	27.5048	97.6712	42300000	8.40573	6580000	80.1405	31.0172	25.2164	0.667445	0.782785	0.803145	0.69702	0.502225								25.2164	31.0172	80.1405	97.6712	6580000	8.40573	11568.2
29	2018	0.983381	109.709	3.79085	MYS	1.48198	2.19628	0.610133	1	0	0	0	0	0	-2539145749	76.036	52.991	1.10737	11074.1	27.869	0.287965	Malaysia	27.5064	97.9348	42400000	8.32117	7430000	81.201	32.989	25.0823	0.7174	0.8876	0.8889	0.6987	0.5647	Malaysia	48	0.7174	0.8876	0.8889	0.6987	0.5647	25.0823	32.989	81.201	97.9348	7430000	8.32117	14851.1
29	2019	1.0186	109.709	3.79085	MYS	1.5029	2.25872	0.61966	1	0	0	0	0	0	-1626970695	76.607	54.1549	1.10452	11132	29.217	0.295279	Malaysia	27.4985	97.9425	44600000	9.037	7410000	84.1871	32.2268	24.1402	0.7533	0.87235	0.8709	0.725	0.66405								24.1402	32.2268	84.1871	97.9425	7410000	9.037	15155.3
29	2020	0.957841	109.709	3.79085	MYS	1.69626	2.8773	0.711218	1	0	0	0	0	0	-7.62778e+08	77.16	54.7633	1.14997	10160.8	29.5763	0.287082	Malaysia	27.7539	98.2354	43700000	10.1169	7470000	89.555	34.6876	26.8251	0.7892	0.8571	0.8529	0.7513	0.7634	Malaysia	47	0.7892	0.8571	0.8529	0.7513	0.7634	26.8251	34.6876	89.555	98.2354	7470000	10.1169	14222.1
29	2021	1.10487	109.709	3.79085	MYS	1.72889	2.98908	0.727292	1	0	0	0	0	0	-6836560204	77.696	51.5517	1.13776	11109.3	29.8815	0.285371	Malaysia	28.2572	98.7395	47200000	11.122	8250000	96.7514	32.1875	27.0374	0.8251	0.84185	0.8349	0.7776	0.86275								27.0374	32.1875	96.7514	98.7395	8250000	11.122	13288.9
30	2006	2.58077	69.3946	29.9695	PAK	-0.89001	0.792118	0.00851313	0	0	1	0	0	0	-4164000000	34.184	52.6313	0.961218	770.843	31.633	0.317047	Pakistan	20.7312		34500000	0.0149441	5240000	6.5	0.61438	8.60164	0.294387	0.114953	0.426193	0.421953	0.0338733								8.60164	0.61438	6.5		5240000	0.0149441	44138.9
30	2007	0.945274	69.3946	29.9695	PAK	-0.929993	0.864888	0.00650527	0	0	1	0	0	0	-5492000000	34.387	52.7635	0.955887	837.632	28.42	0.284378	Pakistan	20.9822		62900000	0.0248196	4810000	6.8	0.53184	6.65637	0.305193	0.102927	0.425467	0.443907	0.0439167								6.65637	0.53184	6.8		4810000	0.0248196	45126.4
30	2008	0.968889	69.3946	29.9695	PAK	-0.960824	0.923182	0.00514117	0	0	1	0	0	0	-5389000000	34.59	53.1065	0.91064	914.731	27.506	0.274585	Pakistan	20.1158		88000000	0.0903997	4420000	7	0.42882	5.06115	0.316	0.0909	0.42474	0.46586	0.05396	Pakistan	131	0.316	0.0909	0.42474	0.46586	0.05396	5.06115	0.42882	7		4420000	0.0903997	46408.7
30	2009	1.00426	69.3946	29.9695	PAK	-1.06157	1.12694	0.00180142	0	0	1	0	0	0	-2267000000	34.793	53.1104	0.949906	884.441	29.092	0.286706	Pakistan	20.9847		94300000	0.205987	6140000	7.5	0.19283	3.06659	0.295735	0.13116	0.336175	0.48421	0.065525								3.06659	0.19283	7.5		6140000	0.205987	48211.3
30	2010	1.00528	69.3946	29.9695	PAK	-1.09479	1.19856	0.00107569	0	0	1	0	0	0	-1975000000	34.997	52.839	0.95287	911.09	32.769	0.323024	Pakistan	21.4181		99200000	0.406001	6080000	8	0.19897	3.34597	0.27547	0.17142	0.24761	0.50256	0.07709	Pakistan	146	0.27547	0.17142	0.24761	0.50256	0.07709	3.34597	0.19897	8		6080000	0.406001	49391.2
30	2011	1.0794	69.3946	29.9695	PAK	-1.06846	1.1416	0.00163579	0	0	1	0	0	0	-1264000000	35.202	50.9281	0.939417	1075.45	29.678	0.291297	Pakistan	21.7681		109000000	0.587253	5720000	8	0.23682	3.55526	0.278905	0.15151	0.30681	0.429865	0.10047								3.55526	0.23682	8		5720000	0.587253	51382.2
30	2012	1.06462	69.3946	29.9695	PAK	-1.02554	1.05173	0.00279921	0	0	1	0	0	0	-782000000	35.408	51.5739	0.931924	1109.68	31.109	0.299069	Pakistan	22.3382		120000000	0.750131	5860000	8.1	0.24076	4.35684	0.28234	0.1316	0.36601	0.35717	0.12385	Pakistan	156	0.28234	0.1316	0.36601	0.35717	0.12385	4.35684	0.24076	8.1		5860000	0.750131	52701.7
30	2013	1.08064	69.3946	29.9695	PAK	-1.03346	1.06804	0.00256119	0	0	1	0	0	0	-1121000000	35.613	52.0095	0.955321	1126.04	33.8217	0.326087	Pakistan	22.9219		128000000	0.792892	6370000	9	0.23325	3.78709	0.270165	0.232465	0.34442	0.345435	0.12064								3.78709	0.23325	9		6370000	0.792892	54021.2
30	2014	1.01271	69.3946	29.9695	PAK	-1.00409	1.00819	0.0034973	0	0	1	0	0	0	-1765000000	35.819	51.7012	0.945494	1173.39	34.842	0.334664	Pakistan	22.8732		136000000	0.964547	4900000	10	0.19398	4.58587	0.25799	0.33333	0.32283	0.3337	0.11743	Pakistan	158	0.25799	0.33333	0.32283	0.3337	0.11743	4.58587	0.19398	10		4900000	0.964547	55022.9
30	2015	1.01436	69.3946	29.9695	PAK	-0.987303	0.974767	0.00409756	0	0	1	0	0	0	-1648000000	36.026	52.1605	0.987026	1282.44	37.472	0.352856	Pakistan	24.0196		126000000	0.849981	3540000	11	0.24124	4.90044	0.258155	0.353105	0.32446	0.32634	0.12366								4.90044	0.24124	11		3540000	0.849981	55277.6
30	2016	0.960928	69.3946	29.9695	PAK	-0.971944	0.944675	0.00468849	0	0	1	0	0	0	-2524000000	36.234	52.7474	0.966322	1468.82	36.6	0.342275	Pakistan	23.5931	84.7389	136000000	1.16536	3100000	12.3854	0.30483	4.94798	0.25832	0.37288	0.32609	0.31898	0.12989	Pakistan	159	0.25832	0.37288	0.32609	0.31898	0.12989	4.94798	0.30483	12.3854	84.7389	3100000	1.16536	56558.9
30	2017	0.947614	69.3946	29.9695	PAK	-0.85063	0.723571	0.0107543	0	0	1	0	0	0	-2444000000	36.442	53.2493	0.985196	1567.64	33.85	0.316945	Pakistan	24.2954		145000000	1.07127	2940000	13.78	0.19537	4.68573	0.30746	0.43644	0.437345	0.34359	0.141395								4.68573	0.19537	13.78		2940000	1.07127	57840.2
30	2018	1.04466	69.3946	29.9695	PAK	-0.741331	0.549571	0.0183451	0	0	1	0	0	0	-1758000000	36.666	52.9323	1.00601	1620.74	44.0002	0.405225	Pakistan	24.9888		154000000	0.984082	2930000	15.34	0.15704	3.92504	0.3566	0.5	0.5486	0.3682	0.1529	Pakistan	148	0.3566	0.5	0.5486	0.3682	0.1529	3.92504	0.15704	15.34		2930000	0.984082	59121.6
30	2019	0.982903	69.3946	29.9695	PAK	-0.649728	0.422146	0.026259	0	0	1	0	0	0	-2319000000	36.907	53.6205	0.977317	1437.17	41.84	0.37706	Pakistan	24.3315		165000000	0.911153	2780000	17.0709	0.07062	4.75267	0.38745	0.5119	0.589	0.375	0.1983								4.75267	0.07062	17.0709		2780000	0.911153	59034.3
30	2020	1.00118	69.3946	29.9695	PAK	-0.528434	0.279243	0.0389157	0	0	1	0	0	0	-2102000000	37.165	53.6803	1.02165	1322.32	44.133	0.391507	Pakistan	24.6569		176000000	1.07525	2880000	18.9348	0.09162	6.50258	0.4183	0.5238	0.6294	0.3818	0.2437	Pakistan	153	0.4183	0.5238	0.6294	0.3818	0.2437	6.50258	0.09162	18.9348		2880000	1.07525	60343.4
30	2021	1.11379	69.3946	29.9695	PAK	-0.483011	0.2333	0.0442942	0	0	1	0	0	0	-1860000000	37.44	52.1098	1.01384	1505.01	46.0027	0.408204	Pakistan	25.1796		189000000	1.27442	2990000	21.0372	0.08436	5.53074	0.44915	0.5357	0.6698	0.3886	0.2891								5.53074	0.08436	21.0372		2990000	1.27442	61652.5
31	2006	2.67841	122.868	11.7392	PHL	1.57215	2.47166	0.651725	1	0	0	0	0	0	-1639102233	45.625	53.1762	0.734861	1452.22	20.359	0.203117	Philippines	15.8492		42900000	0.301507	3630000	5.74059	47.7607	44.1833	0.548107	0.408367	0.665433	0.889237	0.0895533								44.1833	47.7607	5.74059		3630000	0.301507	32635.4
31	2007	1.07533	122.868	11.7392	PHL	1.18056	1.39371	0.481043	1	0	0	0	0	0	2453941126	45.54	53.3926	0.724049	1741.6	18.752	0.186327	Philippines	15.8933		57300000	0.553979	3940000	5.97	33.7083	42.6774	0.524103	0.340543	0.588567	0.888473	0.0950667								42.6774	33.7083	5.97		3940000	0.553979	33559.8
31	2008	0.971165	122.868	11.7392	PHL	0.794068	0.630544	0.337949	1	0	0	0	0	0	630006878	45.455	52.7186	0.715047	1990.36	20.5291	0.20333	Philippines	15.7952		68100000	1.14596	4080000	6.22	30.5893	33.7032	0.5001	0.27272	0.5117	0.88771	0.10058	Philippines	66	0.5001	0.27272	0.5117	0.88771	0.10058	33.7032	30.5893	6.22		4080000	1.14596	34088.5
31	2009	0.972153	122.868	11.7392	PHL	0.84798	0.719071	0.356398	1	0	0	0	0	0	-1.67491e+08	45.371	53.9372	0.696906	1893.28	20.1377	0.1972	Philippines	15.3956		75600000	1.85311	4100000	9	36.4155	33.1988	0.481915	0.229215	0.452675	0.88792	0.106055								33.1988	36.4155	9		4100000	1.85311	35062.4
31	2010	1.02159	122.868	11.7392	PHL	0.601041	0.361251	0.275917	1	0	0	0	0	0	1641779592	45.332	53.9116	0.691333	2201.78	17.791	0.174369	Philippines	15.5394		83200000	1.85609	3340000	25	26.7658	31.6343	0.46373	0.18571	0.39365	0.88813	0.11153	Philippines	78	0.46373	0.18571	0.39365	0.88813	0.11153	31.6343	26.7658	25		3340000		36034.6
31	2011	0.959172	122.868	11.7392	PHL	0.0750883	0.00563825	0.138784	1	0	0	0	0	0	3.4249e+08	45.522	54.5656	0.662875	2431.2	19.8	0.193229	Philippines	15.3601		94200000	1.85908	3560000	29	22.7404	13.1605	0.48838	0.198105	0.44519	0.861135	0.159875								13.1605	22.7404	29		3560000	1.85908	37192
31	2012	1.01153	122.868	11.7392	PHL	0.597372	0.356854	0.274799	1	0	0	0	0	0	9.57805e+08	45.712	55.5047	0.637217	2671.78	20.714	0.197301	Philippines	15.2741		102000000	2.18969	3490000	30.8	29.4749	24.7504	0.51303	0.2105	0.49673	0.83414	0.20822	Philippines	88	0.51303	0.2105	0.49673	0.83414	0.20822	24.7504	29.4749	30.8		3490000	2.18969	37600.2
31	2013	1.02361	122.868	11.7392	PHL	0.529239	0.280093	0.254446	1	0	0	0	0	0	-9.04224e+07	45.903	56.7511	0.649131	2847.57	19.876	0.189742	Philippines	15.5752		103000000	2.58054	3150000	32.7	26.9174	23.0121	0.49492	0.38956	0.48852	0.76962	0.22665								23.0121	26.9174	32.7		3150000	2.58054	38117.7
31	2014	0.997104	122.868	11.7392	PHL	0.650872	0.423635	0.291329	1	0	0	0	0	0	1014348569	46.093	56.6809	0.658689	2935.93	19.793	0.188391	Philippines	15.9349		111000000	2.86207	3090000	34.7	34.6156	20.889	0.47681	0.56862	0.48031	0.7051	0.24508	Philippines	95	0.47681	0.56862	0.48031	0.7051	0.24508	20.889	34.6156	34.7		3090000	2.86207	38093.1
31	2015	0.934801	122.868	11.7392	PHL	1.11438	1.24183	0.454753	1	0	0	0	0	0	-9.96506e+07	46.284	58.5215	0.665285	2974.3	20.952	0.195354	Philippines	16.19		118000000	2.81468	3220000	36.9	42.908	27.4747	0.52668	0.58092	0.57349	0.694495	0.312085								27.4747	42.908	36.9		3220000	2.81468	39143.1
31	2016	0.996204	122.868	11.7392	PHL	1.14003	1.29968	0.464858	1	0	0	0	0	0	-5882813657	46.475	59.509	0.715247	3038.15	22.004	0.203277	Philippines	17.463		120000000	2.84667	3780000	39.2	43.2146	23.9822	0.57655	0.59322	0.66667	0.68389	0.37909	Philippines	71	0.57655	0.59322	0.66667	0.68389	0.37909	23.9822	43.2146	39.2		3780000	2.84667	40998
31	2017	0.90951	122.868	11.7392	PHL	1.02515	1.05094	0.420478	1	0	0	0	0	0	-6951710900	46.682	59.6905	0.740963	3077.44	23.201	0.213873	Philippines	18.2725		120000000	3.18469	4160000	41.6	35.8661	19.7625	0.613875	0.76571	0.774285	0.700495	0.366895								19.7625	35.8661	41.6		4160000	3.18469	40334
31	2018	0.959601	122.868	11.7392	PHL	1.28527	1.65191	0.524149	1	0	0	0	0	0	-5832900584	46.907	59.7861	0.767502	3194.67	23.34	0.212643	Philippines	19.0643		135000000	3.48948	4130000	44.1	38.3168	22.0572	0.6512	0.9382	0.8819	0.7171	0.3547	Philippines	75	0.6512	0.9382	0.8819	0.7171	0.3547	22.0572	38.3168	44.1		4130000	3.48948	41156.5
31	2019	0.96508	122.868	11.7392	PHL	1.45959	2.13041	0.600016	1	0	0	0	0	0	-5320429168	47.149	60.8522	0.767839	3413.85	22.0858	0.196875	Philippines	19.1163		167000000	5.71919	4260000	43.0266	49.0182	20.9388	0.6702	0.8441	0.80565	0.73575	0.46925								20.9388	49.0182	43.0266		4260000	5.71919	42428.4
31	2020	0.926829	122.868	11.7392	PHL	1.59876	2.55603	0.66426	1	0	0	0	0	0	-3260102017	47.408	61.4148	0.758268	3224.42	22.328	0.195956	Philippines	18.3004		150000000	7.07416	4730000	47.1119	50.8642	24.5566	0.6892	0.75	0.7294	0.7544	0.5838	Philippines	77	0.6892	0.75	0.7294	0.7544	0.5838	24.5566	50.8642	47.1119		4730000	7.07416	39377.8
31	2021	1.20479	122.868	11.7392	PHL	1.48176	2.1956	0.610028	1	0	0	0	0	0	-10010863729	47.684	61.0452	0.752296	3460.53	22.9332	0.201385	Philippines	18.6839		163000000	8.45074	4580000	52.6757	48.4781	21.7537	0.7082	0.6559	0.65315	0.77305	0.69835								21.7537	48.4781	52.6757		4580000	8.45074	43988.7
32	2006	2.90675	19.4007	52.1241	POL	-0.100074	0.0100149	0.103471	0	0	0	0	0	1	-10670000000	61.341	56.1878	1.39002	9035.41	4.27749	-0.168214	Poland	29.9795	67.7239	36700000	7.55218	11500000	44.58	5.03618	8.64007	0.59594	0.308557	0.520507	0.95865	0.309447								8.64007	5.03618	44.58	67.7239	11500000	7.55218	14593.4
32	2007	1.00462	19.4007	52.1241	POL	-0.0810074	0.00656221	0.107064	0	0	0	0	0	1	-17445000000	61.229	55.5659	1.3997	11254.5	5.45185	-0.137631	Poland	30.7242	73.9674	41400000	10.8354	10500000	48.6	5.66219	7.7294	0.60467	0.267913	0.529483	0.9573	0.328793								7.7294	5.66219	48.6	73.9674	10500000	10.8354	15240.4
32	2008	0.959004	19.4007	52.1241	POL	-0.0236916	0.00056129	0.118234	0	0	0	0	0	1	-9908000000	61.116	55.9839	1.44367	13996	6.63636	-0.105002	Poland	31.8904	77.461	43900000	11.5845	9450000	53.13	6.95291	8.14199	0.6134	0.22727	0.53846	0.95595	0.34814	Poland	33	0.6134	0.22727	0.53846	0.95595	0.34814	8.14199	6.95291	53.13	77.461	9450000	11.5845	15799.4
32	2009	0.987322	19.4007	52.1241	POL	0.0237516	0.00056414	0.127899	0	0	0	0	0	1	-8094000000	61.004	56.6953	1.40827	11526.1	8.72049	-0.0549492	Poland	31.1105	79.3365	44800000	14.5142	8490000	58.97	9.3735	9.29908	0.58581	0.23506	0.46288	0.955555	0.342755								9.29908	9.3735	58.97		8490000	14.5142	15868
32	2010	0.99886	19.4007	52.1241	POL	-0.00709167	5.02917e-05	0.121572	0	0	0	0	0	1	-8879000000	60.892	55.2719	1.34815	12504.3	11.0838	-0.0695331	Poland	30.3029	81.2121	47000000	15.1785	7670000	62.32	9.62582	9.80982	0.55822	0.24285	0.3873	0.95516	0.33737	Poland	45	0.55822	0.24285	0.3873	0.95516	0.33737	9.80982	9.62582	62.32		7670000	15.1785	15472.8
32	2011	1.07254	19.4007	52.1241	POL	-0.0310723	0.000965486	0.116764	0	0	0	0	0	1	-13656000000	60.78	54.1198	1.32373	13776.6	13.2574	-0.0658854	Poland	30.6734	83.0877	50200000	18.0528	6850000	61.95	7.04353	7.33269	0.60118	0.213525	0.46162	0.929755	0.41474								7.33269	7.04353	61.95		6850000	18.0528	15562
32	2012	1.00343	19.4007	52.1241	POL	0.0749986	0.00562479	0.138765	0	0	0	0	0	1	-6031000000	60.654	55.1804	1.2689	13010.9	11.9662	-0.0700643	Poland	30.4155	84.9632	54100000	17.8318	5950000	62.31	7.0373	8.19576	0.64414	0.1842	0.53594	0.90435	0.49211	Poland	47	0.64414	0.1842	0.53594	0.90435	0.49211	8.19576	7.0373	62.31	84.9632	5950000	17.8318	15590.6
32	2013	0.978533	19.4007	52.1241	POL	0.135247	0.0182918	0.152106	0	0	0	0	0	1	-4206000000	60.529	56.6102	1.27284	13558.4	15.0707	-0.0505622	Poland	30.5403		57000000	18.2117	8260000	62.8492	6.7367	8.54445	0.64618	0.337195	0.53962	0.871975	0.526965								8.54445	6.7367	62.8492		8260000	18.2117	15568
32	2014	1.06168	19.4007	52.1241	POL	0.228846	0.0523706	0.174048	0	0	0	0	0	1	-12977000000	60.403	55.5583	1.2625	14182.1	16.8162	-0.0136694	Poland	30.5422		56900000	18.7494	9730000	66.6	7.73766	8.8784	0.64822	0.49019	0.5433	0.8396	0.56182	Poland	42	0.64822	0.49019	0.5433	0.8396	0.56182	8.8784	7.73766	66.6		9730000	18.7494	15861.5
32	2015	1.00014	19.4007	52.1241	POL	0.402257	0.16181	0.218603	0	0	0	0	0	1	-10152000000	60.278	55.0897	1.25482	12560.1	20.6612	0.0140362	Poland	30.5366		54500000	18.8455	9050000	67.997	8.11592	9.79028	0.68465	0.685775	0.6231	0.857125	0.57375								9.79028	8.11592	67.997		9050000	18.8455	16083.2
32	2016	0.958731	19.4007	52.1241	POL	0.518842	0.269197	0.251409	0	0	0	0	0	1	-4398000000	60.178	54.8664	1.28802	12378.8	22.5005	0.024001	Poland	31.4475		53000000	19.0177	8140000	73.3007	7.13982	9.23982	0.72108	0.88136	0.7029	0.87465	0.58568	Poland	36	0.72108	0.88136	0.7029	0.87465	0.58568	9.23982	7.13982	73.3007		8140000	19.0177	16196.1
32	2017	1.04797	19.4007	52.1241	POL	0.609305	0.371253	0.278444	0	0	0	0	0	1	-7836000000	60.105	55.9066	1.28411	13815.6	23.8129	0.0515377	Poland	31.6668		50500000	19.8093	7410000	75.9854	6.91685	9.05542	0.75684	0.88733	0.81675	0.870725	0.58309								9.05542	6.91685	75.9854		7410000	19.8093	16422.2
32	2018	1.1046	19.4007	52.1241	POL	0.689913	0.475979	0.303697	0	0	0	0	0	1	-15285000000	60.058	56.41	1.28089	15504.6	21.3026	0.0359103	Poland	31.8165		48300000	20.3819	6580000	77.5417	6.90749	8.51821	0.7926	0.8933	0.9306	0.8668	0.5805	Poland	33	0.7926	0.8933	0.9306	0.8668	0.5805	8.51821	6.90749	77.5417		6580000	20.3819	16484
32	2019	1.02019	19.4007	52.1241	POL	0.737471	0.543864	0.31911	0	0	0	0	0	1	-11709000000	60.037	56.884	1.29068	15699.9	25.1264	0.093083	Poland	32.133		48400000	20.3617	6040000	80.4359	6.54966	8.34929	0.82285	0.9288	0.8947	0.88345	0.6905								8.34929	6.54966	80.4359		6040000	20.3617	16460.5
32	2020	0.923729	19.4007	52.1241	POL	0.866301	0.750478	0.362779	0	0	0	0	0	1	-12505000000	60.043	57.1643	1.31274	15817	28.2764	0.121855	Poland	31.6823		49400000	21.7788	5780000	83.1849	7.21643	10.1084	0.8531	0.9643	0.8588	0.9001	0.8005	Poland	24	0.8531	0.9643	0.8588	0.9001	0.8005	10.1084	7.21643	83.1849		5780000	21.7788	16441.4
32	2021	1.05901	19.4007	52.1241	POL	0.898241	0.806836	0.374038	0	0	0	0	0	1	-25281000000	60.075	56.9	1.24553	17999.9	30.8983	0.0778924	Poland	30.9338		50600000	22.6573	5310000	85.3749	6.78098	9.33371	0.88335	0.9998	0.8229	0.91675	0.9105								9.33371	6.78098	85.3749		5310000	22.6573	16656.1
33	2006	2.87695	24.9859	45.8432	ROU	-0.353	0.124609	0.0616122	0	0	0	0	0	1	-10505020927	53.305	48.2535	1.42376	5757.5	18.172	0.178975	Romania	30.7071	55.9803	16000000	5.21297	4200000	24.66	2.45335	6.46643	0.5597	0.22679	0.566437	0.888247	0.225667								6.46643	2.45335	24.66	55.9803	4200000	5.21297	9291.2
33	2007	1.00938	24.9859	45.8432	ROU	-0.39038	0.152396	0.0563411	0	0	0	0	0	1	-9437017528	53.436	49.3465	1.43075	8360.17	15.844	0.169383	Romania	31.4057	67.043	20400000	9.41081	4420000	28.3	2.32865	6.33521	0.549	0.13612	0.490573	0.896493	0.262433								6.33521	2.32865	28.3	67.043	4420000	9.41081	9353.33
33	2008	0.926421	24.9859	45.8432	ROU	-0.379106	0.143721	0.057906	0	0	0	0	0	1	-13354821284	53.567	46.6271	1.4306	10435	17.052	0.174493	Romania	31.6017	75.1017	24500000	12.2219	4750000	32.42	4.48367	6.559	0.5383	0.04545	0.41471	0.90474	0.2992	Romania	51	0.5383	0.04545	0.41471	0.90474	0.2992	6.559	4.48367	32.42	75.1017	4750000	12.2219	9369.12
33	2009	0.817636	24.9859	45.8432	ROU	-0.231571	0.0536251	0.080362	0	0	0	0	0	1	-4624155850	53.698	48.3795	1.35873	8548.12	15.399	0.157888	Romania	30.0161	69.4757	25100000	13.7426	4730000	36.6	7.16384	8.27463	0.543105	0.11558	0.41529	0.91367	0.304235								8.27463	7.16384	36.6		4730000	13.7426	9243.48
33	2010	1.01974	24.9859	45.8432	ROU	-0.136751	0.0187009	0.0967322	0	0	0	0	0	1	-2978138616	53.829	45.9851	1.25971	8397.81	20.103	0.216592	Romania	28.3151	63.8496	24400000	14.7557	4500000	39.93	8.39261	9.30135	0.54791	0.18571	0.41587	0.9226	0.30927	Romania	47	0.54791	0.18571	0.41587	0.9226	0.30927	9.30135	8.39261	39.93		4500000	14.7557	8712.83
33	2011	1.23992	24.9859	45.8432	ROU	-0.130978	0.0171552	0.097778	0	0	0	0	0	1	-2313269045	53.96	42.3314	1.2327	9560.18	16.169	0.171551	Romania	28.564	58.2236	23400000	16.2369	4680000	40.01	7.82113	7.9849	0.57693	0.132305	0.4661	0.900445	0.366245								7.9849	7.82113	40.01		4680000	16.2369	8528.15
33	2012	1.01064	24.9859	45.8432	ROU	-0.151985	0.0230994	0.094	0	0	0	0	0	1	-3255018087	53.974	49.4243	1.17676	8930.73	14.805	0.161344	Romania	28.2069	52.5976	22800000	17.5861	4650000	45.88	4.98651	6.7718	0.60595	0.0789	0.51633	0.87829	0.42322	Romania	62	0.60595	0.0789	0.51633	0.87829	0.42322	6.7718	4.98651	45.88	52.5976	4650000	17.5861	8605.05
33	2013	1.00033	24.9859	45.8432	ROU	-0.132453	0.0175437	0.0975103	0	0	0	0	0	1	-3915347492	53.937	50.5507	1.17883	9497.25	19.999	0.202729	Romania	28.2846	53.9635	22900000	18.8885	4720000	49.7645	3.97129	7.06415	0.58455	0.27474	0.478635	0.844145	0.43088								7.06415	3.97129	49.7645		4720000	18.8885	8549.12
33	2014	1.05646	24.9859	45.8432	ROU	-0.103025	0.0106141	0.102921	0	0	0	0	0	1	-3599990318	53.9	50.914	1.19577	10031.3	26.94	0.251173	Romania	28.9279	55.3295	22900000	20.0861	4560000	54.08	3.83255	7.08457	0.56315	0.47058	0.44094	0.81	0.43854	Romania	64	0.56315	0.47058	0.44094	0.81	0.43854	7.08457	3.83255	54.08		4560000	20.0861	8613.75
33	2015	1.04226	24.9859	45.8432	ROU	-0.0656723	0.00431286	0.109998	0	0	0	0	0	1	-3287453782	53.887	52.6021	1.16946	8976.88	25.964	0.239938	Romania	28.4593	56.6954	23100000	21.4112	4270000	55.7632	3.66477	7.27968	0.562145	0.54885	0.44873	0.791805	0.445915								7.27968	3.66477	55.7632		4270000	21.4112	8535.38
33	2016	0.989838	24.9859	45.8432	ROU	-0.0300647	0.000903887	0.116964	0	0	0	0	0	1	-4996271644	53.9	55.1123	1.22385	9404.34	26.726	0.250809	Romania	29.8808	58.0614	22900000	22.4747	4110000	59.504	3.38017	7.34639	0.56114	0.62712	0.45652	0.77361	0.45329	Romania	75	0.56114	0.62712	0.45652	0.77361	0.45329	7.34639	3.38017	59.504		4110000	22.4747	8448.8
33	2017	1.05101	24.9859	45.8432	ROU	0.100013	0.0100026	0.14423	0	0	0	0	0	1	-5566577168	53.936	56.9099	1.22156	10727.9	24.0609	0.23176	Romania	30.1243	59.4274	22400000	24.1374	3890000	63.7473	2.99099	7.10119	0.61412	0.66751	0.55811	0.784005	0.500195								7.10119	2.99099	63.7473		3890000	24.1374	8670.58
33	2018	1.06437	24.9859	45.8432	ROU	0.252248	0.0636292	0.179764	0	0	0	0	0	1	-5840119127	53.998	56.9622	1.20899	12494.5	25.9529	0.246515	Romania	30.0308	60.7933	22600000	25.9584	3660000	70.6813	2.92494	7.13805	0.6671	0.7079	0.6597	0.7944	0.5471	Romania	67	0.6671	0.7079	0.6597	0.7944	0.5471	7.13805	2.92494	70.6813	60.7933	3660000	25.9584	8688.52
33	2019	1.05325	24.9859	45.8432	ROU	0.370983	0.137628	0.210192	0	0	0	0	0	1	-5441572773	54.084	58.4545	1.20791	12958.1	24.5656	0.244797	Romania	30.0725	63.6505	22700000	27.0291	3380000	73.6575	3.2022	7.09444	0.7138	0.7587	0.6916	0.79695	0.65285								7.09444	3.2022	73.6575		3380000	27.0291	8680.33
33	2020	0.953276	24.9859	45.8432	ROU	0.51547	0.265709	0.250428	0	0	0	0	0	1	-3403789383	54.194	59.976	1.23179	13047.4	24.4332	0.241313	Romania	29.7285	66.5077	22600000	29.2393	3030000	78.4553	3.34479	7.6872	0.7605	0.8095	0.7235	0.7995	0.7586	Romania	55	0.7605	0.8095	0.7235	0.7995	0.7586	7.6872	3.34479	78.4553	66.5077	3030000	29.2393	8521.08
33	2021	1.01365	24.9859	45.8432	ROU	0.621535	0.386306	0.282205	0	0	0	0	0	1	-10398707803	54.329	58.1999	1.22358	14858.2	26.1953	0.259143	Romania	30.3885	80.7295	22900000	31.5533	2610000	83.5904	3.03562	7.17382	0.8072	0.8603	0.7554	0.80205	0.86435								7.17382	3.03562	83.5904	80.7295	2610000	31.5533	4970.11
34	2006	3.06747	96.6728	61.9908	RUS	-0.453003	0.205212	0.0480383	0	0	0	0	1	0	-7601620000	73.508	49.7215	1.34046	6920.19	176.561	1.65042	Russia	28.9106		151000000	2.02227	43900000	18.0233	0.25576	8.70283	0.5259	0.125533	0.41404	0.952963	0.21253								8.70283	0.25576	18.0233		43900000	2.02227	68855
34	2007	0.998751	96.6728	61.9908	RUS	-0.454943	0.206973	0.0477917	0	0	0	0	1	0	-11072470000	73.553	50.673	1.32966	9101.25	179.537	1.64468	Russia	29.1867		171000000	3.42021	45200000	24.66	0.22087	8.60392	0.51895	0.108217	0.37424	0.955927	0.23034								8.60392	0.22087	24.66		45200000	3.42021	70572.5
34	2008	0.936684	96.6728	61.9908	RUS	-0.46676	0.217865	0.046303	0	0	0	0	1	0	-19120290000	73.598	50.6957	1.29769	11635.3	167.777	1.51098	Russia	28.6657		200000000	6.47824	45500000	32	0.16748	7.79244	0.512	0.0909	0.33444	0.95889	0.24815	Russian Federation	60	0.512	0.0909	0.33444	0.95889	0.24815	7.79244	0.16748	32		45500000	6.47824	70965.1
34	2009	0.874043	96.6728	61.9908	RUS	-0.428692	0.183777	0.051183	0	0	0	0	1	0	6697430000	73.642	53.7665	1.24473	8562.81	177.294	1.62582	Russia	27.4978		230000000	9.0004	45400000	42.55	0.27751	7.27913	0.512795	0.109735	0.332295	0.949275	0.26233								7.27913	0.27751	42.55		45400000	9.0004	69305.1
34	2010	1.02666	96.6728	61.9908	RUS	-0.360467	0.129937	0.0605403	0	0	0	0	1	0	9448500000	73.687	53.1202	1.23496	10675	169.766	1.52324	Russia	27.7589		238000000	10.9423	44900000	49	0.22338	8.52989	0.51359	0.12857	0.33015	0.93966	0.27651	Russian Federation	59	0.51359	0.12857	0.33015	0.93966	0.27651	8.52989	0.22338	49		44900000	10.9423	69941.7
34	2011	1.06571	96.6728	61.9908	RUS	-0.0674129	0.0045445	0.109663	0	0	0	0	1	0	11767160000	73.732	53.7976	1.18469	14311.1	169.148	1.50075	Russia	27.4517		204000000	12.2717	44200000	58	0.2373	7.15668	0.624035	0.393235	0.49514	0.91232	0.467425								7.15668	0.2373	58		44200000	12.2717	70858.3
34	2012	0.998151	96.6728	61.9908	RUS	0.279702	0.0782331	0.186588	0	0	0	0	1	0	-1765140000	73.791	54.5096	1.16033	15420.9	169.414	1.49292	Russia	27.8131		208000000	14.5307	42200000	66	0.31304	7.49734	0.73448	0.6579	0.66013	0.88498	0.65834	Russian Federation	27	0.73448	0.6579	0.66013	0.88498	0.65834	7.49734	0.31304	66		42200000	14.5307	71541.7
34	2013	0.983377	96.6728	61.9908	RUS	0.285162	0.0813172	0.187961	0	0	0	0	1	0	17287630000	73.863	56.1216	1.15835	15974.6	184.526	1.64591	Russia	27.7933		218000000	16.4526	40500000	67.97	0.41782	6.83956	0.732035	0.672085	0.684395	0.86189	0.64982								6.83956	0.41782	67.97		40500000	16.4526	71391.7
34	2014	0.984502	96.6728	61.9908	RUS	0.33842	0.114528	0.201611	0	0	0	0	1	0	35050840000	73.95	55.6848	1.14084	14095.6	179.081	1.6071	Russia	27.599		221000000	17.2471	38200000	70.52	0.79679	7.88483	0.72959	0.68627	0.70866	0.8388	0.6413	Russian Federation	27	0.72959	0.68627	0.70866	0.8388	0.6413	7.88483	0.79679	70.52		38200000	17.2471	71541.7
34	2015	0.978747	96.6728	61.9908	RUS	0.383019	0.146703	0.21341	0	0	0	0	1	0	15232100000	74.05	56.1425	1.12117	9313.01	171.752	1.49269	Russia	27.2841		227000000	18.5409	35600000	70.0992	0.80555	9.1378	0.72553	0.716015	0.72027	0.8311	0.625215								9.1378	0.80555	70.0992		35600000	18.5409	72316.7
34	2016	1.03799	96.6728	61.9908	RUS	0.371097	0.137713	0.210223	0	0	0	0	1	0	-10224570000	74.164	57.0123	1.10649	8704.9	188.132	1.62419	Russia	27.0155		229000000	18.9452	32300000	73.0914	0.5951	8.40007	0.72147	0.74576	0.73188	0.8234	0.60913	Russian Federation	35	0.72147	0.74576	0.73188	0.8234	0.60913	8.40007	0.5951	73.0914		32300000	18.9452	72391.7
34	2017	1.0484	96.6728	61.9908	RUS	0.509716	0.25981	0.248758	0	0	0	0	1	0	8199590000	74.292	56.0328	1.09361	10720.3	188.824	1.62222	Russia	26.9689		227000000	21.3724	32000000	76.0081	0.62523	8.67164	0.759185	0.83353	0.82429	0.8378	0.615515								8.67164	0.62523	76.0081		32000000	21.3724	72316.7
34	2018	1.00286	96.6728	61.9908	RUS	0.666938	0.444807	0.296388	0	0	0	0	1	0	22592030000	74.433	53.4288	1.07925	11287.4	195.133	1.65787	Russia	26.8079		229000000	22.0009	30100000	80.8647	0.4708	9.9064	0.7969	0.9213	0.9167	0.8522	0.6219	Russian Federation	32	0.7969	0.9213	0.9167	0.8522	0.6219	9.9064	0.4708	80.8647		30100000	22.0009	72533.3
34	2019	1.00724	96.6728	61.9908	RUS	0.662292	0.438631	0.29492	0	0	0	0	1	0	-10051630000	74.587	54.1729	1.07585	11536.3	199.619	1.63585	Russia	26.7846		240000000	22.5249	27700000	82.6422	0.5299	9.35658	0.81065	0.89515	0.86715	0.86775	0.6971								9.35658	0.5299	82.6422		27700000	22.5249	71941.7
34	2020	0.975362	96.6728	61.9908	RUS	0.701494	0.492094	0.307415	0	0	0	0	1	0	-3631810000	74.754	56.0937	1.09797	10169.1	219.214	1.81823	Russia	26.4989		239000000	23.225	25900000	84.9947	0.50812	10.3662	0.8244	0.869	0.8176	0.8833	0.7723	Russian Federation	36	0.8244	0.869	0.8176	0.8833	0.7723	10.3662	0.50812	84.9947		25900000	23.225	70600
34	2021	1.04119	96.6728	61.9908	RUS	0.704502	0.496323	0.308384	0	0	0	0	1	0	25432780000	74.934	52.9099	1.08208	12194.8	224.901	1.83585	Russia	26.8742		247000000	23.7286	23900000	88.2138	0.52072	9.99028	0.83815	0.84285	0.76805	0.89885	0.8475								9.99028	0.52072	88.2138		23900000	23.7286	71716.7
35	2006	3.05262	44.5843	24.0177	SAU	-0.67878	0.460742	0.0235958	0	1	0	0	0	0	-18331733333	81.204	34.6384	1.10665	14848.6	0	0	Saudi Arabia	23.8679		19700000	0.85954	3950000	19.4596	0.07496	7.00282	0.43816	0.148387	0.40624	0.741867	0.166693								7.00282	0.07496	19.4596		3950000	0.85954	7523
35	2007	0.858299	44.5843	24.0177	SAU	-0.570312	0.325255	0.0342654	0	1	0	0	0	0	-24453386667	81.427	34.6108	1.08481	15756.2	0	0	Saudi Arabia	23.8122		28400000	2.36028	4000000	30	0.07788	6.83078	0.46583	0.233283	0.43556	0.773733	0.188847								6.83078	0.07788	30		4000000	2.36028	7755.4
35	2008	0.865697	44.5843	24.0177	SAU	-0.479215	0.229647	0.0447595	0	1	0	0	0	0	-35958243929	81.649	31.1258	1.07372	18944.9	0	0	Saudi Arabia	23.7182		36000000	3.81997	4100000	36	0.08119	6.47497	0.4935	0.31818	0.46488	0.8056	0.211	Saudi Arabia	70	0.4935	0.31818	0.46488	0.8056	0.211	6.47497	0.08119	36		4100000	3.81997	7987.1
35	2009	0.871403	44.5843	24.0177	SAU	-0.468907	0.219874	0.0460351	0	1	0	0	0	0	-34280396667	81.867	42.5239	1.06604	15064.6	0	0	Saudi Arabia	23.5502		44900000	5.04749	4170000	38	0.1845	7.49438	0.50387	0.20909	0.387995	0.820115	0.307065								7.49438	0.1845	38		4170000	5.04749	8147.99
35	2010	0.980223	44.5843	24.0177	SAU	-0.494713	0.244741	0.0428753	0	1	0	0	0	0	-25325858000	82.084	39.2243	1.04557	17958.9	0	-6.824e-06	Saudi Arabia	23.5017		51600000	5.8194	4170000	41	0.11212	7.34624	0.51424	0.1	0.31111	0.83463	0.40313	Saudi Arabia	58	0.51424	0.1	0.31111	0.83463	0.40313	7.34624	0.11212	41		4170000	5.8194	9041.76
35	2011	1.06151	44.5843	24.0177	SAU	-0.185329	0.034347	0.0881559	0	1	0	0	0	0	-12878361333	82.302	34.2631	1.02117	22262.6	0	-0.000235428	Saudi Arabia	23.6626		54000000	6.47229	4630000	47.5	0.11002	8.18126	0.590025	0.3658	0.554245	0.801185	0.417725								8.18126	0.11002	47.5		4630000	6.47229	9935.53
35	2012	0.955384	44.5843	24.0177	SAU	0.0852383	0.00726556	0.140989	0	1	0	0	0	0	-7780825000	82.52	35.1997	0.988056	23878.6	0.026	6.41916e-05	Saudi Arabia	23.6837		53000000	8.24148	4800000	54	0.12343	7.43705	0.66581	0.6316	0.79738	0.76774	0.43232	Saudi Arabia	41	0.66581	0.6316	0.79738	0.76774	0.43232	7.43705	0.12343	54		4800000	8.24148	10390.3
35	2013	0.948731	44.5843	24.0177	SAU	0.131734	0.017354	0.151312	0	1	0	0	0	0	-3921400000	82.74	37.9817	0.988625	23716.3	0.042	0.000236946	Saudi Arabia	23.721		53100000	11.9428	4940000	60.5	0.21852	7.428	0.67791	0.60011	0.784515	0.75692	0.492295								7.428	0.21852	60.5		4940000		10729.1
35	2014	0.988088	44.5843	24.0177	SAU	0.168534	0.0284036	0.15974	0	1	0	0	0	0	-2615796667	82.96	40.531	0.984977	23543.6	0.046	0.000265836	Saudi Arabia	23.8284		52700000	15.644	4345000	64.7137	0.11574	7.44534	0.69001	0.56862	0.77165	0.7461	0.55227	Saudi Arabia	36	0.69001	0.56862	0.77165	0.7461	0.55227	7.44534	0.11574	64.7137				11067.7
35	2015	1.00894	44.5843	24.0177	SAU	0.202949	0.0411883	0.167829	0	1	0	0	0	0	-2751098333	83.18	51.9483	0.976794	19977.8	0.046	0.000255686	Saudi Arabia	23.7707		52800000	19.3453	3750000	69.6162	0.16037	7.47842	0.686125	0.64024	0.72278	0.77278	0.562805								7.47842	0.16037	69.6162		3750000	19.3453	11484.7
35	2016	0.949733	44.5843	24.0177	SAU	0.190252	0.0361958	0.164821	0	1	0	0	0	0	1483622000	83.401	54.0171	1.05186	19300.1	0.046	-0.00202924	Saudi Arabia	25.6817	61.575	47900000	19.145	4240000	74.8793	0.22463	6.48296	0.68224	0.71186	0.67391	0.79946	0.57334	Saudi Arabia	44	0.68224	0.71186	0.67391	0.79946	0.57334	6.48296	0.22463	74.8793	61.575	4240000	19.145	11431.2
35	2017	1.03413	44.5843	24.0177	SAU	0.313815	0.0984799	0.195245	0	1	0	0	0	0	5860755582	83.622	51.6026	1.06848	20138.1	0.0698	0.00052433	Saudi Arabia	26.3492	94.3	40200000	19.458	4660000	94.1756	0.1472	7.69832	0.69707	0.71268	0.732805	0.80478	0.55362								7.69832	0.1472	94.1756	94.3	4660000	19.458	11568.2
35	2018	1.09147	44.5843	24.0177	SAU	0.345223	0.119179	0.203389	0	1	0	0	0	0	15005221032	83.844	45.7158	1.03285	23318.7	0.2188	0.00187595	Saudi Arabia	25.6555	97.465	41300000	19.481	5390000	93.31	0.09222	7.51893	0.7119	0.7135	0.7917	0.8101	0.5339	Saudi Arabia	52	0.7119	0.7135	0.7917	0.8101	0.5339	7.51893	0.09222	93.31	97.465	5390000	19.481	11744.7
35	2019	0.991899	44.5843	24.0177	SAU	0.41953	0.176006	0.223319	0	1	0	0	0	0	8984491912	84.065	48.4871	0.97388	22430.2	0.326	0.00394028	Saudi Arabia	24.2459	99.1587	41300000	18.9853	5380000	95.7247	0.00159	7.9547	0.7555	0.7139	0.73995	0.83745	0.68905								7.9547	0.00159	95.7247	99.1587	5380000	18.9853	12041.1
35	2020	0.98808	44.5843	24.0177	SAU	0.506269	0.256308	0.247761	0	1	0	0	0	0	-4.88234e+08	84.287	53.9033	0.948742	19539.6	0.785	0.00563119	Saudi Arabia	22.8974	99.3933	43200000	21.9192	5750000	97.8623	0.27511	7.96719	0.7991	0.7143	0.6882	0.8648	0.8442	Saudi Arabia	43	0.7991	0.7143	0.6882	0.8648	0.8442	7.96719	0.27511	97.8623	99.3933	5750000	21.9192	10936.5
35	2021	1.08789	44.5843	24.0177	SAU	0.599175	0.35901	0.275348	0	1	0	0	0	0	4574270760	84.508	46.6937	0.805875	23185.9	0.95638	0.0073609	Saudi Arabia	20.0145	100	45400000	29.4521	6590000	100	0.40451	7.451	0.8427	0.7147	0.63645	0.89215	0.99935								7.451	0.40451	100	100	6590000	29.4521	9831.94
36	2006	2.55538	103.82	1.36113	SGP	0.832377	0.692851	0.351008	1	0	0	0	0	0	-19066249895	100	64.8769	1.0707	33769.2	0.954	0.00966039	Singapore	23.0924		4790000	17.5612	1850000	59	14.4564	11.2606	0.8005	0.8682	0.868113	0.90933	0.62496								11.2606	14.4564	59		1850000	17.5612	2426.68
36	2007	1.04445	103.82	1.36113	SGP	1.60182	2.56584	0.665712	1	0	0	0	0	0	-6455702502	100	66.0401	1.06562	39432.9	0.974	0.00971771	Singapore	23.3909		5920000	19.8574	1860000	69.9	34.1398	28.8614	0.7507	0.75228	0.740077	0.90866	0.60515								28.8614	34.1398	69.9		1860000	19.8574	2638.53
36	2008	0.88568	103.82	1.36113	SGP	1.40069	1.96194	0.57381	1	0	0	0	0	0	-5633910991	100	68.348	1.06527	40007.5	1.049	0.010517	Singapore	23.5315		6410000	22.1395	1880000	69	34.2413	26.5795	0.7009	0.63636	0.61204	0.90799	0.58534	Singapore	23	0.7009	0.63636	0.61204	0.90799	0.58534	26.5795	34.2413	69		1880000	22.1395	2890.75
36	2009	0.90149	103.82	1.36113	SGP	1.45677	2.12218	0.598747	1	0	0	0	0	0	8603556832	100	68.0061	1.11792	38927.2	1.161	0.0114928	Singapore	24.6964	86.9031	6880000	24.6173	1930000	69	33.6208	26.5944	0.72425	0.661035	0.648875	0.91416	0.611985								26.5944	33.6208	69	86.9031	1930000	24.6173	2958.47
36	2010	1.06755	103.82	1.36113	SGP	1.55948	2.43199	0.645798	1	0	0	0	0	0	-19915243153	100	67.8435	1.05024	47237	1.522	0.0151537	Singapore	23.6066	86.3119	7380000	25.92	2000000	71	34.0829	27.5449	0.7476	0.68571	0.68571	0.92033	0.63863	Singapore	11	0.7476	0.68571	0.68571	0.92033	0.63863	27.5449	34.0829	71		2000000	25.92	3063.32
36	2011	1.00267	103.82	1.36113	SGP	1.48676	2.21045	0.6123	1	0	0	0	0	0	-17255458936	100	69.0231	0.889163	53890.4	1.554	0.0152044	Singapore	20.6037	85.7207	7790000	26.6637	2020000	71	28.3278	23.0399	0.79751	0.816555	0.842855	0.885145	0.66546								23.0399	28.3278	71		2020000	26.6637	3178.2
36	2012	0.996222	103.82	1.36113	SGP	1.64299	2.69941	0.685362	1	0	0	0	0	0	-34830382359	100	69.2086	0.844615	55546.5	1.588	0.0151128	Singapore	20.2455	85.1296	8070000	26.627	1990000	72	27.9069	23.0398	0.84742	0.9474	1	0.84996	0.69229	Singapore	10	0.84742	0.9474	1	0.84996	0.69229	23.0398	27.9069	72		1990000	26.627	3303.57
36	2013	0.993132	103.82	1.36113	SGP	1.76332	3.10931	0.744445	1	0	0	0	0	0	-19110684888	100	70.7623	0.815068	56967.4	1.852	0.0176721	Singapore	19.5567	84.5384	8440000	27.2615	1970000	80.9021	29.2457	23.9035	0.87752	0.92468	0.99606	0.85073	0.78578								23.9035	29.2457	80.9021		1970000	27.2615	3438.45
36	2014	0.986938	103.82	1.36113	SGP	1.80653	3.26353	0.766253	1	0	0	0	0	0	-16220985754	100	70.3453	0.720684	57562.5	1.903	0.0181065	Singapore	17.4346	83.9472	8100000	26.4608	2000000	82.1	29.5433	23.7256	0.90762	0.90196	0.99212	0.8515	0.87927	Singapore	3	0.90762	0.90196	0.99212	0.8515	0.87927	23.7256	29.5433	82.1	83.9472	2000000	26.4608	3569.82
36	2015	0.990548	103.82	1.36113	SGP	1.93447	3.74216	0.832681	1	0	0	0	0	0	-24551342898	100	69.9509	0.702232	55646.6	1.928	0.0179705	Singapore	17.0891	85.5656	8230000	26.3043	2020000	83.2	32.4009	26.9787	0.89521	0.908605	0.981565	0.84374	0.86034								26.9787	32.4009	83.2		2020000	26.3043	3628.62
36	2016	0.999638	103.82	1.36113	SGP	1.96382	3.8566	0.848313	1	0	0	0	0	0	-28490466217	100	70.6637	0.650527	56860.4	2.015	0.0186108	Singapore	15.8829	87.1841	8460000	27.8697	2000000	84.4523	32.8022	28.0978	0.8828	0.91525	0.97101	0.83598	0.84141	Singapore	4	0.8828	0.91525	0.97101	0.83598	0.84141	28.0978	32.8022	84.4523		2000000	27.8697	3671.6
36	2017	1.03671	103.82	1.36113	SGP	1.93828	3.75691	0.834701	1	0	0	0	0	0	-36503792748	100	70.3471	0.632791	61150.7	1.993	0.0184124	Singapore	15.605	88.8025	8380000	25.5998	1990000	84.4523	32.0211	27.8802	0.882	0.940775	0.978555	0.84584	0.821655								27.8802	32.0211	84.4523	88.8025	1990000	25.5998	3550.1
36	2018	1.02097	103.82	1.36113	SGP	1.87241	3.50591	0.800114	1	0	0	0	0	0	-59011967058	100	69.3554	0.633889	66859.3	2.138	0.0195625	Singapore	15.7454		8570000	25.6873	2000000	88.1656	29.5657	26.6106	0.8812	0.9663	0.9861	0.8557	0.8019	Singapore	7	0.8812	0.9663	0.9861	0.8557	0.8019	26.6106	29.5657	88.1656		2000000	25.6873	3428.6
36	2019	1.02508	103.82	1.36113	SGP	1.90287	3.62092	0.81602	1	0	0	0	0	0	-55872619869	100	70.7942	0.590989	65831.2	2.284	0.0204757	Singapore	14.7134		9030000	25.6375	1910000	88.9493	29.2985	26.8739	0.8981	0.97125	0.9754	0.87305	0.8459								26.8739	29.2985	88.9493		1910000	25.6375	3307.1
36	2020	1.00019	103.82	1.36113	SGP	2.19026	4.79725	0.973771	1	0	0	0	0	0	-42992685829	100	71.6644	0.603842	60729.5	2.319	0.0204096	Singapore	14.5734		8440000	25.5454	1890000	92.0043	33.6977	32.8509	0.915	0.9762	0.9647	0.8904	0.8899	Singapore	11	0.915	0.9762	0.9647	0.8904	0.8899	32.8509	33.6977	92.0043		1890000	25.5454	3185.6
36	2021	1.12591	103.82	1.36113	SGP	2.23572	4.99845	1	1	0	0	0	0	0	-58095473210	100	69.4488	0.580559	72794	2.501	0.0221103	Singapore	14.4186		8760000	25.6924	1900000	91.0994	34.7142	32.8769	0.9319	0.98115	0.954	0.90775	0.9339								32.8769	34.7142	91.0994		1900000	25.6924	3064.1
37	2006	3.03812	19.487	48.7066	SVK	0.0162478	0.00026399	0.126345	0	0	0	0	0	1	-5202385157	55.412	53.4056	1.79988	13170.8	4.784	0.0494844	Slovakia	38.8191	87.0362	4890000	5.6649	1170000	56.08	12.6355	9.26951	0.588747	0.139127	0.517277	0.9137	0.336423								9.26951	12.6355	56.08	87.0362	1170000	5.6649	2302.74
37	2007	1.03897	19.487	48.7066	SVK	0.182072	0.0331501	0.162898	0	0	0	0	0	1	-3414699100	55.261	53.7166	1.79402	16106.1	4.913	0.062705	Slovakia	39.3796	91.1975	6070000	10.1641	1310000	61.8	14.567	13.0177	0.588823	0.103653	0.496093	0.9174	0.355287								13.0177	14.567	61.8	91.1975	1310000	10.1641	2357.92
37	2008	0.995831	19.487	48.7066	SVK	0.244731	0.0598934	0.177918	0	0	0	0	0	1	-4117039837	55.111	54.5298	1.81654	18753.6	4.542	0.0524199	Slovakia	40.127	93.694	5520000	11.2361	1290000	66.05	16.8444	13.6173	0.5889	0.06818	0.47491	0.9211	0.37415	Slovakia	38	0.5889	0.06818	0.47491	0.9211	0.37415	13.6173	16.8444	66.05	93.694	1290000	11.2361	2434.05
37	2009	0.925905	19.487	48.7066	SVK	0.369923	0.136843	0.20991	0	0	0	0	0	1	9.72627e+08	54.96	58.958	1.71682	16597.2	4.8832	0.0547633	Slovakia	37.9268	93.5489	5500000	14.3824	1220000	70	20.8345	15.6433	0.576385	0.0698	0.41047	0.92605	0.397665								15.6433	20.8345	70		1220000	14.3824	2367.01
37	2010	1.13231	19.487	48.7066	SVK	0.324395	0.105232	0.19797	0	0	0	0	0	1	-876088380	54.685	58.4565	1.65126	16908.8	5.893	0.0680558	Slovakia	37.1162	93.4037	5930000	16.2506	1100000	75.71	19.0482	15.665	0.56387	0.07142	0.34603	0.931	0.42118	Slovakia	43	0.56387	0.07142	0.34603	0.931	0.42118	15.665	19.0482	75.71		1100000	16.2506	2318.59
37	2011	1.1272	19.487	48.7066	SVK	0.277715	0.0771259	0.18609	0	0	0	0	0	1	-2733621386	54.42	57.7075	1.61789	18509.7	4.458	0.0533363	Slovakia	37.4897	93.2586	5980000	17.6412	1060000	74.44	16.0803	12.9538	0.596525	0.10151	0.424645	0.900285	0.46794								12.9538	16.0803	74.44		1060000	17.6412	2315.64
37	2012	0.931801	19.487	48.7066	SVK	0.38659	0.149452	0.214369	0	0	0	0	0	1	-3008780999	54.28	58.1683	1.56595	17498.4	5.083	0.0542959	Slovakia	37.5358	93.1134	6090000	19.3277	974762	76.71	16.7034	12.9075	0.62918	0.1316	0.50326	0.86957	0.5147	Slovakia	53	0.62918	0.1316	0.50326	0.86957	0.5147	12.9075	16.7034	76.71	93.1134	974762	19.3277	2329.07
37	2013	0.996121	19.487	48.7066	SVK	0.51439	0.264597	0.250114	0	0	0	0	0	1	2.7282e+08	54.14	59.6112	1.49304	18276	5.858	0.0588125	Slovakia	35.8239		6210000	20.4822	967106	77.8826	17.582	14.3956	0.62198	0.379525	0.49572	0.848035	0.522165								14.3956	17.582	77.8826		967106	20.4822	2329.56
37	2014	1.1261	19.487	48.7066	SVK	0.594119	0.352978	0.273809	0	0	0	0	0	1	6.42121e+08	54	57.0196	1.46515	18720	5.807	0.063755	Slovakia	35.4445		6380000	21.9799	918662	79.98	17.6713	14.5698	0.61478	0.62745	0.48818	0.8265	0.52963	Slovakia	51	0.61478	0.62745	0.48818	0.8265	0.52963	14.5698	17.6713	79.98		918662	21.9799	2363.36
37	2015	1.04254	19.487	48.7066	SVK	0.55021	0.302731	0.260627	0	0	0	0	0	1	-1.02095e+08	53.889	57.2712	1.48391	16390.9	5.901	0.0682868	Slovakia	36.1116		6680000	23.4828	866630	77.6347	16.6668	14.9461	0.60316	0.58491	0.465105	0.804365	0.539995								14.9461	16.6668	77.6347		866630	23.4828	2424.89
37	2016	0.90916	19.487	48.7066	SVK	0.505804	0.255838	0.247626	0	0	0	0	0	1	-6.69238e+08	53.806	58.5354	1.49369	16563.4	6.594	0.0736621	Slovakia	36.469		6990000	24.6086	823594	80.4759	16.5535	14.2665	0.59154	0.54237	0.44203	0.78223	0.55036	Slovakia	67	0.59154	0.54237	0.44203	0.78223	0.55036	14.2665	16.5535	80.4759		823594	24.6086	2492.86
37	2017	0.982537	19.487	48.7066	SVK	0.717655	0.515029	0.312641	0	0	0	0	0	1	-2726796237	53.751	58.7829	1.50696	17585.2	6.554	0.0774395	Slovakia	37.1625		7120000	25.8414	758842	81.6257	16.5481	15.1424	0.65352	0.675685	0.589065	0.798165	0.57338								15.1424	16.5481	81.6257		758842	25.8414	2531.28
37	2018	1.10097	19.487	48.7066	SVK	0.81938	0.671383	0.34655	0	0	0	0	0	1	-1292870176	53.726	58.1393	1.47006	19486.4	5.739	0.0729298	Slovakia	36.5156		7240000	27.6775	722704	80.4489	14.3242	13.7419	0.7155	0.809	0.7361	0.8141	0.5964	Slovakia	49	0.7155	0.809	0.7361	0.8141	0.5964	13.7419	14.3242	80.4489		722704	27.6775	2567.72
37	2019	1.0329	19.487	48.7066	SVK	0.834838	0.696955	0.351856	0	0	0	0	0	1	-2450723016	53.729	57.9414	1.44978	19383.5	6.58983	0.0708581	Slovakia	36.0942		7400000	29.1635	675297	82.8537	13.2818	13.1762	0.7486	0.7557	0.72685	0.82135	0.6976								13.1762	13.2818	82.8537		675297	29.1635	2583.5
37	2020	0.931864	19.487	48.7066	SVK	0.894844	0.800746	0.372833	0	0	0	0	0	1	2766594281	53.76	59.7571	1.51443	19545.7	6.733	0.064751	Slovakia	36.55		7290000	31.1831	648462	89.9209	12.9188	13.1926	0.7817	0.7024	0.7176	0.8286	0.7988	Slovakia	48	0.7817	0.7024	0.7176	0.8286	0.7988	13.1926	12.9188	89.9209		648462	31.1831	2529.94
37	2021	1.01037	19.487	48.7066	SVK	0.899067	0.808322	0.374332	0	0	0	0	0	1	3.33502e+08	53.82	59.1368	1.47704	21391.9	6.70238	0.0658734	Slovakia	36.6835		7360000	32.577	577390	88.9256	12.0101	12.47	0.8148	0.6491	0.70835	0.83585	0.9								12.47	12.0101	88.9256		577390	32.577	2554.84
38	2006	2.27219	14.8229	46.1116	SVN	-0.12961	0.0167989	0.0980265	0	0	0	0	0	1	2.14496e+08	51.758	55.6182	1.6453	19673	3.672	0.0380565	Slovenia	35.4852	85.4461	1820000	13.8964	1030000	54.01	1.38699	4.3217	0.673467	0.223903	0.56209	0.966277	0.493733								4.3217	1.38699	54.01	85.4461	1030000	13.8964	961.209
38	2007	1.04145	14.8229	46.1116	SVN	-0.126152	0.0159143	0.0986564	0	0	0	0	0	1	3.31327e+08	51.983	54.9132	1.60551	23817.9	3.351	0.0353625	Slovenia	35.2419	88.3659	1930000	17.036	1010000	56.74	1.44687	3.97037	0.670783	0.225587	0.53188	0.972553	0.511297								3.97037	1.44687	56.74	88.3659	1010000	17.036	985.163
38	2008	0.935032	14.8229	46.1116	SVN	-0.0932702	0.00869932	0.104746	0	0	0	0	0	1	2.51497e+08	52.209	55.9348	1.58975	27595.6	4.271	0.0376436	Slovenia	35.1172	89.3121	2050000	20.9089	978267	58	2.11394	4.25095	0.6681	0.22727	0.50167	0.97883	0.52886	Slovenia	26	0.6681	0.22727	0.50167	0.97883	0.52886	4.25095	2.11394	58	89.3121	978267	20.9089	996.1
38	2009	0.907872	14.8229	46.1116	SVN	-0.061645	0.0038001	0.110775	0	0	0	0	0	1	6.86975e+08	52.433	58.3163	1.501	24792.1	4.862	0.0377606	Slovenia	33.1591	90.543	2100000	21.9513	939107	64	2.32007	4.72549	0.64618	0.370775	0.450835	0.977915	0.515725								4.72549	2.32007	64		939107	21.9513	980.66
38	2010	1.06338	14.8229	46.1116	SVN	-0.0524403	0.00274998	0.112562	0	0	0	0	0	1	-1.19593e+08	52.658	58.7565	1.44952	23532.5	4.68786	0.0393653	Slovenia	32.5816	91.774	2120000	22.8712	910833	70	2.1781	4.66466	0.62426	0.51428	0.4	0.977	0.50259	Slovenia	29	0.62426	0.51428	0.4	0.977	0.50259	4.66466	2.1781	70		910833	22.8712	966.042
38	2011	1.16971	14.8229	46.1116	SVN	0.0145994	0.000213142	0.126005	0	0	0	0	0	1	-8.89967e+08	52.883	58.1154	1.36626	25128	3.832	0.033474	Slovenia	31.6589	93.0049	2170000	23.9353	881239	67.34	1.92352	3.96599	0.686735	0.36239	0.53333	0.953515	0.57676								3.96599	1.92352	67.34		881239	23.9353	936.131
38	2012	1.04739	14.8229	46.1116	SVN	0.100323	0.0100647	0.144298	0	0	0	0	0	1	-5.99752e+08	53.108	57.4621	1.29203	22641.8	4.27581	0.0380373	Slovenia	30.9699	94.2358	2240000	24.6133	835255	68.35	1.79163	3.57443	0.74921	0.2105	0.66666	0.93003	0.65093	Slovenia	25	0.74921	0.2105	0.66666	0.93003	0.65093	3.57443	1.79163	68.35	94.2358	835255	24.6133	923.771
38	2013	1.08073	14.8229	46.1116	SVN	0.0195511	0.000382246	0.127028	0	0	0	0	0	1	-7.19377e+07	53.332	56.9734	1.2933	23503.3	5.05029	0.0447069	Slovenia	31.0314	94.8791	2280000	25.315	798356	72.6756	1.66843	3.27666	0.699875	0.301325	0.545925	0.918615	0.63509								3.27666	1.66843	72.6756		798356	25.315	905.895
38	2014	1.14652	14.8229	46.1116	SVN	-0.0434048	0.00188398	0.11433	0	0	0	0	0	1	-8.06715e+08	53.557	56.2885	1.2786	24247.2	6.53703	0.0537676	Slovenia	30.9316	95.5224	2330000	26.7873	769682	71.59	1.88106	3.74814	0.65054	0.39215	0.42519	0.9072	0.61925	Slovenia	41	0.65054	0.39215	0.42519	0.9072	0.61925	3.74814	1.88106	71.59		769682	26.7873	916.701
38	2015	1.04633	14.8229	46.1116	SVN	0.181319	0.0328766	0.162722	0	0	0	0	0	1	-1404352738	53.781	56.336	1.31525	20890.2	4.30526	0.0408849	Slovenia	32.0071	96.1657	2350000	27.3457	753082	73.0987	2.015	4.0454	0.713725	0.56048	0.63651	0.901185	0.603495								4.0454	2.015	73.0987		753082	27.3457	917.446
38	2016	1.03335	14.8229	46.1116	SVN	0.39116	0.153006	0.2156	0	0	0	0	0	1	-9.68693e+08	54.02	56.6684	1.35869	21678.4	5.00225	0.0430064	Slovenia	33.1729	96.809	2390000	28.1971	728686	75.4985	1.80706	3.9129	0.77691	0.72881	0.84783	0.89517	0.58774	Slovenia	21	0.77691	0.72881	0.84783	0.89517	0.58774	3.9129	1.80706	75.4985		728686	28.1971	915.008
38	2017	1.1156	14.8229	46.1116	SVN	0.403568	0.162867	0.218959	0	0	0	0	0	1	-5.65156e+08	54.273	56.7018	1.34831	23514	4.39739	0.0397521	Slovenia	33.2501	97.4523	2440000	28.6801	739087	78.8854	1.82532	3.86089	0.774155	0.771705	0.823215	0.893735	0.60547								3.86089	1.82532	78.8854	97.4523	739087	28.6801	959.099
38	2018	1.03898	14.8229	46.1116	SVN	0.400935	0.160749	0.218244	0	0	0	0	0	1	-1089237503	54.541	56.5582	1.34257	26123.7	5.17442	0.0461542	Slovenia	33.3487	96.2344	2470000	29.0963	722766	79.75	1.62786	3.67206	0.7714	0.8146	0.7986	0.8923	0.6232	Slovenia	37	0.7714	0.8146	0.7986	0.8923	0.6232	3.67206	1.62786	79.75	96.2344	722766	29.0963	980.644
38	2019	0.988753	14.8229	46.1116	SVN	0.490154	0.240251	0.243123	0	0	0	0	0	1	-8.56938e+08	54.822	56.4243	1.36985	26016.1	4.99783	0.0445304	Slovenia	34.1041	97.2503	2510000	29.7193	707059	83.1084	1.78636	3.38458	0.813	0.83585	0.82575	0.90895	0.70425								3.38458	1.78636	83.1084	97.2503	707059	29.7193	982.585
38	2020	0.844202	14.8229	46.1116	SVN	0.598635	0.358364	0.275183	0	0	0	0	0	1	3.20588e+08	55.118	57.0795	1.41058	25545.2	5.58943	0.0430274	Slovenia	34.0435	97.3723	2550000	30.7702	704909	86.6013	1.80673	3.78932	0.8546	0.8571	0.8529	0.9256	0.7853	Slovenia	23	0.8546	0.8571	0.8529	0.9256	0.7853	3.78932	1.80673	86.6013	97.3723	704909	30.7702	978.114
38	2021	1.27316	14.8229	46.1116	SVN	0.712295	0.507364	0.310903	0	0	0	0	0	1	-507613443	55.427	57.708	1.20868	29291.4	5.41863	0.0473678	Slovenia	30.0186	98.0551	2610000	31.6833	695444	89.004	2.05615	4.34694	0.8962	0.87835	0.88005	0.94225	0.86635								4.34694	2.05615	89.004	98.0551	695444	31.6833	971.55
39	2006	2.30047	35.1737	39.0614	TUR	-0.48987	0.239973	0.0434597	0	1	0	0	0	0	-19261000000	68.45	53.4337	1.24117	8003.55	44.176	0.445198	Turkiye	26.7692		52700000	3.9851	18800000	18.24	3.71555	5.53981	0.491767	0.235927	0.48918	0.80385	0.182897								5.53981	3.71555	18.24		18800000	3.9851	20432.1
39	2007	0.915237	35.1737	39.0614	TUR	-0.512053	0.262199	0.0408152	0	1	0	0	0	0	-19941000000	69.053	54.8811	1.21862	9668.63	36.217	0.364717	Turkiye	26.7494	68.0686	62000000	6.7459	18200000	28.63	2.68895	5.03074	0.487583	0.186143	0.45529	0.8077	0.201003								5.03074	2.68895	28.63	68.0686	18200000	6.7459	20749.1
39	2008	0.954456	35.1737	39.0614	TUR	-0.568371	0.323045	0.0344744	0	1	0	0	0	0	-17302000000	69.651	55.5432	1.21368	10802.8	34.165	0.341348	Turkiye	26.8099	70.4306	65800000	8.07194	17500000	34.37	1.82346	3.91062	0.4834	0.13636	0.4214	0.81155	0.21911	T眉rkiye	76	0.4834	0.13636	0.4214	0.81155	0.21911	3.91062	1.82346	34.37		17500000	8.07194	21192.1
39	2009	0.934405	35.1737	39.0614	TUR	-0.527755	0.278526	0.0389936	0	1	0	0	0	0	-7032000000	70.241	57.1617	1.14536	8989.5	37.781	0.373713	Turkiye	25.3025	72.7926	62800000	8.93074	16500000	36.4	1.97936	5.02478	0.4807	0.17532	0.383715	0.822705	0.238605								5.02478	1.97936	36.4		16500000	8.93074	21270.3
39	2010	1.17193	35.1737	39.0614	TUR	-0.535863	0.287149	0.0380692	0	1	0	0	0	0	-7617000000	70.825	54.5443	1.1666	10615.3	55.332	0.541856	Turkiye	26.2222	75.1547	61800000	9.69756	16200000	39.82	1.83733	4.47066	0.478	0.21428	0.34603	0.83386	0.2581	T眉rkiye	69	0.478	0.21428	0.34603	0.83386	0.2581	4.47066	1.83733	39.82		16200000	9.69756	22592.3
39	2011	1.12258	35.1737	39.0614	TUR	-0.512718	0.26288	0.0407373	0	1	0	0	0	0	-13812000000	71.402	53.0462	1.14196	11308.1	56.908	0.564459	Turkiye	26.4615	77.5167	65300000	10.2346	15200000	43.0657	1.65464	3.8259	0.50306	0.13344	0.40504	0.80321	0.302935								3.8259	1.65464	43.0657		15200000	10.2346	24098.6
39	2012	0.887118	35.1737	39.0614	TUR	-0.461473	0.212958	0.0469661	0	1	0	0	0	0	-9638000000	71.974	54.0047	1.08583	11697.5	63.997	0.629239	Turkiye	26.0275	79.8787	67700000	10.4533	13900000	45.13	1.7335	4.1813	0.52812	0.0526	0.46405	0.77256	0.34777	T眉rkiye	80	0.52812	0.0526	0.46405	0.77256	0.34777	4.1813	1.7335	45.13	79.8787	13900000	10.4533	24819.1
39	2013	1.01514	35.1737	39.0614	TUR	-0.349547	0.122183	0.0621109	0	1	0	0	0	0	-9927000000	72.531	53.3381	1.09989	12507.6	68.003	0.684264	Turkiye	26.3907	82.0131	69700000	11.6138	13600000	46.25	1.71833	4.62794	0.5362	0.271395	0.51155	0.74293	0.354125								4.62794	1.71833	46.25		13600000	11.6138	25518.8
39	2014	0.982127	35.1737	39.0614	TUR	-0.229257	0.0525589	0.0807434	0	1	0	0	0	0	-6287000000	73.077	53.8279	1.15152	12020.6	51.699	0.519122	Turkiye	27.8574	84.1475	71900000	11.3508	12500000	51.04	1.87655	5.18598	0.54428	0.49019	0.55905	0.7133	0.36048	T眉rkiye	71	0.54428	0.49019	0.55905	0.7133	0.36048	5.18598	1.87655	51.04		12500000	11.3508	25929.3
39	2015	0.96982	35.1737	39.0614	TUR	-0.14343	0.020572	0.0955296	0	1	0	0	0	0	-14167000000	73.611	53.4756	1.11878	10852	82.304	0.795754	Turkiye	27.2258	86.282	73600000	11.9335	11500000	53.745	1.79961	5.76495	0.567115	0.558655	0.58025	0.75213	0.368965								5.76495	1.79961	53.745		11500000	11.9335	26616.8
39	2016	0.969619	35.1737	39.0614	TUR	-0.0581686	0.00338359	0.111448	0	1	0	0	0	0	-10697000000	74.134	53.9864	1.09668	10734.4	89.5341	0.859075	Turkiye	26.7759	88.4164	75100000	12.9595	11100000	58.3477	1.47558	6.22256	0.58995	0.62712	0.60145	0.79096	0.37745	T眉rkiye	68	0.58995	0.62712	0.60145	0.79096	0.37745	6.22256	1.47558	58.3477		11100000	12.9595	27214.7
39	2017	1.014	35.1737	39.0614	TUR	0.118971	0.0141542	0.148442	0	1	0	0	0	0	-8487000000	74.644	53.5365	1.07613	10464.1	86.6579	0.818884	Turkiye	26.5378	90.5508	77800000	14.5267	11300000	64.6846	1.33145	5.67572	0.650575	0.74336	0.745175	0.80288	0.403625								5.67572	1.33145	64.6846		11300000	14.5267	28196.1
39	2018	1.00707	35.1737	39.0614	TUR	0.268676	0.0721868	0.183832	0	1	0	0	0	0	-8915000000	75.143	54.4656	1.07347	9400.78	96.9128	0.902004	Turkiye	26.6644	92.6852	80100000	16.1905	11600000	71.0428	1.23844	4.09425	0.7112	0.8596	0.8889	0.8148	0.4298	T眉rkiye	53	0.7112	0.8596	0.8889	0.8148	0.4298	4.09425	1.23844	71.0428	92.6852	11600000	16.1905	28733.1
39	2019	0.977714	35.1737	39.0614	TUR	0.330161	0.109007	0.199463	0	1	0	0	0	0	-6628000000	75.63	56.363	1.01699	9103.04	131.226	1.18425	Turkiye	25.3192	93.4969	80800000	17.048	11500000	73.9767	1.14638	4.05691	0.7415	0.87625	0.87385	0.82175	0.5289								4.05691	1.14638	73.9767	93.4969	11500000	17.048	28078.9
39	2020	1.08817	35.1737	39.0614	TUR	0.418847	0.175433	0.223131	0	1	0	0	0	0	-4592000000	76.105	54.2027	1.08726	8561.07	128.109	1.1399	Turkiye	26.2404	95.2625	82100000	19.8904	12400000	77.6696	1.0045	4.56513	0.7718	0.8929	0.8588	0.8287	0.628	T眉rkiye	53	0.7718	0.8929	0.8588	0.8287	0.628	4.56513	1.0045	77.6696	95.2625	12400000	19.8904	26804.5
39	2021	1.11608	35.1737	39.0614	TUR	0.473342	0.224052	0.238333	0	1	0	0	0	0	-7547000000	76.569	52.7539	1.06875	9661.24	116.392	1.04351	Turkiye	26.5434	95.977	86300000	21.3927	12300000	81.41	0.88159	4.09523	0.8021	0.90955	0.84375	0.83565	0.7271								4.09523	0.88159	81.41	95.977	12300000	21.3927	28796.8
40	2006	3.09976	31.4106	49.0088	UKR	-0.496326	0.24634	0.0426816	0	0	0	0	1	0	-5737000000	67.969	49.8232	1.1628	2391.32	12.792	0.11355	Ukraine	25.0789		49100000	1.11549	12400000	4.50612	0.68339	3.18707	0.554673	0.432773	0.565543	0.94361	0.155237								3.18707	0.68339	4.50612		12400000	1.11549	20730.4
40	2007	0.983061	31.4106	49.0088	UKR	-0.471566	0.222374	0.0457043	0	0	0	0	1	0	-9218000000	68.147	51.6171	1.16154	3197.93	10.087	0.112144	Ukraine	25.4964		55200000	1.72465	12900000	6.55	1.16409	2.27696	0.563737	0.500477	0.550327	0.94722	0.194403								2.27696	1.16409	6.55		12900000	1.72465	20904.8
40	2008	0.878858	31.4106	49.0088	UKR	-0.433493	0.187916	0.0505541	0	0	0	0	1	0	-9903000000	68.325	52.8784	1.1633	4066.55	11.442	0.0980061	Ukraine	25.6971		55700000	3.46422	13200000	11	0.96822	1.90471	0.5728	0.56818	0.53511	0.95083	0.23357	Ukraine	41	0.5728	0.56818	0.53511	0.95083	0.23357	1.90471	0.96822	11		13200000	3.46422	20972.3
40	2009	0.836546	31.4106	49.0088	UKR	-0.515682	0.265928	0.0403906	0	0	0	0	1	0	-4654000000	68.502	55.9949	1.22587	2639.39	11.999	0.0824265	Ukraine	27.081		54900000	4.14771	13000000	17.9	1.10275	2.18679	0.54544	0.41266	0.44057	0.95778	0.24113								2.18679	1.10275	17.9		13000000	4.14771	20191.5
40	2010	1.25404	31.4106	49.0088	UKR	-0.576418	0.332258	0.0336121	0	0	0	0	1	0	-5759000000	68.596	55.4893	1.19952	3078.43	13.26	0.087897	Ukraine	26.9622		53900000	6.4549	12900000	23.3	1.0704	3.19373	0.51808	0.25714	0.34603	0.96473	0.24869	Ukraine	54	0.51808	0.25714	0.34603	0.96473	0.24869	3.19373	1.0704	23.3		12900000	6.4549	20265.9
40	2011	1.43604	31.4106	49.0088	UKR	-0.544844	0.296855	0.0370582	0	0	0	0	1	0	-7015000000	68.689	53.5004	1.16626	3704.82	11.091	0.0470075	Ukraine	27.0245		55600000	6.95621	12700000	28.7083	0.89125	2.58609	0.54169	0.20752	0.38543	0.941155	0.30109								2.58609	0.89125	28.7083		12700000	6.95621	20324.2
40	2012	0.973661	31.4106	49.0088	UKR	-0.449554	0.202099	0.0484783	0	0	0	0	1	0	-7195000000	68.782	54.4753	1.13374	4004.8	11.129	0.022633	Ukraine	27.1757		59300000	8.03755	12200000	35.27	1.09625	3.77058	0.5653	0.1579	0.42483	0.91758	0.35349	Ukraine	68	0.5653	0.1579	0.42483	0.91758	0.35349	3.77058	1.09625	35.27		12200000	8.03755	20354.3
40	2013	0.969582	31.4106	49.0088	UKR	-0.462782	0.214167	0.0468015	0	0	0	0	1	0	-4079000000	68.875	56.6427	1.08928	4187.74	14.978	0.0747227	Ukraine	26.1361		62500000	8.85843	11800000	40.9541	0.92708	3.78796	0.53423	0.294635	0.34627	0.88959	0.366825								3.78796	0.92708	40.9541		11800000	8.85843	20352.4
40	2014	0.934093	31.4106	49.0088	UKR	-0.483082	0.233368	0.0442856	0	0	0	0	1	0	-299000000	68.968	54.1589	1.08054	3104.64	10.121	0.0815497	Ukraine	26.1402		61200000	9.30621	10500000	46.236	0.95911	3.55645	0.50316	0.43137	0.26771	0.8616	0.38016	Ukraine	87	0.50316	0.43137	0.26771	0.8616	0.38016	3.55645	0.95911	46.236		10500000	9.30621	18575.2
40	2015	1.08339	31.4106	49.0088	UKR	-0.282107	0.0795846	0.0722565	0	0	0	0	1	0	236000000	69.061	51.1686	1.01459	2124.66	7.103	0.111895	Ukraine	24.6904		60700000	11.6437	9110000	48.8846	0.82499	4.0061	0.55536	0.588565	0.427335	0.850275	0.388465								4.0061	0.82499	48.8846		9110000	11.6437	16405.4
40	2016	1.25633	31.4106	49.0088	UKR	-0.0701929	0.00492704	0.109129	0	0	0	0	1	0	-3955000000	69.154	49.9142	0.993012	2187.73	9.208	0.110179	Ukraine	24.2448		56700000	12.0343	8450000	53.001	0.94632	4.87801	0.60756	0.74576	0.58696	0.83895	0.39677	Ukraine	62	0.60756	0.74576	0.58696	0.83895	0.39677	4.87801	0.94632	53.001		8450000	12.0343	16276.9
40	2017	0.993631	31.4106	49.0088	UKR	-0.0508596	0.0025867	0.11287	0	0	0	0	1	0	-3446000000	69.246	50.9587	0.985179	2638.33	10.789	0.118838	Ukraine	24.295		55700000	12.3535	7190000	58.8895	0.93198	5.12727	0.61203	0.71558	0.57818	0.841275	0.416585								5.12727	0.93198	58.8895		7190000	12.3535	16156.4
40	2018	0.898157	31.4106	49.0088	UKR	-0.0236361	0.000558665	0.118245	0	0	0	0	1	0	-4859000000	69.352	51.3323	0.969786	3096.56	12.9117	0.119558	Ukraine	24.089		53900000	12.8033	6070000	62.5532	0.98474	5.79548	0.6165	0.6854	0.5694	0.8436	0.4364	Ukraine	82	0.6165	0.6854	0.5694	0.8436	0.4364	5.79548	0.98474	62.5532		6070000	12.8033	16360.9
40	2019	0.924741	31.4106	49.0088	UKR	0.143329	0.0205431	0.153943	0	0	0	0	1	0	-5175000000	69.473	54.4855	0.960376	3661.46	11.8683	0.115932	Ukraine	23.9098		54800000	16.1591	4180000	70.1248	0.82586	6.59061	0.6642	0.74745	0.6259	0.85135	0.5153								6.59061	0.82586	70.1248		4180000	16.1591	16668
40	2020	0.876545	31.4106	49.0088	UKR	0.260446	0.0678319	0.181789	0	0	0	0	1	0	58000000	69.608	55.79	0.994247	3751.74	17.5588	0.154869	Ukraine	23.9956		54000000	18.617	3310000	75.0379	0.73355	5.95476	0.7119	0.8095	0.6824	0.8591	0.5942	Ukraine	69	0.7119	0.8095	0.6824	0.8591	0.5942	5.95476	0.73355	75.0379		3310000	18.617	15995.5
40	2021	1.07701	31.4106	49.0088	UKR	0.36326	0.131958	0.208141	0	0	0	0	1	0	-6885000000	69.757	51.839	0.984858	4835.57	16.5166	0.158441	Ukraine	24.4597		55900000	18.2678	2280000	79.2183	0.67969	5.35607	0.7596	0.87155	0.7389	0.86685	0.6731								5.35607	0.67969	79.2183		2280000	18.2678	15693.4
[truncated: 51 more columns]
